# Supplementary material
Source: publisher site journal article supplement (https://www.spandidos-publications.com/7325/downloadSupplementary)
Supplement: Supplementary file 1 [file downloadSupplementary]

## Sheet: Table S7
Table SVII. Gene Ontology enrichment analysis.
	ONTOLOGY	ID	Description	GeneRatio	BgRatio	pvalue	p.adjust	qvalue	geneID	Count
GO:0042110	BP	GO:0042110	T cell activation	54/593	487/18723	9.32712e-16	4.38468e-12	3.30082e-12	CD24/CAV1/SDC4/MDK/LGALS3/SOX4/TMEM98/ANXA1/CD55/DPP4/CD151/ZFP36L1/EGR1/ARG2/RAB27A/ITK/SIT1/TNFSF13B/MAP3K8/ICOS/DOCK8/PYCARD/RUNX3/SPI1/TNFRSF1B/CD8A/CD27/RHOH/FGL2/TIGIT/TNFRSF4/ZFP36L2/CD48/CD3G/HLA-DQB1/CD3E/IL7R/GPR183/CD2/PTPRC/CD3D/FCER1G/CCL5/ITGAL/LGALS9/LGALS1/BCL2/CCND3/PNP/CD44/RORA/BAX/PRDM1/MSN	54
GO:0045785	BP	GO:0045785	positive regulation of cell adhesion	45/593	437/18723	3.47972e-12	8.17908e-09	6.15727e-09	CD24/FN1/CAV1/SDC4/MDK/AGR2/SOX4/VEGFA/ANXA1/CCDC80/COL8A1/ITGA3/CD55/DPP4/EMP2/CALR/CCL28/BMP7/RRAS/ITGA2/EPHA4/ANK3/EPB41L5/CHST2/TNFSF13B/MAP3K8/ICOS/DOCK8/PYCARD/RUNX3/CD27/RHOH/HLA-DQB1/CD3E/IL7R/PTPRC/CCL5/TNFRSF18/LGALS9/MYADM/LGALS1/ATM/PLAUR/PNP/CD44	45
GO:0051251	BP	GO:0051251	positive regulation of lymphocyte activation	38/593	362/18723	1.00559e-10	1.3111e-07	9.87003e-08	CD24/CAV1/MDK/SOX4/ANXA1/CD55/DPP4/SLC39A10/CD320/TNFSF13B/MAP3K8/ICOS/DOCK8/PYCARD/SH3KBP1/RUNX3/CD27/RHOH/TNFRSF4/MEF2C/HLA-DQB1/TRBC1/CD3E/IL7R/GPR183/IGHG4/TRBC2/PTPRC/CCL5/TYROBP/GAS6/LGALS9/TGFB1/LGALS1/IGHG1/BCL2/CDKN1A/PNP	38
GO:0007159	BP	GO:0007159	leukocyte cell-cell adhesion	38/593	371/18723	2.06008e-10	1.3111e-07	9.87003e-08	CD24/CAV1/SDC4/MDK/LGALS3/SOX4/ANXA1/CD55/DPP4/CCL28/BMP7/ARG2/NT5E/CHST2/SELPLG/TNFSF13B/MAP3K8/ICOS/DOCK8/PYCARD/RUNX3/CD27/RHOH/FGL2/TIGIT/HLA-DQB1/CD3E/IL7R/PTPRC/CCL5/ITGAL/LGALS9/SEMA4D/LGALS1/PNP/CD44/KLF4/MSN	38
GO:0048545	BP	GO:0048545	response to steroid hormone	36/593	339/18723	2.2899e-10	1.3111e-07	9.87003e-08	CAV1/MDK/LMO3/CCND1/CLDN1/ANXA1/ANXA3/ATP1A1/PAM/ZFP36L1/CALR/ERRFI1/BMP7/SREBF1/DDX17/HMGA2/SDC1/ARNTL/SLIT3/RXRG/SPARC/TXNIP/AREG/ZFP36L2/ZFP36/DAB2/TGFB1/NR3C1/DDIT4/BCL2/CDKN1A/KLF9/ATP2B1/DUSP1/FOSB/FOS	36
GO:0052547	BP	GO:0052547	regulation of peptidase activity	43/593	461/18723	2.59752e-10	1.3111e-07	9.87003e-08	FN1/SLPI/CST6/CAV1/APLP2/PEBP1/SERPINA1/PERP/CRYAB/CTSH/VEGFA/TIMP1/PROS1/PCSK1N/SPINT1/MTCH1/ECM1/PTTG1/EPHA4/RPS27L/POR/CD109/SPOCK1/SERPINB9/PYCARD/CD27/CST7/GAS6/ASPH/LGALS9/TNFAIP8/TNFSF10/BIN1/CYCS/PLAUR/PSMB8/CD44/DDX3X/KLF4/PMAIP1/HERPUD1/BAX/NR4A1	43
GO:0030098	BP	GO:0030098	lymphocyte differentiation	38/593	374/18723	2.60181e-10	1.3111e-07	9.87003e-08	MDK/SOX4/TMEM98/ANXA1/ZFP36L1/EGR1/HECTD1/ITK/TNFSF13B/IRF8/IKZF1/KLF6/RUNX3/SPI1/CD8A/CD27/RHOH/FGL2/ITM2A/ZFP36L2/CD3G/CD3E/IL7R/GPR183/CD2/PTPRC/CD3D/FCER1G/GAS6/LGALS9/LGALS1/BCL2/ATM/IKZF3/PNP/RORA/BAX/PRDM1	38
GO:1903131	BP	GO:1903131	mononuclear cell differentiation	41/593	426/18723	2.66569e-10	1.3111e-07	9.87003e-08	MDK/SOX4/VEGFA/TMEM98/ANXA1/ZFP36L1/DCSTAMP/EGR1/HECTD1/ITK/TNFSF13B/IRF8/IKZF1/KLF6/RUNX3/SPI1/CD8A/CD27/RHOH/FGL2/HLA-B/ITM2A/ZFP36L2/CD3G/CD3E/IL7R/GPR183/CD2/PTPRC/CD3D/FCER1G/GAS6/LGALS9/LGALS1/BCL2/ATM/IKZF3/PNP/RORA/BAX/PRDM1	41
GO:0002696	BP	GO:0002696	positive regulation of leukocyte activation	40/593	409/18723	2.74876e-10	1.3111e-07	9.87003e-08	CD24/CAV1/MDK/SOX4/ANXA1/LRRK2/CD55/DPP4/SLC39A10/CD320/TNFSF13B/MAP3K8/ICOS/DOCK8/PYCARD/SH3KBP1/RUNX3/CD27/RHOH/TNFRSF4/MEF2C/HLA-DQB1/TRBC1/CD3E/IL7R/GPR183/CD2/IGHG4/TRBC2/PTPRC/CCL5/TYROBP/GAS6/LGALS9/TGFB1/LGALS1/IGHG1/BCL2/CDKN1A/PNP	40
GO:0051384	BP	GO:0051384	response to glucocorticoid	23/593	148/18723	2.78897e-10	1.3111e-07	9.87003e-08	MDK/CCND1/CLDN1/ANXA1/ANXA3/PAM/ZFP36L1/ERRFI1/SDC1/SLIT3/SPARC/AREG/ZFP36L2/ZFP36/NR3C1/DDIT4/BCL2/CDKN1A/KLF9/ATP2B1/DUSP1/FOSB/FOS	23
GO:0022407	BP	GO:0022407	regulation of cell-cell adhesion	42/593	448/18723	3.61471e-10	1.5448e-07	1.16293e-07	CD24/CAV1/SDC4/MDK/LGALS3/SOX4/VEGFA/ANXA1/CD55/DPP4/MUC21/CCL28/BMP7/ARG2/ANK3/EPB41L5/CHST2/TNFSF13B/MAP3K8/ICOS/DOCK8/PYCARD/RUNX3/SPI1/CD27/RHOH/FGL2/TIGIT/FXYD5/HLA-DQB1/CD3E/IL7R/PTPRC/CCL5/LGALS9/TGFB1/MYADM/LGALS1/PLAUR/PNP/CD44/KLF4	42
GO:0050867	BP	GO:0050867	positive regulation of cell activation	40/593	420/18723	6.05161e-10	2.21068e-07	1.66422e-07	CD24/CAV1/MDK/SOX4/ANXA1/LRRK2/CD55/DPP4/SLC39A10/CD320/TNFSF13B/MAP3K8/ICOS/DOCK8/PYCARD/SH3KBP1/RUNX3/CD27/RHOH/TNFRSF4/MEF2C/HLA-DQB1/TRBC1/CD3E/IL7R/GPR183/CD2/IGHG4/TRBC2/PTPRC/CCL5/TYROBP/GAS6/LGALS9/TGFB1/LGALS1/IGHG1/BCL2/CDKN1A/PNP	40
GO:0070661	BP	GO:0070661	leukocyte proliferation	34/593	318/18723	6.11334e-10	2.21068e-07	1.66422e-07	CLU/CD24/SDC4/LGALS3/ANXA1/CD55/CD151/SLC39A10/ARG2/CD320/TNFSF13B/DOCK8/PYCARD/TNFRSF1B/TNFRSF4/MEF2C/MNDA/LST1/TNFAIP3/CD3E/IL7R/GPR183/PTPRC/CCL5/TYROBP/LGALS9/BCL2/CDKN1A/ATM/IKZF3/CCND3/PNP/BAX/MSN	34
GO:0046651	BP	GO:0046651	lymphocyte proliferation	32/593	288/18723	7.49631e-10	2.51716e-07	1.89493e-07	CD24/SDC4/LGALS3/ANXA1/CD55/CD151/SLC39A10/ARG2/CD320/TNFSF13B/DOCK8/PYCARD/TNFRSF1B/TNFRSF4/MEF2C/MNDA/LST1/CD3E/IL7R/GPR183/PTPRC/CCL5/TYROBP/LGALS9/BCL2/CDKN1A/ATM/IKZF3/CCND3/PNP/BAX/MSN	32
GO:0032943	BP	GO:0032943	mononuclear cell proliferation	32/593	291/18723	9.73953e-10	3.05237e-07	2.29784e-07	CD24/SDC4/LGALS3/ANXA1/CD55/CD151/SLC39A10/ARG2/CD320/TNFSF13B/DOCK8/PYCARD/TNFRSF1B/TNFRSF4/MEF2C/MNDA/LST1/CD3E/IL7R/GPR183/PTPRC/CCL5/TYROBP/LGALS9/BCL2/CDKN1A/ATM/IKZF3/CCND3/PNP/BAX/MSN	32
GO:0051346	BP	GO:0051346	negative regulation of hydrolase activity	37/593	379/18723	1.37219e-09	3.8239e-07	2.87866e-07	SLPI/CST6/APLP2/PEBP1/SERPINA1/LGALS3/CRYAB/VEGFA/TIMP1/PROS1/ANXA1/APOC1/LRRK2/PCSK1N/SPINT1/ECM1/PTTG1/POR/CD109/SPOCK1/SPRY1/SERPINB9/CD27/RGS2/CST7/GAS6/PXK/SEMA4D/TNFAIP8/BIN1/PLAUR/CD44/PPP1R15A/DDX3X/KLF4/HERPUD1/NR4A1	37
GO:0052548	BP	GO:0052548	regulation of endopeptidase activity	40/593	432/18723	1.38282e-09	3.8239e-07	2.87866e-07	SLPI/CST6/APLP2/PEBP1/SERPINA1/PERP/CRYAB/CTSH/VEGFA/TIMP1/PROS1/PCSK1N/SPINT1/MTCH1/PTTG1/EPHA4/RPS27L/POR/CD109/SPOCK1/SERPINB9/PYCARD/CD27/CST7/GAS6/ASPH/LGALS9/TNFAIP8/TNFSF10/BIN1/CYCS/PLAUR/PSMB8/CD44/DDX3X/KLF4/PMAIP1/HERPUD1/BAX/NR4A1	40
GO:0031960	BP	GO:0031960	response to corticosteroid	23/593	167/18723	3.17072e-09	8.28086e-07	6.23389e-07	MDK/CCND1/CLDN1/ANXA1/ANXA3/PAM/ZFP36L1/ERRFI1/SDC1/SLIT3/SPARC/AREG/ZFP36L2/ZFP36/NR3C1/DDIT4/BCL2/CDKN1A/KLF9/ATP2B1/DUSP1/FOSB/FOS	23
GO:0006590	BP	GO:0006590	thyroid hormone generation	9/593	20/18723	3.71313e-09	9.18705e-07	6.91608e-07	TG/CTSB/PAX8/CPQ/TPO/DIO2/FOXE1/HPN/DUOXA2	9
GO:0071356	BP	GO:0071356	cellular response to tumor necrosis factor	27/593	229/18723	4.46886e-09	1.05041e-06	7.90754e-07	LCN2/ASAH1/CLDN1/CHI3L1/ZFP36L1/DCSTAMP/TNFSF13B/PYCARD/TNFRSF1B/NFKBIA/KLF2/TNFRSF4/ZFP36L2/ZFP36/TNFAIP3/CCL3L3/TMSB4X/CCL5/CCL4/GAS6/TNFRSF18/GBP3/GBP2/CD58/RORA/CYLD/CXCL8	27
GO:0042403	BP	GO:0042403	thyroid hormone metabolic process	10/593	27/18723	4.88735e-09	1.09407e-06	8.23622e-07	TG/CTSB/PAX8/IYD/CPQ/TPO/DIO2/FOXE1/HPN/DUOXA2	10
GO:0045861	BP	GO:0045861	negative regulation of proteolysis	34/593	351/18723	7.87701e-09	1.68317e-06	1.26711e-06	SLPI/CST6/APLP2/PEBP1/SERPINA1/CRYAB/CAMK2N1/VEGFA/TIMP1/TMEM98/PROS1/LRRK2/PCSK1N/SPINT1/ECM1/PTTG1/EPHA4/POR/GIPC1/CD109/SPOCK1/SERPINB9/CD27/SDCBP/CST7/GAS6/TNFAIP8/BIN1/PLAUR/CD44/DDX3X/KLF4/HERPUD1/NR4A1	34
GO:0050670	BP	GO:0050670	regulation of lymphocyte proliferation	26/593	225/18723	1.31863e-08	2.69277e-06	2.02713e-06	CD24/SDC4/LGALS3/ANXA1/CD55/SLC39A10/ARG2/CD320/TNFSF13B/PYCARD/TNFRSF1B/TNFRSF4/MEF2C/MNDA/LST1/CD3E/GPR183/PTPRC/CCL5/TYROBP/LGALS9/BCL2/CDKN1A/ATM/IKZF3/PNP	26
GO:0002685	BP	GO:0002685	regulation of leukocyte migration	25/593	210/18723	1.37474e-08	2.69277e-06	2.02713e-06	MDK/LGALS3/DAPK2/VEGFA/ANXA1/DPP4/CALR/CCL28/ECM1/MTUS1/ITGA2/CHST2/RARRES2/DOCK8/PYCARD/SPI1/RHOH/CCL5/CCL4/GAS6/TNFRSF18/LGALS9/DUSP1/CXCL8/MSN	25
GO:0032944	BP	GO:0032944	regulation of mononuclear cell proliferation	26/593	227/18723	1.58597e-08	2.98225e-06	2.24506e-06	CD24/SDC4/LGALS3/ANXA1/CD55/SLC39A10/ARG2/CD320/TNFSF13B/PYCARD/TNFRSF1B/TNFRSF4/MEF2C/MNDA/LST1/CD3E/GPR183/PTPRC/CCL5/TYROBP/LGALS9/BCL2/CDKN1A/ATM/IKZF3/PNP	26
GO:0050864	BP	GO:0050864	regulation of B cell activation	24/593	198/18723	1.88245e-08	3.32275e-06	2.50139e-06	ZFP36L1/SLC39A10/CD320/TNFSF13B/SH3KBP1/TBC1D10C/CD27/TNFRSF4/MEF2C/ZFP36L2/MNDA/TNFAIP3/TRBC1/GPR183/IGHG4/TRBC2/PTPRC/TYROBP/TGFB1/IGHG1/BCL2/CDKN1A/ATM/IKZF3	24
GO:0070663	BP	GO:0070663	regulation of leukocyte proliferation	27/593	245/18723	1.91934e-08	3.32275e-06	2.50139e-06	CD24/SDC4/LGALS3/ANXA1/CD55/SLC39A10/ARG2/CD320/TNFSF13B/PYCARD/TNFRSF1B/TNFRSF4/MEF2C/MNDA/LST1/TNFAIP3/CD3E/GPR183/PTPRC/CCL5/TYROBP/LGALS9/BCL2/CDKN1A/ATM/IKZF3/PNP	27
GO:0050863	BP	GO:0050863	regulation of T cell activation	32/593	329/18723	1.97909e-08	3.32275e-06	2.50139e-06	CD24/CAV1/SDC4/MDK/LGALS3/SOX4/ANXA1/CD55/DPP4/ARG2/SIT1/TNFSF13B/MAP3K8/ICOS/DOCK8/PYCARD/RUNX3/TNFRSF1B/CD27/RHOH/FGL2/TIGIT/HLA-DQB1/CD3E/IL7R/CD2/PTPRC/CCL5/LGALS9/LGALS1/PNP/PRDM1	32
GO:0010466	BP	GO:0010466	negative regulation of peptidase activity	28/593	262/18723	2.05291e-08	3.32784e-06	2.50522e-06	SLPI/CST6/APLP2/PEBP1/SERPINA1/CRYAB/VEGFA/TIMP1/PROS1/PCSK1N/SPINT1/ECM1/PTTG1/POR/CD109/SPOCK1/SERPINB9/CD27/CST7/GAS6/TNFAIP8/BIN1/PLAUR/CD44/DDX3X/KLF4/HERPUD1/NR4A1	28
GO:0050900	BP	GO:0050900	leukocyte migration	34/593	369/18723	2.74807e-08	4.30622e-06	3.24175e-06	MDK/LGALS3/DAPK2/VEGFA/ANXA1/DPP4/CALR/EPS8/CCL28/ECM1/MTUS1/ITGA2/CHST2/NINJ1/RARRES2/IL16/SELPLG/DOCK8/PYCARD/PDE4B/SPI1/RHOH/CCL3L3/GPR183/FCER1G/CCL5/CCL4/ITGAL/GAS6/TNFRSF18/LGALS9/DUSP1/CXCL8/MSN	34
GO:0042445	BP	GO:0042445	hormone metabolic process	25/593	218/18723	2.92361e-08	4.43351e-06	3.33758e-06	TG/CTSB/PAX8/DHRS3/IYD/CPQ/HSD17B6/PCSK1N/TPO/DIO2/ATP1A1/PCSK2/FOXE1/CRABP2/EGR1/ECE1/HPN/HSD17B4/POR/SCPEP1/ALDH9A1/SCG5/TIPARP/ALDH1A1/DUOXA2	25
GO:1903037	BP	GO:1903037	regulation of leukocyte cell-cell adhesion	32/593	336/18723	3.26162e-08	4.79152e-06	3.60709e-06	CD24/CAV1/SDC4/MDK/LGALS3/SOX4/ANXA1/CD55/DPP4/CCL28/ARG2/CHST2/TNFSF13B/MAP3K8/ICOS/DOCK8/PYCARD/RUNX3/CD27/RHOH/FGL2/TIGIT/HLA-DQB1/CD3E/IL7R/PTPRC/CCL5/LGALS9/LGALS1/PNP/CD44/KLF4	32
GO:0010951	BP	GO:0010951	negative regulation of endopeptidase activity	27/593	252/18723	3.48333e-08	4.96217e-06	3.73556e-06	SLPI/CST6/APLP2/PEBP1/SERPINA1/CRYAB/VEGFA/TIMP1/PROS1/PCSK1N/SPINT1/PTTG1/POR/CD109/SPOCK1/SERPINB9/CD27/CST7/GAS6/TNFAIP8/BIN1/PLAUR/CD44/DDX3X/KLF4/HERPUD1/NR4A1	27
GO:0034612	BP	GO:0034612	response to tumor necrosis factor	27/593	253/18723	3.78561e-08	5.23416e-06	3.94031e-06	LCN2/ASAH1/CLDN1/CHI3L1/ZFP36L1/DCSTAMP/TNFSF13B/PYCARD/TNFRSF1B/NFKBIA/KLF2/TNFRSF4/ZFP36L2/ZFP36/TNFAIP3/CCL3L3/TMSB4X/CCL5/CCL4/GAS6/TNFRSF18/GBP3/GBP2/CD58/RORA/CYLD/CXCL8	27
GO:0071559	BP	GO:0071559	response to transforming growth factor beta	27/593	256/18723	4.8455e-08	6.5082e-06	4.89942e-06	CAV1/CLDN1/ID1/CITED1/GDF15/HSPA5/ITGA3/ZFP36L1/FOLR1/LTBP2/LTBP4/EPB41L5/GIPC1/VASN/CD109/SNX25/SPRY1/FBN1/RUNX3/SPI1/SDCBP/MEF2C/ZFP36L2/DAB2/TGFB1/NR3C1/FOS	27
GO:0030217	BP	GO:0030217	T cell differentiation	27/593	257/18723	5.25621e-08	6.86374e-06	5.16707e-06	MDK/SOX4/TMEM98/ANXA1/ZFP36L1/EGR1/ITK/RUNX3/SPI1/CD8A/CD27/RHOH/FGL2/ZFP36L2/CD3G/CD3E/IL7R/GPR183/CD2/PTPRC/CD3D/FCER1G/LGALS9/BCL2/PNP/RORA/PRDM1	27
GO:0001667	BP	GO:0001667	ameboidal-type cell migration	39/593	475/18723	6.08246e-08	7.72801e-06	5.8177e-06	FN1/TACSTD2/S100A2/SDC4/LCN2/PDLIM1/MET/CTSH/APOE/ID1/VEGFA/TIMP1/ANXA1/ITGA3/DPP4/ANXA3/EMP2/GJA1/FOLR1/CALR/NRP2/BMP7/RRAS/ITGA2/ADAMTS9/EPB41L5/GIPC1/SASH1/SPARC/GLIPR2/ANXA6/MEF2C/TMSB4X/ARHGDIB/PKN2/SEMA4D/TGFB1/KLF4/NR4A1	39
GO:0030888	BP	GO:0030888	regulation of B cell proliferation	13/593	64/18723	8.44337e-08	1.04453e-05	7.86333e-06	SLC39A10/CD320/TNFSF13B/TNFRSF4/MEF2C/MNDA/GPR183/PTPRC/TYROBP/BCL2/CDKN1A/ATM/IKZF3	13
GO:0042113	BP	GO:0042113	B cell activation	31/593	334/18723	9.62454e-08	1.16013e-05	8.73352e-06	ZFP36L1/SLC39A10/CD320/TNFSF13B/IRF8/SH3KBP1/KLF6/TBC1D10C/SPI1/CD27/TNFRSF4/ITM2A/MEF2C/ZFP36L2/MNDA/TNFAIP3/TRBC1/IL7R/GPR183/IGHG4/TRBC2/PTPRC/TYROBP/TGFB1/LGALS1/IGHG1/BCL2/CDKN1A/ATM/IKZF3/BAX	31
GO:0071560	BP	GO:0071560	cellular response to transforming growth factor beta stimulus	26/593	250/18723	1.13707e-07	1.32151e-05	9.94846e-06	CAV1/CLDN1/ID1/CITED1/GDF15/HSPA5/ITGA3/ZFP36L1/FOLR1/LTBP2/LTBP4/EPB41L5/GIPC1/VASN/CD109/SNX25/SPRY1/FBN1/SPI1/SDCBP/MEF2C/ZFP36L2/DAB2/TGFB1/NR3C1/FOS	26
GO:0022409	BP	GO:0022409	positive regulation of cell-cell adhesion	28/593	284/18723	1.15257e-07	1.32151e-05	9.94846e-06	CD24/CAV1/MDK/SOX4/ANXA1/CD55/DPP4/BMP7/ANK3/CHST2/TNFSF13B/MAP3K8/ICOS/DOCK8/PYCARD/RUNX3/CD27/RHOH/HLA-DQB1/CD3E/IL7R/PTPRC/CCL5/LGALS9/LGALS1/PLAUR/PNP/CD44	28
GO:2000116	BP	GO:2000116	regulation of cysteine-type endopeptidase activity	25/593	235/18723	1.28597e-07	1.43936e-05	1.08356e-05	PERP/CRYAB/CTSH/VEGFA/MTCH1/RPS27L/POR/SERPINB9/PYCARD/CD27/CST7/GAS6/ASPH/LGALS9/TNFAIP8/TNFSF10/CYCS/PLAUR/CD44/DDX3X/KLF4/PMAIP1/HERPUD1/BAX/NR4A1	25
GO:1903039	BP	GO:1903039	positive regulation of leukocyte cell-cell adhesion	25/593	239/18723	1.78249e-07	1.94872e-05	1.46701e-05	CD24/CAV1/MDK/SOX4/ANXA1/CD55/DPP4/CHST2/TNFSF13B/MAP3K8/ICOS/DOCK8/PYCARD/RUNX3/CD27/RHOH/HLA-DQB1/CD3E/IL7R/PTPRC/CCL5/LGALS9/LGALS1/PNP/CD44	25
GO:0031589	BP	GO:0031589	cell-substrate adhesion	32/593	363/18723	1.95202e-07	2.08556e-05	1.57002e-05	FN1/TACSTD2/SDC4/MDK/AGR2/ID1/VEGFA/CD63/CCDC80/COL8A1/ITGA3/LAMB3/BCAM/EMP2/CALR/CCL28/RRAS/LIMCH1/MEGF9/ITGA2/ADAMTS9/EPB41L5/SPOCK1/CD96/CD3E/ITGAL/GAS6/PLAU/MYADM/LGALS1/BCL2/CD44	32
GO:2000106	BP	GO:2000106	regulation of leukocyte apoptotic process	14/593	81/18723	2.26538e-07	2.36657e-05	1.78157e-05	LGALS3/ANXA1/SLC39A10/ARG2/DOCK8/CD27/MEF2C/CD3G/IL7R/TSC22D3/CCL5/GAS6/LGALS9/BAX	14
GO:0043409	BP	GO:0043409	negative regulation of MAPK cascade	21/593	180/18723	2.79433e-07	2.85568e-05	2.14978e-05	CAV1/PEBP1/LMO3/CAMK2N1/DUSP6/APOE/ERRFI1/DUSP5/BMP7/ZMYND11/SPRY1/TBC1D10C/RGS2/DUSP2/PTPRC/ATF3/SLC9A3R1/DUSP4/DUSP1/KLF4/CYLD	21
GO:0050870	BP	GO:0050870	positive regulation of T cell activation	23/593	216/18723	4.01851e-07	4.01936e-05	3.02581e-05	CD24/CAV1/MDK/SOX4/ANXA1/CD55/DPP4/TNFSF13B/MAP3K8/ICOS/DOCK8/PYCARD/RUNX3/CD27/RHOH/HLA-DQB1/CD3E/IL7R/PTPRC/CCL5/LGALS9/LGALS1/PNP	23
GO:0007162	BP	GO:0007162	negative regulation of cell adhesion	28/593	303/18723	4.3981e-07	4.30738e-05	3.24263e-05	TACSTD2/SDC4/MDK/LGALS3/MUC1/VEGFA/ANXA1/PLXNB2/MUC21/CCL28/ARG2/EPB41L5/SPOCK1/RUNX3/SPI1/FGL2/TIGIT/FXYD5/ARHGDIB/PTPRC/LGALS9/SEMA4D/TGFBI/TGFB1/MYADM/LGALS1/DUSP1/KLF4	28
GO:2000117	BP	GO:2000117	negative regulation of cysteine-type endopeptidase activity	14/593	86/18723	4.87511e-07	4.67712e-05	3.52097e-05	CRYAB/VEGFA/POR/SERPINB9/CD27/CST7/GAS6/TNFAIP8/PLAUR/CD44/DDX3X/KLF4/HERPUD1/NR4A1	14
GO:0042100	BP	GO:0042100	B cell proliferation	15/593	99/18723	5.00596e-07	4.7066e-05	3.54317e-05	SLC39A10/CD320/TNFSF13B/TNFRSF4/MEF2C/MNDA/IL7R/GPR183/PTPRC/TYROBP/BCL2/CDKN1A/ATM/IKZF3/BAX	15
GO:0006575	BP	GO:0006575	cellular modified amino acid metabolic process	21/593	188/18723	5.80361e-07	5.34956e-05	4.02719e-05	TG/CTSB/PAX8/CLIC3/IYD/CKB/GPX4/CPQ/TPO/DIO2/SERINC2/FOXE1/FOLR1/GSTM3/HPN/POR/ALDH9A1/MBOAT2/DUOXA2/ALDH7A1/CLIC1	21
GO:0070371	BP	GO:0070371	ERK1 and ERK2 cascade	29/593	330/18723	7.79504e-07	7.04701e-05	5.30504e-05	FN1/LMO3/CAMK2N1/DUSP6/CTSH/APOE/CHI3L1/ZFP36L1/ERRFI1/RRAS/SPRY1/GLIPR2/PYCARD/TBC1D10C/ZFP36L2/CCL3L3/GPR183/PTPRC/CCL5/CCL4/GAS6/LGALS9/ATF3/TGFB1/SLC9A3R1/DUSP4/CD44/DUSP1/KLF4	29
GO:0070228	BP	GO:0070228	regulation of lymphocyte apoptotic process	11/593	54/18723	8.14711e-07	7.22633e-05	5.44003e-05	LGALS3/SLC39A10/ARG2/DOCK8/CD27/CD3G/IL7R/TSC22D3/CCL5/LGALS9/BAX	11
GO:0043281	BP	GO:0043281	regulation of cysteine-type endopeptidase activity involved in apoptotic process	22/593	209/18723	8.72181e-07	7.59282e-05	5.71593e-05	CRYAB/CTSH/VEGFA/MTCH1/RPS27L/POR/SERPINB9/PYCARD/CD27/GAS6/LGALS9/TNFAIP8/TNFSF10/CYCS/PLAUR/CD44/DDX3X/KLF4/PMAIP1/HERPUD1/BAX/NR4A1	22
GO:0043154	BP	GO:0043154	negative regulation of cysteine-type endopeptidase activity involved in apoptotic process	13/593	78/18723	9.44227e-07	8.07056e-05	6.07558e-05	CRYAB/VEGFA/POR/SERPINB9/CD27/GAS6/TNFAIP8/PLAUR/CD44/DDX3X/KLF4/HERPUD1/NR4A1	13
GO:1901654	BP	GO:1901654	response to ketone	21/593	194/18723	9.76241e-07	8.19519e-05	6.1694e-05	CAV1/CCND1/CLDN1/CALR/ERRFI1/SREBF1/SLIT3/TXNIP/KLF2/GAS6/TGFB1/NR3C1/DDIT4/CDKN1A/KLF9/ATP2B1/DUSP1/KLF4/FOSB/FOS/MSN	21
GO:0009636	BP	GO:0009636	response to toxic substance	25/593	262/18723	1.00984e-06	8.32855e-05	6.26979e-05	GPX3/LCN2/CLDN1/APOE/NUPR1/GPX4/TPO/PRDX1/PON2/BMP7/GSTM3/SDC1/EPHX1/ALDH1A1/SLC22A18/PIM1/ALOX5AP/CCL5/CCL4/BCL2/CDKN1A/MT1F/BAX/MT1X/FOS	25
GO:0045444	BP	GO:0045444	fat cell differentiation	23/593	229/18723	1.12726e-06	9.13667e-05	6.87815e-05	LMO3/CCND1/DIO2/LAMB3/ZFP36L1/BMP7/SREBF1/HMGA2/INHBB/ARNTL/RARRES2/PIM1/NR4A2/ZFP36L2/ZFP36/RGS2/ARL4A/FBXO9/TGFB1/PSMB8/KLF4/RORA/NR4A1	23
GO:0002460	BP	GO:0002460	adaptive immune response based on somatic recombination of immune receptors built from immunoglobulin superfamily domains	30/593	356/18723	1.21333e-06	9.51267e-05	7.16121e-05	CLU/CTSH/TMEM98/ANXA1/CD55/EMP2/CFI/RAB27A/TNFSF13B/TNFRSF1B/CD8A/GZMM/CD27/PRF1/HLA-B/MEF2C/TNFAIP3/HLA-DQB1/TRBC1/IL7R/C1QC/C1QB/C1QA/IGHG4/TRBC2/PTPRC/FCER1G/TGFB1/IGHG1/RORA	30
GO:0002253	BP	GO:0002253	activation of immune response	31/593	375/18723	1.21413e-06	9.51267e-05	7.16121e-05	CLU/LGALS3/CD55/CFH/CFI/SLC39A10/ITK/SH2D1A/TRAT1/PYHIN1/PYCARD/PDE4B/CD247/MEF2C/MNDA/HLA-DQB1/TRBC1/CD3E/C1QC/C1QB/C1QA/IGHG4/TRBC2/PTPRC/FCER1G/TYROBP/CMTM3/IGHG1/BCL2/CFD/BAX	31
GO:0072001	BP	GO:0072001	renal system development	27/593	302/18723	1.34316e-06	0.000103512	7.79244e-05	CD24/TACSTD2/SDC4/PAX8/SOX4/CTSH/VEGFA/CITED1/LRRK2/ITGA3/NFIA/LRP2/BMP7/EGR1/EPHA4/ARG2/LRP4/BASP1/SDC1/TIPARP/IFT88/SPRY1/FBN1/MEF2C/BCL2/BAX/PRDM1	27
GO:0050671	BP	GO:0050671	positive regulation of lymphocyte proliferation	17/593	137/18723	1.60252e-06	0.00012021	9.04949e-05	CD24/ANXA1/CD55/SLC39A10/CD320/TNFSF13B/PYCARD/TNFRSF4/MEF2C/CD3E/GPR183/PTPRC/CCL5/LGALS9/BCL2/CDKN1A/PNP	17
GO:0001933	BP	GO:0001933	negative regulation of protein phosphorylation	29/593	342/18723	1.61098e-06	0.00012021	9.04949e-05	CAV1/CAMK2N1/DUSP6/APOE/LRRK2/ERRFI1/BMP7/INPP5J/PTPN13/PARP14/DMD/CD109/DNAJC3/SNX25/SPRY1/PYCARD/SOCS3/RGS2/TNFAIP3/PTPRC/SEMA4D/TGFB1/MYADM/DDIT4/CDKN1A/SH3BP5/DUSP1/GADD45B/BAX	29
GO:0032946	BP	GO:0032946	positive regulation of mononuclear cell proliferation	17/593	138/18723	1.77491e-06	0.000130373	9.81456e-05	CD24/ANXA1/CD55/SLC39A10/CD320/TNFSF13B/PYCARD/TNFRSF4/MEF2C/CD3E/GPR183/PTPRC/CCL5/LGALS9/BCL2/CDKN1A/PNP	17
GO:0060326	BP	GO:0060326	cell chemotaxis	27/593	310/18723	2.21648e-06	0.000160302	0.000120677	CXCL14/MDK/LGALS3/DAPK2/MET/VEGFA/ANXA1/DPP4/CALR/CCL28/MTUS1/NINJ1/RARRES2/IL16/PDE4B/SPI1/CCL3L3/TMSB4X/GPR183/FCER1G/CCL5/CCL4/GAS6/LGALS9/DUSP1/CXCL8/NR4A1	27
GO:0001822	BP	GO:0001822	kidney development	26/593	293/18723	2.41827e-06	0.000172247	0.000129668	CD24/TACSTD2/SDC4/PAX8/SOX4/CTSH/VEGFA/CITED1/LRRK2/ITGA3/LRP2/BMP7/EGR1/EPHA4/ARG2/LRP4/BASP1/SDC1/TIPARP/IFT88/SPRY1/FBN1/MEF2C/BCL2/BAX/PRDM1	26
GO:0002449	BP	GO:0002449	lymphocyte mediated immunity	29/593	350/18723	2.55755e-06	0.000179448	0.00013509	CLU/CTSH/CD55/PRDX1/EMP2/CFI/RAB27A/SH2D1A/SERPINB9/CD96/TNFRSF1B/CD8A/GZMM/CD27/PRF1/HLA-B/HLA-DQB1/TRBC1/IL7R/C1QC/C1QB/C1QA/IGHG4/TRBC2/PTPRC/FCER1G/LGALS9/TGFB1/IGHG1	29
GO:1902105	BP	GO:1902105	regulation of leukocyte differentiation	25/593	279/18723	3.16766e-06	0.000218988	0.000164856	MDK/SOX4/TESC/ANXA1/ZFP36L1/DCSTAMP/FBN1/RUNX3/CD27/RHOH/FGL2/HLA-B/ZFP36L2/IL7R/CD2/C1QC/PTPRC/TYROBP/GAS6/LGALS9/TGFB1/IKZF3/PNP/PRDM1/FOS	25
GO:0016032	BP	GO:0016032	viral process	32/593	415/18723	3.62909e-06	0.000247251	0.000186133	SLPI/CAV1/CTSB/CLDN1/APOE/CD55/DPP4/NFIA/CANX/MGAT4B/SLC20A2/ITGA2/HPN/XPR1/HMGA2/IGF2R/SELPLG/ISG20/TNFRSF4/ZFP36/CCL5/CCL4/PKN2/GAS6/LGALS9/LGALS1/BCL2/TRIM22/MGAT1/DDX3X/IFITM3/CXCL8	32
GO:0010631	BP	GO:0010631	epithelial cell migration	29/593	357/18723	3.7809e-06	0.000252755	0.000190276	TACSTD2/S100A2/LCN2/MET/CTSH/APOE/ID1/VEGFA/ANXA1/ITGA3/DPP4/ANXA3/EMP2/CALR/NRP2/RRAS/ITGA2/ADAMTS9/EPB41L5/GIPC1/SASH1/SPARC/GLIPR2/MEF2C/TMSB4X/PKN2/TGFB1/KLF4/NR4A1	29
GO:0001655	BP	GO:0001655	urogenital system development	28/593	338/18723	3.81741e-06	0.000252755	0.000190276	CD24/TACSTD2/SDC4/PAX8/SOX4/CTSH/VEGFA/CITED1/ANXA1/LRRK2/ITGA3/NFIA/LRP2/BMP7/EGR1/EPHA4/ARG2/LRP4/BASP1/SDC1/TIPARP/IFT88/SPRY1/FBN1/MEF2C/BCL2/BAX/PRDM1	28
GO:0001841	BP	GO:0001841	neural tube formation	14/593	102/18723	4.01174e-06	0.000261933	0.000197185	SDC4/SOX4/SPINT1/PLXNB2/FOLR1/LRP2/BMP7/PRICKLE1/ST14/HECTD1/TCTN1/VASP/TGFB1/PRKACB	14
GO:0030595	BP	GO:0030595	leukocyte chemotaxis	22/593	230/18723	4.29809e-06	0.000275495	0.000207395	MDK/LGALS3/DAPK2/VEGFA/ANXA1/DPP4/CALR/MTUS1/NINJ1/RARRES2/IL16/PDE4B/SPI1/CCL3L3/GPR183/FCER1G/CCL5/CCL4/GAS6/LGALS9/DUSP1/CXCL8	22
GO:0072331	BP	GO:0072331	signal transduction by p53 class mediator	18/593	163/18723	4.3418e-06	0.000275495	0.000207395	PERP/SOX4/MUC1/NUPR1/MYO6/PHLDA3/RPS27L/PYHIN1/PYCARD/SGK1/KMT5A/DDIT4/BCL2/CDKN1A/ATM/CD44/PMAIP1/BAX	18
GO:0072332	BP	GO:0072332	intrinsic apoptotic signaling pathway by p53 class mediator	12/593	76/18723	4.44666e-06	0.000275495	0.000207395	PERP/MUC1/NUPR1/PHLDA3/RPS27L/PYCARD/DDIT4/BCL2/CDKN1A/CD44/PMAIP1/BAX	12
GO:0090132	BP	GO:0090132	epithelium migration	29/593	360/18723	4.45387e-06	0.000275495	0.000207395	TACSTD2/S100A2/LCN2/MET/CTSH/APOE/ID1/VEGFA/ANXA1/ITGA3/DPP4/ANXA3/EMP2/CALR/NRP2/RRAS/ITGA2/ADAMTS9/EPB41L5/GIPC1/SASH1/SPARC/GLIPR2/MEF2C/TMSB4X/PKN2/TGFB1/KLF4/NR4A1	29
GO:0002443	BP	GO:0002443	leukocyte mediated immunity	33/593	440/18723	4.63212e-06	0.0002828	0.000212894	CLU/S100A13/CTSH/CD55/PRDX1/ANXA3/EMP2/CFI/RAB27A/SH2D1A/SERPINB9/CD96/SPI1/TNFRSF1B/CD8A/GZMM/CD27/PRF1/HLA-B/HLA-DQB1/TRBC1/IL7R/C1QC/C1QB/C1QA/IGHG4/TRBC2/PTPRC/FCER1G/TYROBP/LGALS9/TGFB1/IGHG1	33
GO:0045936	BP	GO:0045936	negative regulation of phosphate metabolic process	33/593	441/18723	4.86045e-06	0.000292936	0.000220524	CAV1/LGALS3/CAMK2N1/DUSP6/APOE/NUPR1/APOC1/LRRK2/ERRFI1/BMP7/INPP5J/PTPN13/PARP14/DMD/CD109/DNAJC3/SNX25/SPRY1/PYCARD/SOCS3/RGS2/TNFAIP3/PTPRC/SEMA4D/TGFB1/MYADM/DDIT4/CDKN1A/SH3BP5/DUSP1/GADD45B/PPP1R15A/BAX	33
GO:0010563	BP	GO:0010563	negative regulation of phosphorus metabolic process	33/593	442/18723	5.09911e-06	0.000301641	0.000227078	CAV1/LGALS3/CAMK2N1/DUSP6/APOE/NUPR1/APOC1/LRRK2/ERRFI1/BMP7/INPP5J/PTPN13/PARP14/DMD/CD109/DNAJC3/SNX25/SPRY1/PYCARD/SOCS3/RGS2/TNFAIP3/PTPRC/SEMA4D/TGFB1/MYADM/DDIT4/CDKN1A/SH3BP5/DUSP1/GADD45B/PPP1R15A/BAX	33
GO:0007179	BP	GO:0007179	transforming growth factor beta receptor signaling pathway	20/593	198/18723	5.13322e-06	0.000301641	0.000227078	CAV1/ID1/CITED1/GDF15/HSPA5/ITGA3/FOLR1/LTBP2/LTBP4/GIPC1/VASN/CD109/SNX25/SPRY1/FBN1/SPI1/SDCBP/DAB2/TGFB1/FOS	20
GO:0030890	BP	GO:0030890	positive regulation of B cell proliferation	9/593	42/18723	5.28582e-06	0.000306774	0.000230941	SLC39A10/CD320/TNFSF13B/TNFRSF4/MEF2C/GPR183/PTPRC/BCL2/CDKN1A	9
GO:0060562	BP	GO:0060562	epithelial tube morphogenesis	27/593	325/18723	5.38214e-06	0.000308554	0.000232282	TACSTD2/SDC4/MDK/PAX8/LCN2/SOX4/MET/CTSH/VEGFA/CITED1/SPINT1/PLXNB2/FOLR1/LRP2/BMP7/EPHA4/PRICKLE1/ST14/HECTD1/TCTN1/SPRY1/AREG/MEF2C/VASP/TGFB1/BCL2/PRKACB	27
GO:0042098	BP	GO:0042098	T cell proliferation	20/593	199/18723	5.54138e-06	0.000310533	0.000233771	CD24/SDC4/LGALS3/ANXA1/CD55/CD151/ARG2/TNFSF13B/DOCK8/PYCARD/TNFRSF1B/TNFRSF4/CD3E/PTPRC/CCL5/LGALS9/CCND3/PNP/BAX/MSN	20
GO:0097193	BP	GO:0097193	intrinsic apoptotic signaling pathway	25/593	288/18723	5.56402e-06	0.000310533	0.000233771	CLU/CD24/CAV1/PERP/DAPK2/MUC1/NUPR1/LRRK2/PHLDA3/RPS27L/PYCARD/TNFRSF1B/SLC9A3R1/DDIT4/BCL2/CDKN1A/ATM/PLAUR/CD44/PPP1R15A/DDX3X/PMAIP1/CYLD/HERPUD1/BAX	25
GO:0070665	BP	GO:0070665	positive regulation of leukocyte proliferation	17/593	150/18723	5.61482e-06	0.000310533	0.000233771	CD24/ANXA1/CD55/SLC39A10/CD320/TNFSF13B/PYCARD/TNFRSF4/MEF2C/CD3E/GPR183/PTPRC/CCL5/LGALS9/BCL2/CDKN1A/PNP	17
GO:0090130	BP	GO:0090130	tissue migration	29/593	365/18723	5.82387e-06	0.000313342	0.000235886	TACSTD2/S100A2/LCN2/MET/CTSH/APOE/ID1/VEGFA/ANXA1/ITGA3/DPP4/ANXA3/EMP2/CALR/NRP2/RRAS/ITGA2/ADAMTS9/EPB41L5/GIPC1/SASH1/SPARC/GLIPR2/MEF2C/TMSB4X/PKN2/TGFB1/KLF4/NR4A1	29
GO:0070373	BP	GO:0070373	negative regulation of ERK1 and ERK2 cascade	12/593	78/18723	5.87692e-06	0.000313342	0.000235886	LMO3/CAMK2N1/DUSP6/ERRFI1/SPRY1/TBC1D10C/PTPRC/ATF3/SLC9A3R1/DUSP4/DUSP1/KLF4	12
GO:0002687	BP	GO:0002687	positive regulation of leukocyte migration	16/593	135/18723	5.9115e-06	0.000313342	0.000235886	MDK/LGALS3/DAPK2/VEGFA/CALR/ITGA2/RARRES2/DOCK8/PYCARD/SPI1/CCL5/CCL4/GAS6/TNFRSF18/LGALS9/CXCL8	16
GO:0042326	BP	GO:0042326	negative regulation of phosphorylation	30/593	385/18723	5.93223e-06	0.000313342	0.000235886	CAV1/CAMK2N1/DUSP6/APOE/NUPR1/LRRK2/ERRFI1/BMP7/INPP5J/PTPN13/PARP14/DMD/CD109/DNAJC3/SNX25/SPRY1/PYCARD/SOCS3/RGS2/TNFAIP3/PTPRC/SEMA4D/TGFB1/MYADM/DDIT4/CDKN1A/SH3BP5/DUSP1/GADD45B/BAX	30
GO:0044403	BP	GO:0044403	biological process involved in symbiotic interaction	25/593	290/18723	6.28293e-06	0.000322616	0.000242868	FN1/CAV1/CTSB/CLDN1/APOE/CD55/DPP4/SLC20A2/ITGA2/HPN/XPR1/HMGA2/INHBB/IGF2R/SELPLG/SERPINB9/TNFRSF4/CCL5/CCL4/GAS6/LGALS9/LGALS1/TRIM22/IFITM3/CXCL8	25
GO:0071887	BP	GO:0071887	leukocyte apoptotic process	14/593	106/18723	6.35055e-06	0.000322616	0.000242868	LGALS3/ANXA1/SLC39A10/ARG2/DOCK8/CD27/MEF2C/CD3G/IL7R/TSC22D3/CCL5/GAS6/LGALS9/BAX	14
GO:0070372	BP	GO:0070372	regulation of ERK1 and ERK2 cascade	26/593	309/18723	6.37901e-06	0.000322616	0.000242868	FN1/LMO3/CAMK2N1/DUSP6/APOE/CHI3L1/ERRFI1/RRAS/SPRY1/GLIPR2/PYCARD/TBC1D10C/CCL3L3/GPR183/PTPRC/CCL5/CCL4/GAS6/LGALS9/ATF3/TGFB1/SLC9A3R1/DUSP4/CD44/DUSP1/KLF4	26
GO:1903706	BP	GO:1903706	regulation of hemopoiesis	29/593	367/18723	6.47265e-06	0.000322616	0.000242868	MDK/SOX4/TESC/ANXA1/ZFP36L1/DCSTAMP/FBN1/RUNX3/SPI1/CD27/RHOH/FGL2/NFKBIA/HLA-B/MEF2C/ZFP36L2/ZFP36/IL7R/CD2/C1QC/PTPRC/TYROBP/GAS6/LGALS9/TGFB1/IKZF3/PNP/PRDM1/FOS	29
GO:0042771	BP	GO:0042771	intrinsic apoptotic signaling pathway in response to DNA damage by p53 class mediator	9/593	43/18723	6.4989e-06	0.000322616	0.000242868	MUC1/NUPR1/PHLDA3/RPS27L/PYCARD/DDIT4/BCL2/CDKN1A/CD44	9
GO:0001704	BP	GO:0001704	formation of primary germ layer	15/593	121/18723	6.61133e-06	0.000322616	0.000242868	FN1/COL8A1/ITGA3/LAMB3/GJA1/DUSP5/BMP7/ITGA2/HMGA2/HSBP1/EPB41L5/DUSP2/DUSP4/DUSP1/KLF4	15
GO:0001838	BP	GO:0001838	embryonic epithelial tube formation	15/593	121/18723	6.61133e-06	0.000322616	0.000242868	SDC4/PAX8/SOX4/SPINT1/PLXNB2/FOLR1/LRP2/BMP7/PRICKLE1/ST14/HECTD1/TCTN1/VASP/TGFB1/PRKACB	15
GO:0036336	BP	GO:0036336	dendritic cell migration	8/593	33/18723	6.65683e-06	0.000322616	0.000242868	CALR/EPS8/DOCK8/SPI1/GPR183/CCL5/GAS6/LGALS9	8
GO:0034976	BP	GO:0034976	response to endoplasmic reticulum stress	23/593	256/18723	7.46705e-06	0.00035819	0.000269648	CLU/CAV1/CCND1/AGR2/HSP90B1/NUPR1/LRRK2/HSPA5/CANX/CALR/CREB3L2/DNAJC3/ERLIN2/RHBDD2/MANF/ATF3/BCL2/PPP1R15A/DDX3X/PMAIP1/CXCL8/HERPUD1/BAX	23
GO:0010810	BP	GO:0010810	regulation of cell-substrate adhesion	21/593	221/18723	7.8351e-06	0.000372049	0.000280081	FN1/TACSTD2/SDC4/MDK/AGR2/VEGFA/CCDC80/COL8A1/ITGA3/EMP2/CALR/CCL28/RRAS/LIMCH1/EPB41L5/SPOCK1/CD3E/PLAU/MYADM/LGALS1/BCL2	21
GO:0010811	BP	GO:0010811	positive regulation of cell-substrate adhesion	15/593	123/18723	8.09966e-06	0.000380765	0.000286643	FN1/SDC4/MDK/AGR2/VEGFA/CCDC80/COL8A1/ITGA3/EMP2/CALR/CCL28/RRAS/EPB41L5/CD3E/MYADM	15
GO:0070232	BP	GO:0070232	regulation of T cell apoptotic process	8/593	34/18723	8.46521e-06	0.000394009	0.000296613	LGALS3/ARG2/DOCK8/CD27/IL7R/TSC22D3/CCL5/LGALS9	8
GO:0050920	BP	GO:0050920	regulation of chemotaxis	21/593	223/18723	9.00714e-06	0.000415123	0.000312508	MDK/DAPK2/MET/VEGFA/DPP4/CALR/MTUS1/ITGA2/RARRES2/IL16/SPI1/TMSB4X/GPR183/CCL5/CCL4/GAS6/LGALS9/SEMA4D/TGFB1/DUSP1/CXCL8	21
GO:0002683	BP	GO:0002683	negative regulation of immune system process	32/593	434/18723	9.1445e-06	0.000417362	0.000314193	SDC4/MDK/LGALS3/ANXA1/CD55/DPP4/CCL28/ARG2/PARP14/FBN1/SH2D1A/SERPINB9/CD96/RUNX3/TBC1D10C/SPI1/FGL2/TIGIT/HLA-B/MNDA/LST1/TNFAIP3/CST7/IL7R/C1QC/PTPRC/TSC22D3/TYROBP/LGALS9/TGFB1/ATM/DUSP1	32
GO:0018958	BP	GO:0018958	phenol-containing compound metabolic process	14/593	110/18723	9.82731e-06	0.000444213	0.000334407	TG/CTSB/PAX8/IYD/CITED1/CPQ/TPO/DIO2/FOXE1/HPN/GIPC1/DUOXA2/NR4A2/BCL2	14
GO:2001233	BP	GO:2001233	regulation of apoptotic signaling pathway	28/593	356/18723	1.01667e-05	0.000451709	0.00034005	CLU/CAV1/LGALS3/DAPK2/TPD52L1/TNFRSF12A/CTSH/MUC1/NUPR1/LRRK2/INHBB/STRADB/ZMYND11/PYCARD/NR4A2/TNFAIP3/PTPRC/ATF3/TNFSF10/SLC9A3R1/BCL2/PLAUR/CD44/DDX3X/PMAIP1/CYLD/HERPUD1/BAX	28
GO:0050921	BP	GO:0050921	positive regulation of chemotaxis	16/593	141/18723	1.03657e-05	0.000451709	0.00034005	MDK/DAPK2/MET/VEGFA/CALR/ITGA2/RARRES2/IL16/SPI1/TMSB4X/CCL5/CCL4/GAS6/LGALS9/TGFB1/CXCL8	16
GO:1902107	BP	GO:1902107	positive regulation of leukocyte differentiation	17/593	157/18723	1.03775e-05	0.000451709	0.00034005	MDK/SOX4/TESC/ANXA1/ZFP36L1/DCSTAMP/RUNX3/CD27/RHOH/IL7R/PTPRC/TYROBP/GAS6/LGALS9/TGFB1/PNP/FOS	17
GO:1903708	BP	GO:1903708	positive regulation of hemopoiesis	17/593	157/18723	1.03775e-05	0.000451709	0.00034005	MDK/SOX4/TESC/ANXA1/ZFP36L1/DCSTAMP/RUNX3/CD27/RHOH/IL7R/PTPRC/TYROBP/GAS6/LGALS9/TGFB1/PNP/FOS	17
GO:0031294	BP	GO:0031294	lymphocyte costimulation	9/593	46/18723	1.16661e-05	0.000503142	0.000378769	CD24/CAV1/DPP4/CD320/TNFSF13B/MAP3K8/ICOS/CD3E/LGALS1	9
GO:0002357	BP	GO:0002357	defense response to tumor cell	5/593	11/18723	1.23576e-05	0.000520822	0.000392078	RBMS3/ABI3/SPI1/PRF1/KLF4	5
GO:0034975	BP	GO:0034975	protein folding in endoplasmic reticulum	5/593	11/18723	1.23576e-05	0.000520822	0.000392078	HSP90B1/HSPA5/CANX/CALR/DNAJC3	5
GO:0070555	BP	GO:0070555	response to interleukin-1	16/593	143/18723	1.24084e-05	0.000520822	0.000392078	LCN2/CHI3L1/CITED1/ANXA1/EGR1/MAPK13/PYCARD/KLF2/CCL3L3/CCL5/CCL4/LGALS9/GBP3/GBP2/RORA/CXCL8	16
GO:0007565	BP	GO:0007565	female pregnancy	19/593	193/18723	1.2731e-05	0.000529633	0.000398712	CTSB/VEGFA/TIMP1/ITGA3/EMP2/PAM/GJA1/CALR/ITGA2/JUNB/RGS2/ARHGDIB/LGALS9/BCL2/SLC38A1/SLC38A2/FOSB/PRDM1/FOS	19
GO:0017015	BP	GO:0017015	regulation of transforming growth factor beta receptor signaling pathway	15/593	128/18723	1.31999e-05	0.000544324	0.000409771	CAV1/CITED1/HSPA5/ITGA3/FOLR1/LTBP4/GIPC1/VASN/CD109/SNX25/SPRY1/FBN1/SDCBP/DAB2/TGFB1	15
GO:0042060	BP	GO:0042060	wound healing	31/593	422/18723	1.35543e-05	0.000554074	0.000417111	FN1/CAV1/SDC4/SERPINA1/TNFRSF12A/CLDN1/APOE/VEGFA/TIMP1/PROS1/ANXA1/CD151/DCBLD2/GJA1/PPL/ITGA2/ENTPD1/SDC1/RAB27A/CD109/SPARC/ANXA6/TNFAIP3/FCER1G/GAS6/PLAU/TGFB1/CLIC1/CDKN1A/PLAUR/CD44	31
GO:0008630	BP	GO:0008630	intrinsic apoptotic signaling pathway in response to DNA damage	13/593	99/18723	1.44299e-05	0.000584784	0.00044023	CLU/MUC1/NUPR1/PHLDA3/RPS27L/PYCARD/TNFRSF1B/DDIT4/BCL2/CDKN1A/ATM/CD44/BAX	13
GO:0048608	BP	GO:0048608	reproductive structure development	31/593	424/18723	1.48717e-05	0.000597539	0.000449832	KRT19/CTSB/CCND1/TESC/VEGFA/CITED1/NUPR1/ANXA1/HSPA5/SPINT1/PHLDA2/ZFP36L1/GJA1/LRP2/RHOBTB3/BMP7/INHBB/HSD17B4/NRIP1/BASP1/ST14/SDC1/HECTD1/TIPARP/SLIT3/SOCS3/JUNB/TNFSF10/BCL2/BAX/PRDM1	31
GO:0070227	BP	GO:0070227	lymphocyte apoptotic process	11/593	72/18723	1.53575e-05	0.000611827	0.000460588	LGALS3/SLC39A10/ARG2/DOCK8/CD27/CD3G/IL7R/TSC22D3/CCL5/LGALS9/BAX	11
GO:0071674	BP	GO:0071674	mononuclear cell migration	19/593	196/18723	1.58565e-05	0.0006264	0.000471559	MDK/LGALS3/ANXA1/CALR/EPS8/ECM1/RARRES2/DOCK8/PYCARD/SPI1/CCL3L3/GPR183/CCL5/CCL4/ITGAL/GAS6/LGALS9/DUSP1/MSN	19
GO:0071675	BP	GO:0071675	regulation of mononuclear cell migration	14/593	115/18723	1.6472e-05	0.00064529	0.000485779	MDK/LGALS3/CALR/ECM1/RARRES2/DOCK8/PYCARD/SPI1/CCL5/CCL4/GAS6/LGALS9/DUSP1/MSN	14
GO:0061458	BP	GO:0061458	reproductive system development	31/593	427/18723	1.70683e-05	0.000663123	0.000499204	KRT19/CTSB/CCND1/TESC/VEGFA/CITED1/NUPR1/ANXA1/HSPA5/SPINT1/PHLDA2/ZFP36L1/GJA1/LRP2/RHOBTB3/BMP7/INHBB/HSD17B4/NRIP1/BASP1/ST14/SDC1/HECTD1/TIPARP/SLIT3/SOCS3/JUNB/TNFSF10/BCL2/BAX/PRDM1	31
GO:1903844	BP	GO:1903844	regulation of cellular response to transforming growth factor beta stimulus	15/593	131/18723	1.74756e-05	0.00067257	0.000506316	CAV1/CITED1/HSPA5/ITGA3/FOLR1/LTBP4/GIPC1/VASN/CD109/SNX25/SPRY1/FBN1/SDCBP/DAB2/TGFB1	15
GO:0016331	BP	GO:0016331	morphogenesis of embryonic epithelium	16/593	147/18723	1.75976e-05	0.00067257	0.000506316	SDC4/PAX8/SOX4/SPINT1/PLXNB2/FOLR1/LRP2/BMP7/PRICKLE1/ST14/EPB41L5/HECTD1/TCTN1/VASP/TGFB1/PRKACB	16
GO:0001776	BP	GO:0001776	leukocyte homeostasis	12/593	87/18723	1.8526e-05	0.000702344	0.00052873	ANXA1/SIT1/TNFSF13B/PDE4B/MEF2C/TNFAIP3/GPR183/TSC22D3/LGALS9/BCL2/PMAIP1/BAX	12
GO:0070233	BP	GO:0070233	negative regulation of T cell apoptotic process	6/593	19/18723	1.87735e-05	0.000706034	0.000531507	ARG2/DOCK8/CD27/IL7R/TSC22D3/CCL5	6
GO:0072175	BP	GO:0072175	epithelial tube formation	15/593	132/18723	1.91511e-05	0.000709362	0.000534013	SDC4/PAX8/SOX4/SPINT1/PLXNB2/FOLR1/LRP2/BMP7/PRICKLE1/ST14/HECTD1/TCTN1/VASP/TGFB1/PRKACB	15
GO:0035148	BP	GO:0035148	tube formation	16/593	148/18723	1.91638e-05	0.000709362	0.000534013	SDC4/PAX8/SOX4/VEGFA/SPINT1/PLXNB2/FOLR1/LRP2/BMP7/PRICKLE1/ST14/HECTD1/TCTN1/VASP/TGFB1/PRKACB	16
GO:0034113	BP	GO:0034113	heterotypic cell-cell adhesion	10/593	61/18723	1.98084e-05	0.000727496	0.000547664	PERP/BMP7/NINJ1/CD2/PTPRC/DSC2/MYADM/CD44/CD58/KLF4	10
GO:0070231	BP	GO:0070231	T cell apoptotic process	9/593	50/18723	2.37013e-05	0.000863721	0.000650215	LGALS3/ARG2/DOCK8/CD27/IL7R/TSC22D3/CCL5/LGALS9/BAX	9
GO:0044409	BP	GO:0044409	entry into host	16/593	151/18723	2.46307e-05	0.000890685	0.000670514	CAV1/CTSB/CLDN1/CD55/DPP4/SLC20A2/ITGA2/XPR1/SELPLG/TNFRSF4/GAS6/LGALS9/LGALS1/TRIM22/IFITM3/CXCL8	16
GO:0051403	BP	GO:0051403	stress-activated MAPK cascade	21/593	239/18723	2.57767e-05	0.000925009	0.000696353	CRYAB/IGFBP6/TPD52L1/VEGFA/LRRK2/PRDX1/ZFP36L1/STRADB/MAPK13/SASH1/ZMYND11/TNIK/PYCARD/SPI1/CD27/SDCBP/ZFP36/LGALS9/DUSP1/GADD45B/CYLD	21
GO:0050871	BP	GO:0050871	positive regulation of B cell activation	16/593	152/18723	2.6738e-05	0.000952236	0.00071685	SLC39A10/CD320/TNFSF13B/SH3KBP1/CD27/TNFRSF4/MEF2C/TRBC1/GPR183/IGHG4/TRBC2/PTPRC/TGFB1/IGHG1/BCL2/CDKN1A	16
GO:0019058	BP	GO:0019058	viral life cycle	25/593	317/18723	2.87585e-05	0.00101649	0.000765224	SLPI/CAV1/CTSB/CLDN1/APOE/CD55/DPP4/NFIA/SLC20A2/ITGA2/XPR1/HMGA2/SELPLG/ISG20/TNFRSF4/CCL5/PKN2/GAS6/LGALS9/LGALS1/BCL2/TRIM22/DDX3X/IFITM3/CXCL8	25
GO:0002695	BP	GO:0002695	negative regulation of leukocyte activation	18/593	187/18723	2.89898e-05	0.00101702	0.000765623	SDC4/MDK/LGALS3/ANXA1/ARG2/RUNX3/TBC1D10C/SPI1/FGL2/TIGIT/MNDA/LST1/TNFAIP3/CST7/PTPRC/TYROBP/LGALS9/ATM	18
GO:0007492	BP	GO:0007492	endoderm development	11/593	77/18723	2.94307e-05	0.00102484	0.00077151	FN1/COL8A1/LAMB3/ZFP36L1/DUSP5/HMGA2/HSBP1/EPB41L5/DUSP2/DUSP4/DUSP1	11
GO:0019882	BP	GO:0019882	antigen processing and presentation	13/593	106/18723	3.03288e-05	0.00104835	0.000789207	CTSH/RAB34/CALR/RAB27A/PYCARD/CD8A/FGL2/HLA-B/HLA-DQB1/FCER1G/RAB8B/PSMB8/CTSS	13
GO:0002688	BP	GO:0002688	regulation of leukocyte chemotaxis	14/593	122/18723	3.23079e-05	0.00110861	0.000834569	MDK/DAPK2/VEGFA/DPP4/CALR/MTUS1/RARRES2/SPI1/CCL5/CCL4/GAS6/LGALS9/DUSP1/CXCL8	14
GO:0070229	BP	GO:0070229	negative regulation of lymphocyte apoptotic process	7/593	30/18723	3.32931e-05	0.00113414	0.000853786	SLC39A10/ARG2/DOCK8/CD27/IL7R/TSC22D3/CCL5	7
GO:0071496	BP	GO:0071496	cellular response to external stimulus	25/593	320/18723	3.36227e-05	0.00113712	0.000856035	LCN2/DAPL1/LRRK2/HSPA5/KCNJ2/ATP1A1/GJA1/FOLR1/SREBF1/MAP3K1/ITGA2/XPR1/INHBB/PIM1/NR4A2/PTPRC/GAS6/ATF3/BCL2/CDKN1A/ATP2B1/PMAIP1/GABARAPL1/SLC38A2/FOS	25
GO:0001909	BP	GO:0001909	leukocyte mediated cytotoxicity	14/593	124/18723	3.87858e-05	0.00130237	0.000980434	CTSH/PRDX1/EMP2/RAB27A/SH2D1A/SERPINB9/SPI1/GZMM/PRF1/HLA-B/IL7R/PTPRC/TYROBP/LGALS9	14
GO:0045619	BP	GO:0045619	regulation of lymphocyte differentiation	17/593	174/18723	3.97068e-05	0.00132384	0.000996598	MDK/SOX4/ANXA1/ZFP36L1/RUNX3/CD27/RHOH/FGL2/ZFP36L2/IL7R/CD2/PTPRC/GAS6/LGALS9/IKZF3/PNP/PRDM1	17
GO:0014020	BP	GO:0014020	primary neural tube formation	12/593	94/18723	4.07944e-05	0.00134993	0.00101624	SDC4/SPINT1/PLXNB2/FOLR1/LRP2/BMP7/PRICKLE1/ST14/HECTD1/VASP/TGFB1/PRKACB	12
GO:0008544	BP	GO:0008544	epidermis development	25/593	324/18723	4.12598e-05	0.00134993	0.00101624	CST6/ASAH1/ANXA1/LAMB3/ZFP36L1/FOXE1/MYO6/PPL/CRABP2/ERRFI1/ZBED2/SCEL/LRP4/ST14/CD109/FLNB/AGPAT2/EMP1/NAB2/TXNIP/ZFP36/FABP5/SLC9A3R1/BCL2/KLF4	25
GO:0050866	BP	GO:0050866	negative regulation of cell activation	19/593	210/18723	4.15115e-05	0.00134993	0.00101624	SDC4/MDK/LGALS3/APOE/ANXA1/ARG2/RUNX3/TBC1D10C/SPI1/FGL2/TIGIT/MNDA/LST1/TNFAIP3/CST7/PTPRC/TYROBP/LGALS9/ATM	19
GO:0030183	BP	GO:0030183	B cell differentiation	15/593	141/18723	4.18864e-05	0.00134993	0.00101624	ZFP36L1/TNFSF13B/IRF8/KLF6/SPI1/CD27/ITM2A/ZFP36L2/GPR183/PTPRC/LGALS1/BCL2/ATM/IKZF3/BAX	15
GO:0031098	BP	GO:0031098	stress-activated protein kinase signaling cascade	21/593	247/18723	4.1925e-05	0.00134993	0.00101624	CRYAB/IGFBP6/TPD52L1/VEGFA/LRRK2/PRDX1/ZFP36L1/STRADB/MAPK13/SASH1/ZMYND11/TNIK/PYCARD/SPI1/CD27/SDCBP/ZFP36/LGALS9/DUSP1/GADD45B/CYLD	21
GO:0001706	BP	GO:0001706	endoderm formation	9/593	54/18723	4.49497e-05	0.00143747	0.00108214	FN1/COL8A1/LAMB3/DUSP5/HMGA2/HSBP1/DUSP2/DUSP4/DUSP1	9
GO:0010634	BP	GO:0010634	positive regulation of epithelial cell migration	17/593	176/18723	4.59212e-05	0.00145862	0.00109806	LCN2/MET/CTSH/VEGFA/ANXA1/ITGA3/ANXA3/CALR/NRP2/RRAS/ITGA2/EPB41L5/SASH1/SPARC/GLIPR2/TMSB4X/TGFB1	17
GO:2001235	BP	GO:2001235	positive regulation of apoptotic signaling pathway	14/593	126/18723	4.63741e-05	0.00146312	0.00110145	CAV1/TPD52L1/TNFRSF12A/CTSH/NUPR1/INHBB/PYCARD/PTPRC/ATF3/TNFSF10/SLC9A3R1/PMAIP1/CYLD/BAX	14
GO:0009615	BP	GO:0009615	response to virus	27/593	367/18723	4.71184e-05	0.00147669	0.00111166	CLU/NPC2/DDX17/XPR1/HMGA2/ZMYND11/DNAJC3/PYCARD/FGL2/ISG20/PRF1/TNFAIP3/PTPRC/CCL5/CCL4/AP1S1/LGALS9/GBP3/DDIT4/BCL2/TRIM22/DDX3X/IFI44L/PMAIP1/IFITM3/BAX/STMN1	27
GO:0031667	BP	GO:0031667	response to nutrient levels	32/593	474/18723	5.19304e-05	0.00161607	0.00121659	LCN2/CCND1/SORD/DAPL1/APOE/GDF15/LRRK2/HSPA5/PCSK1N/FOLR1/CCL28/BMP7/SREBF1/ITGA2/LIPG/XPR1/INHBB/POR/RARRES2/SPARC/PIM1/ZFP36/CD3E/GAS6/ATF3/EIF4EBP1/BCL2/CDKN1A/ATP2B1/PMAIP1/GABARAPL1/SLC38A2	32
GO:0038066	BP	GO:0038066	p38MAPK cascade	9/593	55/18723	5.22534e-05	0.00161607	0.00121659	VEGFA/ZFP36L1/SASH1/SPI1/ZFP36/LGALS9/DUSP1/GADD45B/CYLD	9
GO:0001892	BP	GO:0001892	embryonic placenta development	11/593	82/18723	5.34715e-05	0.00162366	0.00122231	KRT19/CITED1/SPINT1/PHLDA2/ZFP36L1/BMP7/ST14/HECTD1/SOCS3/JUNB/PRDM1	11
GO:1905897	BP	GO:1905897	regulation of response to endoplasmic reticulum stress	11/593	82/18723	5.34715e-05	0.00162366	0.00122231	CLU/CAV1/AGR2/NUPR1/LRRK2/HSPA5/MANF/PPP1R15A/PMAIP1/HERPUD1/BAX	11
GO:0046718	BP	GO:0046718	viral entry into host cell	15/593	144/18723	5.3535e-05	0.00162366	0.00122231	CAV1/CTSB/CLDN1/CD55/DPP4/SLC20A2/ITGA2/XPR1/SELPLG/TNFRSF4/GAS6/LGALS9/LGALS1/TRIM22/IFITM3	15
GO:0022408	BP	GO:0022408	negative regulation of cell-cell adhesion	18/593	196/18723	5.40469e-05	0.00162868	0.00122608	SDC4/MDK/LGALS3/VEGFA/ANXA1/MUC21/CCL28/ARG2/EPB41L5/RUNX3/SPI1/FGL2/TIGIT/FXYD5/LGALS9/TGFB1/MYADM/KLF4	18
GO:0048872	BP	GO:0048872	homeostasis of number of cells	22/593	272/18723	5.88932e-05	0.00176342	0.00132752	SOX4/VEGFA/ANXA1/PRDX1/OCIAD2/ZFP36L1/SIT1/TNFSF13B/IKZF1/PDE4B/SPI1/KLF2/MEF2C/ZFP36/TNFAIP3/IL7R/GPR183/TSC22D3/LGALS9/BCL2/PMAIP1/BAX	22
GO:0071347	BP	GO:0071347	cellular response to interleukin-1	13/593	113/18723	5.98002e-05	0.00177925	0.00133943	LCN2/CHI3L1/EGR1/MAPK13/PYCARD/KLF2/CCL3L3/CCL5/CCL4/GBP3/GBP2/RORA/CXCL8	13
GO:0071385	BP	GO:0071385	cellular response to glucocorticoid stimulus	9/593	56/18723	6.05329e-05	0.00178103	0.00134077	ANXA1/ZFP36L1/ERRFI1/ZFP36L2/ZFP36/NR3C1/DDIT4/KLF9/ATP2B1	9
GO:0010632	BP	GO:0010632	regulation of epithelial cell migration	23/593	292/18723	6.06179e-05	0.00178103	0.00134077	TACSTD2/LCN2/MET/CTSH/APOE/VEGFA/ANXA1/ITGA3/ANXA3/EMP2/CALR/NRP2/RRAS/ITGA2/ADAMTS9/EPB41L5/SASH1/SPARC/GLIPR2/MEF2C/TMSB4X/TGFB1/KLF4	23
GO:0031295	BP	GO:0031295	T cell costimulation	8/593	44/18723	6.25246e-05	0.00182564	0.00137435	CD24/CAV1/DPP4/TNFSF13B/MAP3K8/ICOS/CD3E/LGALS1	8
GO:0048762	BP	GO:0048762	mesenchymal cell differentiation	20/593	236/18723	6.63832e-05	0.00192634	0.00145016	FN1/MDK/FOLR1/NRP2/BMP7/HPN/DDX17/HMGA2/EPB41L5/VASN/SPRY1/GLIPR2/ANXA6/SDCBP/MEF2C/DAB2/SEMA4D/TGFB1/BCL2/S100A4	20
GO:0051604	BP	GO:0051604	protein maturation	23/593	294/18723	6.72832e-05	0.00193918	0.00145983	PERP/SOX4/TESC/CTSH/TMEM98/LRRK2/PCSK1N/GCSH/PCSK2/CALR/CLN5/ECE1/HPN/SCG5/DUOXA2/PYCARD/CST7/ASPH/SEC11C/PLAU/PGK1/PRKACB/CTSS	23
GO:2001242	BP	GO:2001242	regulation of intrinsic apoptotic signaling pathway	16/593	164/18723	6.76507e-05	0.00193918	0.00145983	CLU/CAV1/DAPK2/MUC1/NUPR1/LRRK2/PYCARD/SLC9A3R1/BCL2/PLAUR/CD44/DDX3X/PMAIP1/CYLD/HERPUD1/BAX	16
GO:0097191	BP	GO:0097191	extrinsic apoptotic signaling pathway	19/593	219/18723	7.33481e-05	0.00208975	0.00157318	CAV1/LGALS3/TNFRSF12A/STRADB/ZMYND11/PYCARD/SPI1/TNFRSF1B/CD27/TNFAIP3/PTPRC/ATF3/TGFB1/TNFSF10/BCL2/DDX3X/PMAIP1/CYLD/BAX	19
GO:0042551	BP	GO:0042551	neuron maturation	8/593	45/18723	7.39565e-05	0.00209439	0.00157667	LRRK2/MTCH1/CLN5/AGRN/NRCAM/NR4A2/C1QA/BCL2	8
GO:0009410	BP	GO:0009410	response to xenobiotic stimulus	31/593	462/18723	7.58762e-05	0.00213589	0.00160791	MDK/LCN2/SORD/DUSP6/ANXA1/HSPA5/ITGA3/ATP1A1/PAM/MYO6/CALR/SREBF1/GSTM3/ITGA2/TPMT/HMGA2/POR/PARP4/EPHX1/AGPAT2/PDE4B/TXNIP/MEF2C/GAS6/LGALS1/BCL2/CDKN1A/PNP/RORA/FOSB/FOS	31
GO:0044706	BP	GO:0044706	multi-multicellular organism process	19/593	220/18723	7.79653e-05	0.00217095	0.0016343	CTSB/VEGFA/TIMP1/ITGA3/EMP2/PAM/GJA1/CALR/ITGA2/JUNB/RGS2/ARHGDIB/LGALS9/BCL2/SLC38A1/SLC38A2/FOSB/PRDM1/FOS	19
GO:0034329	BP	GO:0034329	cell junction assembly	29/593	420/18723	7.80451e-05	0.00217095	0.0016343	FN1/CAV1/CLDN7/SDC4/NTRK2/CLDN1/VEGFA/CLDN16/FLRT3/IGFN1/PLXNB2/GABRB2/GJA1/LIMCH1/LSR/ITGA2/CDH6/AGRN/LRP4/EPB41L5/NRCAM/MARVELD2/MYO9A/ABI3/SDCBP/MEF2C/PKN2/SEMA4D/BCL2	29
GO:0060561	BP	GO:0060561	apoptotic process involved in morphogenesis	6/593	24/18723	8.13617e-05	0.00224989	0.00169373	PAX8/CRYAB/BMP7/SPI1/TNFRSF1B/BAX	6
GO:0043542	BP	GO:0043542	endothelial cell migration	22/593	279/18723	8.57442e-05	0.00235642	0.00177393	S100A2/LCN2/MET/APOE/ID1/VEGFA/ANXA1/DPP4/ANXA3/EMP2/CALR/NRP2/RRAS/ADAMTS9/GIPC1/SASH1/SPARC/MEF2C/TMSB4X/TGFB1/KLF4/NR4A1	22
GO:0030330	BP	GO:0030330	DNA damage response, signal transduction by p53 class mediator	10/593	72/18723	8.62168e-05	0.00235642	0.00177393	SOX4/MUC1/MYO6/RPS27L/PYHIN1/KMT5A/CDKN1A/ATM/CD44/PMAIP1	10
GO:2000107	BP	GO:2000107	negative regulation of leukocyte apoptotic process	8/593	46/18723	8.70702e-05	0.00236599	0.00178114	SLC39A10/ARG2/DOCK8/CD27/IL7R/TSC22D3/CCL5/GAS6	8
GO:0000302	BP	GO:0000302	response to reactive oxygen species	19/593	222/18723	8.7978e-05	0.00237692	0.00178937	LCN2/CRYAB/MET/APOE/ANXA1/LRRK2/PRDX1/BMP7/SDC1/MAPK13/TXNIP/KLF2/AREG/TNFAIP3/BCL2/DUSP1/KLF4/TRA2B/FOS	19
GO:0071383	BP	GO:0071383	cellular response to steroid hormone stimulus	18/593	204/18723	9.08023e-05	0.00243921	0.00183625	LMO3/ANXA1/ATP1A1/ZFP36L1/CALR/ERRFI1/BMP7/DDX17/HMGA2/ARNTL/RXRG/ZFP36L2/ZFP36/DAB2/NR3C1/DDIT4/KLF9/ATP2B1	18
GO:0002764	BP	GO:0002764	immune response-regulating signaling pathway	31/593	468/18723	9.60578e-05	0.00256573	0.0019315	CD24/CAV1/LGALS3/CTSH/SLC39A10/MAP3K1/NINJ1/ITK/SH2D1A/TRAT1/PDE4B/CD247/NFKBIA/MEF2C/MNDA/TNFAIP3/HLA-DQB1/TRBC1/CD3E/IGHG4/TRBC2/PTPRC/FCER1G/TYROBP/CMTM3/IGHG1/BCL2/DDX3X/CTSS/CYLD/BAX	31
GO:0021915	BP	GO:0021915	neural tube development	15/593	152/18723	9.95226e-05	0.00264325	0.00198986	SDC4/SOX4/SPINT1/ZFP36L1/PLXNB2/FOLR1/LRP2/BMP7/PRICKLE1/ST14/HECTD1/TCTN1/VASP/TGFB1/PRKACB	15
GO:0002237	BP	GO:0002237	response to molecule of bacterial origin	26/593	363/18723	0.000100484	0.0026538	0.0019978	CD24/SLPI/LCN2/CLDN1/CITED1/CD55/GJA1/SASH1/SPARC/LY86/IRF8/CD96/PYCARD/PDE4B/SPI1/TNFRSF1B/NFKBIA/MEF2C/ZFP36/TNFAIP3/CCL5/LGALS9/TGFB1/CXCL8/NR4A1/FOS	26
GO:1901163	BP	GO:1901163	regulation of trophoblast cell migration	5/593	16/18723	0.000102404	0.002671	0.00201075	VEGFA/TIMP1/GJA1/CALR/ARHGDIB	5
GO:0001843	BP	GO:0001843	neural tube closure	11/593	88/18723	0.000103001	0.002671	0.00201075	SDC4/SPINT1/PLXNB2/FOLR1/LRP2/PRICKLE1/ST14/HECTD1/VASP/TGFB1/PRKACB	11
GO:0032496	BP	GO:0032496	response to lipopolysaccharide	25/593	343/18723	0.000103335	0.002671	0.00201075	SLPI/LCN2/CLDN1/CITED1/CD55/GJA1/SASH1/SPARC/LY86/IRF8/CD96/PYCARD/PDE4B/SPI1/TNFRSF1B/NFKBIA/MEF2C/ZFP36/TNFAIP3/CCL5/LGALS9/TGFB1/CXCL8/NR4A1/FOS	25
GO:0043588	BP	GO:0043588	skin development	21/593	263/18723	0.000103408	0.002671	0.00201075	ASAH1/MET/CLDN1/ANXA1/ITGA3/ZFP36L1/FOXE1/PPL/ERRFI1/ZBED2/LSR/ITGA2/SCEL/LRP4/ST14/CD109/FLNB/TXNIP/ZFP36/BCL2/STMN1	21
GO:0032103	BP	GO:0032103	positive regulation of response to external stimulus	29/593	427/18723	0.000104187	0.00267418	0.00201314	MDK/DAPK2/MET/VEGFA/NUPR1/LRRK2/CALR/ITGA2/MAPK13/SASH1/NINJ1/RARRES2/IL16/SH2D1A/LY86/PYHIN1/PYCARD/SPI1/NFKBIA/MNDA/TMSB4X/ALOX5AP/CCL5/TYROBP/CCL4/GAS6/LGALS9/TGFB1/CXCL8	29
GO:0001906	BP	GO:0001906	cell killing	17/593	188/18723	0.000104669	0.00267418	0.00201314	CTSH/CD55/PRDX1/CFH/EMP2/RAB27A/SH2D1A/SERPINB9/SPI1/GZMM/PRF1/HLA-B/IL7R/PTPRC/TYROBP/GNLY/LGALS9	17
GO:0072073	BP	GO:0072073	kidney epithelium development	14/593	136/18723	0.000107115	0.00272189	0.00204906	CD24/TACSTD2/SDC4/PAX8/VEGFA/CITED1/BMP7/EPHA4/ARG2/BASP1/SDC1/SPRY1/MEF2C/BCL2	14
GO:0045860	BP	GO:0045860	positive regulation of protein kinase activity	27/593	386/18723	0.000110338	0.00278871	0.00209936	CLU/CD24/SDC4/CCND1/TPD52L1/VEGFA/CHI3L1/LRRK2/EMP2/EGR1/FAM20A/AFAP1L2/EPHA4/HMGA2/TENM1/STRADB/CCND2/SASH1/NAB2/AREG/PTPRC/CCL5/GAS6/TGFB1/CDKN1A/CCND3/DDX3X	27
GO:0060606	BP	GO:0060606	tube closure	11/593	89/18723	0.000114226	0.00286941	0.00216011	SDC4/SPINT1/PLXNB2/FOLR1/LRP2/PRICKLE1/ST14/HECTD1/VASP/TGFB1/PRKACB	11
GO:0030522	BP	GO:0030522	intracellular receptor signaling pathway	21/593	265/18723	0.000115057	0.00286941	0.00216011	LMO3/DHRS3/DCBLD2/CALR/SREBF1/DDX17/HMGA2/NR2F6/ARNTL/RXRG/PIM1/NR4A2/NFKBIA/KLF2/TNFAIP3/DAB2/FABP5/NR3C1/RORA/CYLD/NR4A1	21
GO:0008360	BP	GO:0008360	regulation of cell shape	15/593	154/18723	0.000115362	0.00286941	0.00216011	FN1/VEGFA/ANXA1/MYH10/PLXNB2/EPS8/RHOBTB3/RHOU/HPN/SH3KBP1/RHOH/LST1/SEMA4D/SLC9A3R1/MSN	15
GO:0031668	BP	GO:0031668	cellular response to extracellular stimulus	20/593	246/18723	0.000117551	0.00290845	0.00218951	LCN2/DAPL1/LRRK2/HSPA5/FOLR1/SREBF1/XPR1/INHBB/PIM1/NR4A2/PTPRC/GAS6/ATF3/BCL2/CDKN1A/ATP2B1/PMAIP1/GABARAPL1/SLC38A2/FOS	20
GO:2001238	BP	GO:2001238	positive regulation of extrinsic apoptotic signaling pathway	8/593	48/18723	0.000119107	0.00293153	0.00220687	CAV1/TNFRSF12A/PYCARD/PTPRC/ATF3/TNFSF10/PMAIP1/CYLD	8
GO:0071384	BP	GO:0071384	cellular response to corticosteroid stimulus	9/593	61/18723	0.000120404	0.00294801	0.00221928	ANXA1/ZFP36L1/ERRFI1/ZFP36L2/ZFP36/NR3C1/DDIT4/KLF9/ATP2B1	9
GO:0002407	BP	GO:0002407	dendritic cell chemotaxis	6/593	26/18723	0.000131865	0.00319534	0.00240547	CALR/SPI1/GPR183/CCL5/GAS6/LGALS9	6
GO:0042278	BP	GO:0042278	purine nucleoside metabolic process	6/593	26/18723	0.000131865	0.00319534	0.00240547	MACROD2/NT5E/ADK/NT5C2/PNP/AMD1	6
GO:0002260	BP	GO:0002260	lymphocyte homeostasis	9/593	62/18723	0.000136951	0.00330158	0.00248546	SIT1/TNFSF13B/MEF2C/TNFAIP3/TSC22D3/LGALS9/BCL2/PMAIP1/BAX	9
GO:0001913	BP	GO:0001913	T cell mediated cytotoxicity	8/593	49/18723	0.000138447	0.0033206	0.00249977	CTSH/EMP2/RAB27A/GZMM/PRF1/HLA-B/IL7R/PTPRC	8
GO:0001657	BP	GO:0001657	ureteric bud development	11/593	91/18723	0.000139827	0.00333668	0.00251188	TACSTD2/SDC4/PAX8/VEGFA/CITED1/BMP7/ARG2/BASP1/SDC1/SPRY1/BCL2	11
GO:0061450	BP	GO:0061450	trophoblast cell migration	5/593	17/18723	0.000141305	0.00335486	0.00252557	VEGFA/TIMP1/GJA1/CALR/ARHGDIB	5
GO:0022604	BP	GO:0022604	regulation of cell morphogenesis	23/593	309/18723	0.000142016	0.00335486	0.00252557	FN1/TACSTD2/MDK/VEGFA/ANXA1/MYH10/PLXNB2/CALR/EPS8/RHOBTB3/RHOU/HPN/EPHA4/MYO9A/SPARC/SH3KBP1/RHOH/LST1/SEMA4D/MYADM/SLC9A3R1/CD44/MSN	23
GO:0051250	BP	GO:0051250	negative regulation of lymphocyte activation	15/593	157/18723	0.00014323	0.00336662	0.00253442	SDC4/MDK/LGALS3/ANXA1/ARG2/RUNX3/TBC1D10C/FGL2/TIGIT/MNDA/LST1/TNFAIP3/TYROBP/LGALS9/ATM	15
GO:0052126	BP	GO:0052126	movement in host environment	16/593	175/18723	0.000145808	0.00341017	0.0025672	CAV1/CTSB/CLDN1/CD55/DPP4/SLC20A2/ITGA2/XPR1/SELPLG/TNFRSF4/GAS6/LGALS9/LGALS1/TRIM22/IFITM3/CXCL8	16
GO:0045862	BP	GO:0045862	positive regulation of proteolysis	26/593	372/18723	0.000148995	0.00346745	0.00261032	CLU/FN1/CAV1/PERP/CTSH/APOE/NUPR1/LRRK2/MTCH1/HPN/EPHA4/PRICKLE1/RPS27L/HECTD1/PYHIN1/PYCARD/TNFRSF1B/DAB2/ASPH/LGALS9/TNFSF10/CYCS/DDX3X/PMAIP1/HERPUD1/BAX	26
GO:0002285	BP	GO:0002285	lymphocyte activation involved in immune response	17/593	194/18723	0.000153522	0.00353969	0.00266471	MDK/LGALS3/TMEM98/ANXA1/RAB27A/IRF8/SPI1/FGL2/ITM2A/GPR183/PTPRC/FCER1G/ITGAL/LGALS9/TGFB1/LGALS1/RORA	17
GO:0072163	BP	GO:0072163	mesonephric epithelium development	11/593	92/18723	0.000154358	0.00353969	0.00266471	TACSTD2/SDC4/PAX8/VEGFA/CITED1/BMP7/ARG2/BASP1/SDC1/SPRY1/BCL2	11
GO:0072164	BP	GO:0072164	mesonephric tubule development	11/593	92/18723	0.000154358	0.00353969	0.00266471	TACSTD2/SDC4/PAX8/VEGFA/CITED1/BMP7/ARG2/BASP1/SDC1/SPRY1/BCL2	11
GO:0010038	BP	GO:0010038	response to metal ion	26/593	373/18723	0.000155503	0.00354861	0.00267142	CAV1/LCN2/CCND1/SORD/CLDN1/LRRK2/HSPA5/S100A16/PAM/CALR/CYBRD1/SLC25A23/ANK3/SDC1/SPARC/TXNIP/JUNB/MEF2C/C1QA/ALOX5AP/BCL2/MT1F/DUSP1/MT1X/FOSB/FOS	26
GO:0032355	BP	GO:0032355	response to estradiol	14/593	141/18723	0.000157651	0.00354861	0.00267142	CRYAB/CCND1/ANXA1/GPX4/PAM/GJA1/CALR/BMP7/ITGA2/NRIP1/TXNIP/AREG/TGFB1/DUSP1	14
GO:0034341	BP	GO:0034341	response to interferon-gamma	14/593	141/18723	0.000157651	0.00354861	0.00267142	CLDN1/CITED1/PARP14/FLNB/IRF8/CCL3L3/CCL5/CCL4/LGALS9/SYNCRIP/GBP3/GBP2/CD58/IFITM3	14
GO:0060485	BP	GO:0060485	mesenchyme development	22/593	291/18723	0.000157766	0.00354861	0.00267142	FN1/MDK/ZFP36L1/FOLR1/NRP2/BMP7/HPN/DDX17/HMGA2/BASP1/EPB41L5/VASN/SPRY1/GLIPR2/ANXA6/SDCBP/MEF2C/DAB2/SEMA4D/TGFB1/BCL2/S100A4	22
GO:0007160	BP	GO:0007160	cell-matrix adhesion	19/593	233/18723	0.000166105	0.00371838	0.00279922	FN1/SDC4/VEGFA/CD63/ITGA3/BCAM/EMP2/CCL28/RRAS/LIMCH1/ITGA2/ADAMTS9/EPB41L5/CD96/CD3E/ITGAL/PLAU/BCL2/CD44	19
GO:0032970	BP	GO:0032970	regulation of actin filament-based process	27/593	397/18723	0.00017483	0.00389515	0.0029323	TACSTD2/CAV1/SDC4/MDK/MET/ID1/DSTN/KCNJ2/ATP1A1/PAM/EPS8/RHOBTB3/LIMCH1/TENM1/ABI3/TMSB10/PYCARD/PDE4B/RHOH/TMSB4X/ARHGDIB/VASP/DSC2/MYADM/BIN1/IQGAP2/STMN1	27
GO:0007178	BP	GO:0007178	transmembrane receptor protein serine/threonine kinase signaling pathway	25/593	355/18723	0.000176785	0.00392013	0.0029511	CAV1/IGSF1/ID1/CITED1/GDF15/HSPA5/ITGA3/FOLR1/LRP2/BMP7/EGR1/LTBP2/INHBB/LTBP4/GIPC1/VASN/CD109/SNX25/SPRY1/FBN1/SPI1/SDCBP/DAB2/TGFB1/FOS	25
GO:0002291	BP	GO:0002291	T cell activation via T cell receptor contact with antigen bound to MHC molecule on antigen presenting cell	4/593	10/18723	0.000179645	0.00394631	0.00297081	LGALS3/FGL2/ITGAL/LGALS9	4
GO:2000510	BP	GO:2000510	positive regulation of dendritic cell chemotaxis	4/593	10/18723	0.000179645	0.00394631	0.00297081	CALR/SPI1/GAS6/LGALS9	4
GO:0002690	BP	GO:0002690	positive regulation of leukocyte chemotaxis	11/593	94/18723	0.000187295	0.00409524	0.00308292	MDK/DAPK2/VEGFA/CALR/RARRES2/SPI1/CCL5/CCL4/GAS6/LGALS9/CXCL8	11
GO:0002768	BP	GO:0002768	immune response-regulating cell surface receptor signaling pathway	23/593	315/18723	0.000188328	0.00409874	0.00308556	CD24/LGALS3/SLC39A10/MAP3K1/ITK/SH2D1A/TRAT1/PDE4B/CD247/MEF2C/MNDA/HLA-DQB1/TRBC1/CD3E/IGHG4/TRBC2/PTPRC/FCER1G/TYROBP/CMTM3/IGHG1/BCL2/BAX	23
GO:0002698	BP	GO:0002698	negative regulation of immune effector process	12/593	110/18723	0.000189964	0.00411531	0.00309803	LGALS3/ANXA1/CD55/SERPINB9/CD96/SPI1/FGL2/HLA-B/IL7R/PTPRC/LGALS9/TGFB1	12
GO:0002366	BP	GO:0002366	leukocyte activation involved in immune response	21/593	275/18723	0.000192533	0.00415182	0.00312552	S100A13/MDK/LGALS3/TMEM98/ANXA1/ANXA3/RAB27A/IRF8/PYCARD/SPI1/FGL2/ITM2A/GPR183/PTPRC/FCER1G/TYROBP/ITGAL/LGALS9/TGFB1/LGALS1/RORA	21
GO:1902742	BP	GO:1902742	apoptotic process involved in development	7/593	39/18723	0.000196474	0.00421746	0.00317494	PAX8/CRYAB/BMP7/SLIT3/SPI1/TNFRSF1B/BAX	7
GO:0030048	BP	GO:0030048	actin filament-based movement	13/593	127/18723	0.000198025	0.00421998	0.00317683	CAV1/MYH10/KCNJ2/ATP1A1/EMP2/MYO6/GJA1/LIMCH1/SYNE2/EPB41L5/PDE4B/DSC2/BIN1	13
GO:0071677	BP	GO:0071677	positive regulation of mononuclear cell migration	9/593	65/18723	0.000198387	0.00421998	0.00317683	LGALS3/CALR/DOCK8/PYCARD/SPI1/CCL5/CCL4/GAS6/LGALS9	9
GO:0090092	BP	GO:0090092	regulation of transmembrane receptor protein serine/threonine kinase signaling pathway	20/593	256/18723	0.000200877	0.0042537	0.00320222	CAV1/IGSF1/CITED1/GDF15/HSPA5/ITGA3/FOLR1/LRP2/BMP7/INHBB/LTBP4/GIPC1/VASN/CD109/SNX25/SPRY1/FBN1/SDCBP/DAB2/TGFB1	20
GO:0016055	BP	GO:0016055	Wnt signaling pathway	29/593	444/18723	0.000203126	0.00428205	0.00322356	CD24/CAV1/MDK/CCND1/SOX4/IGFBP6/APOE/CITED1/LRRK2/ITGA3/FOLR1/EGR1/PRICKLE1/SCEL/RBMS3/LRP4/SDC1/ARNTL/VGLL4/TNIK/NR4A2/TNFAIP3/DAB2/TGFB1/SLC9A3R1/TLE4/DDX3X/KLF4/CYLD	29
GO:0006959	BP	GO:0006959	humoral immune response	23/593	317/18723	0.000206493	0.00433359	0.00326236	CLU/SLPI/CXCL14/CD55/CFH/CFI/RARRES2/SH2D1A/MEF2C/HLA-DQB1/TRBC1/GPR183/C1QC/C1QB/C1QA/IGHG4/TRBC2/PTPRC/GNLY/IGHG1/BCL2/CFD/CXCL8	23
GO:0001570	BP	GO:0001570	vasculogenesis	10/593	80/18723	0.000211119	0.00437614	0.00329439	CAV1/NTRK2/VEGFA/CITED1/EMP2/ZFP36L1/RRAS/TIPARP/JUNB/TGFB1	10
GO:0009791	BP	GO:0009791	post-embryonic development	10/593	80/18723	0.000211119	0.00437614	0.00329439	VEGFA/IGF2R/TIPARP/FBN1/NR4A2/CSRNP1/BCL2/KLF4/BAX/PRDM1	10
GO:0001819	BP	GO:0001819	positive regulation of cytokine production	30/593	467/18723	0.000211313	0.00437614	0.00329439	CLU/S100A13/MDK/CHI3L1/ANXA1/LRRK2/CD55/EGR1/AFAP1L2/MAPK13/AGPAT2/ITK/IL16/PYHIN1/IRF8/PYCARD/PDE4B/TIGIT/MNDA/CD3E/CD2/PTPRC/FCER1G/TYROBP/LGALS9/TGFB1/PNP/CD58/DDX3X/RORA	30
GO:0032612	BP	GO:0032612	interleukin-1 production	13/593	128/18723	0.000214167	0.0043965	0.00330972	S100A13/ANXA1/ERRFI1/EGR1/ARG2/IL16/PYHIN1/PYCARD/MNDA/TNFAIP3/TYROBP/GAS6/LGALS9	13
GO:0032652	BP	GO:0032652	regulation of interleukin-1 production	13/593	128/18723	0.000214167	0.0043965	0.00330972	S100A13/ANXA1/ERRFI1/EGR1/ARG2/IL16/PYHIN1/PYCARD/MNDA/TNFAIP3/TYROBP/GAS6/LGALS9	13
GO:0198738	BP	GO:0198738	cell-cell signaling by wnt	29/593	446/18723	0.000219059	0.00447737	0.00337059	CD24/CAV1/MDK/CCND1/SOX4/IGFBP6/APOE/CITED1/LRRK2/ITGA3/FOLR1/EGR1/PRICKLE1/SCEL/RBMS3/LRP4/SDC1/ARNTL/VGLL4/TNIK/NR4A2/TNFAIP3/DAB2/TGFB1/SLC9A3R1/TLE4/DDX3X/KLF4/CYLD	29
GO:0001823	BP	GO:0001823	mesonephros development	11/593	96/18723	0.000226004	0.00459932	0.0034624	TACSTD2/SDC4/PAX8/VEGFA/CITED1/BMP7/ARG2/BASP1/SDC1/SPRY1/BCL2	11
GO:0042542	BP	GO:0042542	response to hydrogen peroxide	14/593	146/18723	0.000227594	0.00461171	0.00347173	LCN2/CRYAB/MET/ANXA1/LRRK2/SDC1/MAPK13/TXNIP/KLF2/AREG/TNFAIP3/BCL2/DUSP1/KLF4	14
GO:0002263	BP	GO:0002263	cell activation involved in immune response	21/593	279/18723	0.000234569	0.00473266	0.00356278	S100A13/MDK/LGALS3/TMEM98/ANXA1/ANXA3/RAB27A/IRF8/PYCARD/SPI1/FGL2/ITM2A/GPR183/PTPRC/FCER1G/TYROBP/ITGAL/LGALS9/TGFB1/LGALS1/RORA	21
GO:0050851	BP	GO:0050851	antigen receptor-mediated signaling pathway	19/593	240/18723	0.00024299	0.00488161	0.00367491	LGALS3/SLC39A10/ITK/SH2D1A/TRAT1/PDE4B/CD247/MEF2C/MNDA/HLA-DQB1/TRBC1/CD3E/IGHG4/TRBC2/PTPRC/CMTM3/IGHG1/BCL2/BAX	19
GO:0051701	BP	GO:0051701	biological process involved in interaction with host	17/593	203/18723	0.000263941	0.00527993	0.00397477	CAV1/CTSB/CLDN1/CD55/DPP4/SLC20A2/ITGA2/XPR1/SELPLG/SERPINB9/TNFRSF4/GAS6/LGALS9/LGALS1/TRIM22/IFITM3/CXCL8	17
GO:0050727	BP	GO:0050727	regulation of inflammatory response	26/593	386/18723	0.000266332	0.0053052	0.0039938	MDK/APOE/NUPR1/ANXA1/LRRK2/GPX4/ITGA2/NT5E/MAPK13/DUOXA2/NINJ1/IL16/PYCARD/SOCS3/TNFRSF1B/NFKBIA/ZFP36/TNFAIP3/CST7/TMSB4X/ALOX5AP/PTPRC/CCL5/KLF4/RORA/CYLD	26
GO:0042451	BP	GO:0042451	purine nucleoside biosynthetic process	4/593	11/18723	0.000275238	0.00535118	0.00402841	NT5E/ADK/PNP/AMD1	4
GO:0042455	BP	GO:0042455	ribonucleoside biosynthetic process	4/593	11/18723	0.000275238	0.00535118	0.00402841	NT5E/ADK/PNP/AMD1	4
GO:0046129	BP	GO:0046129	purine ribonucleoside biosynthetic process	4/593	11/18723	0.000275238	0.00535118	0.00402841	NT5E/ADK/PNP/AMD1	4
GO:0098883	BP	GO:0098883	synapse pruning	4/593	11/18723	0.000275238	0.00535118	0.00402841	EPHA4/C1QC/C1QB/C1QA	4
GO:1902337	BP	GO:1902337	regulation of apoptotic process involved in morphogenesis	4/593	11/18723	0.000275238	0.00535118	0.00402841	PAX8/BMP7/TNFRSF1B/BAX	4
GO:0007369	BP	GO:0007369	gastrulation	16/593	185/18723	0.00027601	0.00535118	0.00402841	FN1/COL8A1/ITGA3/LAMB3/GJA1/DUSP5/BMP7/ITGA2/HMGA2/HSBP1/EPB41L5/DUSP2/MYADM/DUSP4/DUSP1/KLF4	16
GO:0002274	BP	GO:0002274	myeloid leukocyte activation	18/593	223/18723	0.00027721	0.00535118	0.00402841	CLU/S100A13/LRRK2/ANXA3/DCSTAMP/PYCARD/SPI1/RHOH/CST7/CD2/C1QA/PTPRC/FCER1G/CCL5/TYROBP/LGALS9/RORA/CXCL8	18
GO:0006968	BP	GO:0006968	cellular defense response	8/593	54/18723	0.000278032	0.00535118	0.00402841	ITK/SH2D1A/TRAT1/PRF1/MNDA/LSP1/TYROBP/GNLY	8
GO:0060070	BP	GO:0060070	canonical Wnt signaling pathway	22/593	303/18723	0.000278885	0.00535118	0.00402841	CAV1/MDK/SOX4/IGFBP6/APOE/LRRK2/FOLR1/EGR1/PRICKLE1/SCEL/RBMS3/LRP4/SDC1/ARNTL/NR4A2/DAB2/TGFB1/SLC9A3R1/TLE4/DDX3X/KLF4/CYLD	22
GO:0051592	BP	GO:0051592	response to calcium ion	14/593	149/18723	0.000281234	0.00537431	0.00404582	CAV1/CCND1/HSPA5/S100A16/SLC25A23/SDC1/SPARC/TXNIP/JUNB/MEF2C/ALOX5AP/DUSP1/FOSB/FOS	14
GO:0031341	BP	GO:0031341	regulation of cell killing	11/593	99/18723	0.000296625	0.00564549	0.00424996	CD55/CFH/SH2D1A/SERPINB9/SPI1/PRF1/HLA-B/IL7R/PTPRC/TYROBP/LGALS9	11
GO:0031571	BP	GO:0031571	mitotic G1 DNA damage checkpoint signaling	6/593	30/18723	0.000305373	0.00578853	0.00435765	CCND1/SOX4/MUC1/RPS27L/CDKN1A/ATM	6
GO:0016485	BP	GO:0016485	protein processing	18/593	225/18723	0.000309089	0.00583545	0.00439297	PERP/CTSH/TMEM98/LRRK2/PCSK1N/PCSK2/CLN5/ECE1/HPN/SCG5/PYCARD/CST7/ASPH/SEC11C/PLAU/PGK1/PRKACB/CTSS	18
GO:0006970	BP	GO:0006970	response to osmotic stress	10/593	84/18723	0.000316212	0.00594604	0.00447623	SORD/CLDN1/ZFP36L1/ERRFI1/ITGA2/SLC25A23/MAPK13/TSC22D3/DDX3X/BAX	10
GO:2001236	BP	GO:2001236	regulation of extrinsic apoptotic signaling pathway	14/593	151/18723	0.000322732	0.00604447	0.00455032	CAV1/LGALS3/TNFRSF12A/STRADB/ZMYND11/PYCARD/TNFAIP3/PTPRC/ATF3/TNFSF10/BCL2/DDX3X/PMAIP1/CYLD	14
GO:0030111	BP	GO:0030111	regulation of Wnt signaling pathway	23/593	328/18723	0.000336846	0.00628378	0.00473047	CAV1/MDK/SOX4/IGFBP6/APOE/CITED1/LRRK2/ITGA3/FOLR1/EGR1/PRICKLE1/SCEL/RBMS3/LRP4/ARNTL/VGLL4/TNFAIP3/DAB2/TGFB1/SLC9A3R1/TLE4/DDX3X/CYLD	23
GO:0010332	BP	GO:0010332	response to gamma radiation	8/593	56/18723	0.000359117	0.00667276	0.0050233	CRYAB/HSPA5/EGR1/PTPRC/BCL2/CDKN1A/ATM/BAX	8
GO:0016049	BP	GO:0016049	cell growth	30/593	482/18723	0.000360885	0.00667921	0.00502816	FN1/CRYAB/APOE/VEGFA/CHPT1/FLRT3/DCBLD2/DCSTAMP/GJA1/SORBS2/NRP2/CRABP2/HPN/GOLGA4/LTBP4/MAP2/EPB41L5/NRCAM/SPOCK1/SLIT3/RAPH1/VGLL4/SDCBP/SGK1/RGS2/SEMA4D/TGFB1/BCL2/CDKN1A/DDX3X	30
GO:0022612	BP	GO:0022612	gland morphogenesis	12/593	118/18723	0.000366595	0.00673189	0.00506781	CAV1/MDK/ELF3/BMP7/HPN/AREG/TNFAIP3/TGFB1/SLC9A3R1/BCL2/BAX/MSN	12
GO:0071346	BP	GO:0071346	cellular response to interferon-gamma	12/593	118/18723	0.000366595	0.00673189	0.00506781	CLDN1/PARP14/FLNB/IRF8/CCL3L3/CCL5/CCL4/LGALS9/SYNCRIP/GBP3/GBP2/CD58	12
GO:0044819	BP	GO:0044819	mitotic G1/S transition checkpoint signaling	6/593	31/18723	0.000368621	0.00674275	0.00507599	CCND1/SOX4/MUC1/RPS27L/CDKN1A/ATM	6
GO:0051216	BP	GO:0051216	cartilage development	16/593	190/18723	0.000372484	0.006787	0.0051093	MDK/CHI3L1/TIMP1/BMP7/ECM1/HMGA2/POR/CREB3L2/MBOAT2/ANXA6/RUNX3/MEF2C/TGFBI/TGFB1/MGP/CD44	16
GO:0071107	BP	GO:0071107	response to parathyroid hormone	4/593	12/18723	0.00040254	0.00725035	0.00545812	CITED1/GJA1/ITGA2/MEF2C	4
GO:1904748	BP	GO:1904748	regulation of apoptotic process involved in development	4/593	12/18723	0.00040254	0.00725035	0.00545812	PAX8/BMP7/TNFRSF1B/BAX	4
GO:2000508	BP	GO:2000508	regulation of dendritic cell chemotaxis	4/593	12/18723	0.00040254	0.00725035	0.00545812	CALR/SPI1/GAS6/LGALS9	4
GO:0002429	BP	GO:0002429	immune response-activating cell surface receptor signaling pathway	21/593	291/18723	0.000412843	0.00737938	0.00555525	LGALS3/SLC39A10/ITK/SH2D1A/TRAT1/PDE4B/CD247/MEF2C/MNDA/HLA-DQB1/TRBC1/CD3E/IGHG4/TRBC2/PTPRC/FCER1G/TYROBP/CMTM3/IGHG1/BCL2/BAX	21
GO:0002757	BP	GO:0002757	immune response-activating signal transduction	21/593	291/18723	0.000412843	0.00737938	0.00555525	LGALS3/SLC39A10/ITK/SH2D1A/TRAT1/PDE4B/CD247/MEF2C/MNDA/HLA-DQB1/TRBC1/CD3E/IGHG4/TRBC2/PTPRC/FCER1G/TYROBP/CMTM3/IGHG1/BCL2/BAX	21
GO:0006986	BP	GO:0006986	response to unfolded protein	13/593	137/18723	0.000417587	0.00742142	0.0055869	CCND1/AGR2/HSPA5/CREB3L2/DNAJC3/RHBDD2/MANF/DNAJB4/ATF3/PPP1R15A/HERPUD1/BAX/DNAJB1	13
GO:0046128	BP	GO:0046128	purine ribonucleoside metabolic process	5/593	21/18723	0.000418353	0.00742142	0.0055869	NT5E/ADK/NT5C2/PNP/AMD1	5
GO:1903364	BP	GO:1903364	positive regulation of cellular protein catabolic process	14/593	155/18723	0.000421644	0.00745169	0.00560969	CLU/CAV1/APOE/NUPR1/LRRK2/LRP2/PRICKLE1/HECTD1/VGLL4/PYHIN1/TNFAIP3/DAB2/HERPUD1/MSN	14
GO:0060711	BP	GO:0060711	labyrinthine layer development	7/593	44/18723	0.000426921	0.00751668	0.00565862	CITED1/SPINT1/ZFP36L1/BMP7/ST14/SOCS3/JUNB	7
GO:0046631	BP	GO:0046631	alpha-beta T cell activation	14/593	156/18723	0.000450067	0.00789465	0.00594315	TMEM98/ANXA1/CD55/ARG2/ITK/RUNX3/CD3E/GPR183/PTPRC/LGALS9/BCL2/PNP/RORA/PRDM1	14
GO:0045621	BP	GO:0045621	positive regulation of lymphocyte differentiation	11/593	104/18723	0.000455392	0.00795836	0.00599111	MDK/SOX4/ANXA1/RUNX3/CD27/RHOH/IL7R/PTPRC/GAS6/LGALS9/PNP	11
GO:0010232	BP	GO:0010232	vascular transport	10/593	88/18723	0.00046178	0.0080401	0.00605265	APOE/GJA1/LRP2/ATP8A1/SLC7A2/ABCC3/FABP5/SLC9A3R1/SLC38A1/SLC38A2	10
GO:0033674	BP	GO:0033674	positive regulation of kinase activity	29/593	467/18723	0.000466839	0.00806842	0.00607396	CLU/CD24/SDC4/CCND1/NTRK2/TPD52L1/MET/VEGFA/CHI3L1/LRRK2/EMP2/EGR1/FAM20A/AFAP1L2/EPHA4/HMGA2/TENM1/STRADB/CCND2/SASH1/NAB2/AREG/PTPRC/CCL5/GAS6/TGFB1/CDKN1A/CCND3/DDX3X	29
GO:0061564	BP	GO:0061564	axon development	29/593	467/18723	0.000466839	0.00806842	0.00607396	FN1/S100A6/NTRK2/APOE/VEGFA/FLRT3/PTPRF/PLXNB2/FOLR1/NRP2/CRABP2/BMP7/EPHA4/GOLGA4/MAP2/LRP4/ANK3/NRCAM/ETV1/SLIT3/RAPH1/TCTN1/RHOH/NR4A2/SEMA4D/VASP/BCL2/KLF4/STMN1	29
GO:0060828	BP	GO:0060828	regulation of canonical Wnt signaling pathway	19/593	253/18723	0.000470713	0.00810558	0.00610194	CAV1/MDK/SOX4/IGFBP6/APOE/LRRK2/FOLR1/EGR1/PRICKLE1/SCEL/RBMS3/LRP4/ARNTL/DAB2/TGFB1/SLC9A3R1/TLE4/DDX3X/CYLD	19
GO:0051651	BP	GO:0051651	maintenance of location in cell	17/593	214/18723	0.000487564	0.0083651	0.00629731	CAV1/LCN2/HSP90B1/APOE/HSPA5/GJA1/CALR/SLC25A23/ANK3/DMD/KDELR3/TMSB10/ANXA6/TMSB4X/PTPRC/SYNE1/BAX	17
GO:0006979	BP	GO:0006979	response to oxidative stress	28/593	446/18723	0.000490012	0.00837653	0.00630591	GPX3/LCN2/PDLIM1/CRYAB/MET/APOE/ANXA1/LRRK2/GPX4/TPO/PRDX1/PON2/BMP7/SDC1/MSRB2/ARNTL/MAPK13/TXNIP/NR4A2/KLF2/AREG/TNFAIP3/BCL2/DUSP1/KLF4/TRA2B/HNRNPM/FOS	28
GO:0071900	BP	GO:0071900	regulation of protein serine/threonine kinase activity	24/593	359/18723	0.000504306	0.00858965	0.00646635	CD24/CAV1/CCND1/TPD52L1/APOE/VEGFA/LRRK2/BMP7/FAM20A/EPHA4/HMGA2/TENM1/CCND2/SASH1/SPRY1/PYCARD/RGS2/TNFAIP3/TGFB1/CDKN1A/CCND3/DUSP1/DDX3X/CCNL1	24
GO:0050678	BP	GO:0050678	regulation of epithelial cell proliferation	25/593	381/18723	0.000511167	0.00867508	0.00653066	CAV1/MDK/CCND1/CLDN1/APOE/ID1/VEGFA/NUPR1/ZFP36L1/GJA1/NRP2/ERRFI1/ECM1/HPN/CD109/SPARC/RUNX3/AREG/MEF2C/ZFP36/TNFAIP3/TGFB1/KLF9/BAX/NR4A1	25
GO:0031669	BP	GO:0031669	cellular response to nutrient levels	17/593	215/18723	0.000514268	0.00869306	0.0065442	LCN2/DAPL1/LRRK2/HSPA5/FOLR1/SREBF1/XPR1/INHBB/PIM1/GAS6/ATF3/BCL2/CDKN1A/ATP2B1/PMAIP1/GABARAPL1/SLC38A2	17
GO:0001836	BP	GO:0001836	release of cytochrome c from mitochondria	8/593	59/18723	0.000515925	0.00869306	0.0065442	CLU/GGCT/PYCARD/TNFSF10/BCL2/PLAUR/PMAIP1/BAX	8
GO:0001763	BP	GO:0001763	morphogenesis of a branching structure	16/593	196/18723	0.000525423	0.00876074	0.00659515	TACSTD2/MDK/PAX8/MET/CTSH/VEGFA/CITED1/LRRK2/SPINT1/BMP7/ST14/SPRY1/SOCS3/AREG/BCL2/PRDM1	16
GO:0010165	BP	GO:0010165	response to X-ray	6/593	33/18723	0.000525516	0.00876074	0.00659515	CCND1/ANXA1/HMGA2/CCND2/CDKN1A/ATM	6
GO:0051412	BP	GO:0051412	response to corticosterone	5/593	22/18723	0.000527396	0.00876074	0.00659515	CCND1/CDKN1A/ATP2B1/FOSB/FOS	5
GO:0060713	BP	GO:0060713	labyrinthine layer morphogenesis	5/593	22/18723	0.000527396	0.00876074	0.00659515	SPINT1/ZFP36L1/BMP7/ST14/SOCS3	5
GO:0030968	BP	GO:0030968	endoplasmic reticulum unfolded protein response	9/593	74/18723	0.000533168	0.00882543	0.00664385	CCND1/AGR2/HSPA5/CREB3L2/RHBDD2/ATF3/PPP1R15A/HERPUD1/BAX	9
GO:0002062	BP	GO:0002062	chondrocyte differentiation	11/593	106/18723	0.00053627	0.00884564	0.00665906	MDK/ECM1/HMGA2/POR/CREB3L2/MBOAT2/ANXA6/RUNX3/MEF2C/TGFBI/TGFB1	11
GO:0009612	BP	GO:0009612	response to mechanical stimulus	17/593	216/18723	0.000542222	0.00891253	0.00670942	MDK/CHI3L1/KCNJ2/ATP1A1/GJA1/PPL/MAP3K1/ITGA2/HPN/SCEL/DMD/ETV1/TXNIP/NFKBIA/SLC38A2/FOSB/FOS	17
GO:0035966	BP	GO:0035966	response to topologically incorrect protein	14/593	159/18723	0.000545335	0.00893247	0.00672443	CLU/CCND1/AGR2/HSPA5/CREB3L2/DNAJC3/RHBDD2/MANF/DNAJB4/ATF3/PPP1R15A/HERPUD1/BAX/DNAJB1	14
GO:0061097	BP	GO:0061097	regulation of protein tyrosine kinase activity	10/593	90/18723	0.000553186	0.00902962	0.00679756	CD24/CAV1/ERRFI1/AFAP1L2/EPHA4/AREG/PTPRC/CCL5/GAS6/SH3BP5	10
GO:0032352	BP	GO:0032352	positive regulation of hormone metabolic process	4/593	13/18723	0.000566934	0.00915861	0.00689467	PAX8/EGR1/HPN/POR	4
GO:0034112	BP	GO:0034112	positive regulation of homotypic cell-cell adhesion	4/593	13/18723	0.000566934	0.00915861	0.00689467	ANK3/CCL5/LGALS1/PLAUR	4
GO:0070486	BP	GO:0070486	leukocyte aggregation	4/593	13/18723	0.000566934	0.00915861	0.00689467	BMP7/SEMA4D/CD44/MSN	4
GO:0031663	BP	GO:0031663	lipopolysaccharide-mediated signaling pathway	8/593	60/18723	0.000579058	0.00932243	0.00701799	CD55/SASH1/LY86/SPI1/NFKBIA/TNFAIP3/CCL5/TGFB1	8
GO:2000045	BP	GO:2000045	regulation of G1/S transition of mitotic cell cycle	13/593	142/18723	0.000589035	0.00943673	0.00710404	CCND1/SOX4/MUC1/ANXA1/TMEM14B/RPS27L/CCND2/BCL2/CDKN1A/ATM/CCND3/DDX3X/KLF4	13
GO:0051098	BP	GO:0051098	regulation of binding	24/593	363/18723	0.000590172	0.00943673	0.00710404	SLPI/CAV1/MET/APOE/ID1/LRRK2/PHLDA2/PTPRF/CLN5/ITGA2/EPHA4/HMGA2/MAP2/EPB41L5/PYHIN1/NFKBIA/TMSB4X/DAB2/TGFB1/CDKN1A/PLAUR/KLF4/BAX/STMN1	24
GO:0045582	BP	GO:0045582	positive regulation of T cell differentiation	10/593	91/18723	0.000604218	0.00962858	0.00724847	MDK/SOX4/ANXA1/RUNX3/CD27/RHOH/IL7R/PTPRC/LGALS9/PNP	10
GO:0071621	BP	GO:0071621	granulocyte chemotaxis	12/593	125/18723	0.000619869	0.00980012	0.0073776	MDK/LGALS3/DAPK2/ANXA1/DPP4/RARRES2/PDE4B/CCL3L3/FCER1G/CCL5/CCL4/CXCL8	12
GO:0001662	BP	GO:0001662	behavioral fear response	6/593	34/18723	0.000621237	0.00980012	0.0073776	MDK/APOE/DPP4/GJA1/MEF2C/BCL2	6
GO:0086004	BP	GO:0086004	regulation of cardiac muscle cell contraction	6/593	34/18723	0.000621237	0.00980012	0.0073776	CAV1/KCNJ2/ATP1A1/PDE4B/DSC2/BIN1	6
GO:0036293	BP	GO:0036293	response to decreased oxygen levels	22/593	322/18723	0.00063825	0.0100348	0.00755429	CD24/CAV1/LCN2/PDLIM1/CRYAB/HSP90B1/VEGFA/DPP4/PAM/ZFP36L1/BMP7/EGR1/ITGA2/VASN/NR4A2/PLAU/PGK1/DDIT4/EIF4EBP1/BCL2/RORA/PMAIP1	22
GO:0043618	BP	GO:0043618	regulation of transcription from RNA polymerase II promoter in response to stress	7/593	47/18723	0.000645557	0.0101159	0.00761531	MUC1/VEGFA/HSPA5/EGR1/KLF2/ATF3/DNAJB1	7
GO:0006929	BP	GO:0006929	substrate-dependent cell migration	5/593	23/18723	0.000656481	0.0102529	0.00771845	FN1/ITGA2/EPB41L5/SDCBP/PTPRC	5
GO:0002064	BP	GO:0002064	epithelial cell development	17/593	220/18723	0.000667498	0.0103561	0.00779618	MET/CLDN1/VEGFA/GSTM3/HSD17B4/ST14/EPB41L5/SDC1/MARVELD2/ARNTL/FLNB/MYADM/SLC9A3R1/CDKN1A/RILPL2/PRDM1/MSN	17
GO:0097529	BP	GO:0097529	myeloid leukocyte migration	17/593	220/18723	0.000667498	0.0103561	0.00779618	MDK/LGALS3/DAPK2/VEGFA/ANXA1/DPP4/MTUS1/RARRES2/PDE4B/SPI1/RHOH/CCL3L3/FCER1G/CCL5/CCL4/DUSP1/CXCL8	17
GO:0001890	BP	GO:0001890	placenta development	13/593	144/18723	0.000672578	0.0104006	0.00782966	KRT19/CTSB/CITED1/SPINT1/PHLDA2/ZFP36L1/GJA1/BMP7/ST14/HECTD1/SOCS3/JUNB/PRDM1	13
GO:0002456	BP	GO:0002456	T cell mediated immunity	11/593	109/18723	0.000679837	0.0104784	0.00788822	CTSH/CD55/EMP2/RAB27A/TNFRSF1B/CD8A/GZMM/PRF1/HLA-B/IL7R/PTPRC	11
GO:0008406	BP	GO:0008406	gonad development	17/593	221/18723	0.000702437	0.0107914	0.00812382	CCND1/TESC/VEGFA/NUPR1/HSPA5/LRP2/RHOBTB3/INHBB/HSD17B4/NRIP1/BASP1/SDC1/TIPARP/SLIT3/TNFSF10/BCL2/BAX	17
GO:0051591	BP	GO:0051591	response to cAMP	10/593	93/18723	0.000717986	0.0109943	0.0082766	CITED1/HSPA5/ZFP36L1/SREBF1/SDC1/SPARC/AREG/DUSP1/FOSB/FOS	10
GO:0060135	BP	GO:0060135	maternal process involved in female pregnancy	8/593	62/18723	0.000724042	0.0110335	0.00830613	CTSB/ITGA3/PAM/GJA1/JUNB/RGS2/LGALS9/PRDM1	8
GO:0002209	BP	GO:0002209	behavioral defense response	6/593	35/18723	0.000729937	0.0110335	0.00830613	MDK/APOE/DPP4/GJA1/MEF2C/BCL2	6
GO:0010837	BP	GO:0010837	regulation of keratinocyte proliferation	6/593	35/18723	0.000729937	0.0110335	0.00830613	MDK/ZFP36L1/CD109/AREG/ZFP36/KLF9	6
GO:0032350	BP	GO:0032350	regulation of hormone metabolic process	6/593	35/18723	0.000729937	0.0110335	0.00830613	PAX8/ATP1A1/EGR1/HPN/POR/DUOXA2	6
GO:0070482	BP	GO:0070482	response to oxygen levels	23/593	347/18723	0.000735964	0.011089	0.00834788	CD24/CAV1/LCN2/PDLIM1/CRYAB/HSP90B1/VEGFA/DPP4/PAM/ZFP36L1/BMP7/EGR1/ITGA2/VASN/NR4A2/PLAU/PGK1/DDIT4/EIF4EBP1/BCL2/CDKN1A/RORA/PMAIP1	23
GO:0045580	BP	GO:0045580	regulation of T cell differentiation	13/593	146/18723	0.000765889	0.011503	0.00865955	MDK/SOX4/ANXA1/RUNX3/CD27/RHOH/FGL2/IL7R/CD2/PTPRC/LGALS9/PNP/PRDM1	13
GO:0001771	BP	GO:0001771	immunological synapse formation	4/593	14/18723	0.000773918	0.0115133	0.00866726	LGALS3/DOCK8/PRF1/MSN	4
GO:0042921	BP	GO:0042921	glucocorticoid receptor signaling pathway	4/593	14/18723	0.000773918	0.0115133	0.00866726	LMO3/CALR/ARNTL/NR3C1	4
GO:0045059	BP	GO:0045059	positive thymic T cell selection	4/593	14/18723	0.000773918	0.0115133	0.00866726	CD3G/CD3E/PTPRC/CD3D	4
GO:0032091	BP	GO:0032091	negative regulation of protein binding	10/593	94/18723	0.000781164	0.0115338	0.00868276	SLPI/CAV1/ID1/LRRK2/PTPRF/MAP2/EPB41L5/DAB2/CDKN1A/BAX	10
GO:0045185	BP	GO:0045185	maintenance of protein location	10/593	94/18723	0.000781164	0.0115338	0.00868276	CAV1/HSPA5/GJA1/ANK3/KDELR3/FBN1/TMSB10/NFKBIA/TMSB4X/SYNE1	10
GO:0051235	BP	GO:0051235	maintenance of location	22/593	327/18723	0.000782662	0.0115338	0.00868276	CAV1/LCN2/HSP90B1/APOE/HSPA5/GJA1/CALR/SREBF1/NRIP1/SLC25A23/ANK3/DMD/KDELR3/FBN1/TMSB10/MSR1/ANXA6/NFKBIA/TMSB4X/PTPRC/SYNE1/BAX	22
GO:0050730	BP	GO:0050730	regulation of peptidyl-tyrosine phosphorylation	19/593	264/18723	0.000789728	0.0116016	0.00873377	CD24/CAV1/VEGFA/ERRFI1/AFAP1L2/EPHA4/LRP4/PARP14/SOCS3/AREG/CD3E/PTPRC/CCL5/GAS6/TNFRSF18/SEMA4D/TGFB1/SH3BP5/CD44	19
GO:0002704	BP	GO:0002704	negative regulation of leukocyte mediated immunity	8/593	63/18723	0.00080676	0.0117573	0.00885097	CD55/SERPINB9/CD96/SPI1/HLA-B/IL7R/PTPRC/LGALS9	8
GO:0001911	BP	GO:0001911	negative regulation of leukocyte mediated cytotoxicity	5/593	24/18723	0.000807829	0.0117573	0.00885097	SERPINB9/HLA-B/IL7R/PTPRC/LGALS9	5
GO:0036003	BP	GO:0036003	positive regulation of transcription from RNA polymerase II promoter in response to stress	5/593	24/18723	0.000807829	0.0117573	0.00885097	MUC1/VEGFA/HSPA5/KLF2/ATF3	5
GO:0001666	BP	GO:0001666	response to hypoxia	21/593	307/18723	0.000827357	0.0120043	0.00903695	CD24/CAV1/PDLIM1/CRYAB/HSP90B1/VEGFA/DPP4/PAM/ZFP36L1/BMP7/EGR1/ITGA2/VASN/NR4A2/PLAU/PGK1/DDIT4/EIF4EBP1/BCL2/RORA/PMAIP1	21
GO:0060538	BP	GO:0060538	skeletal muscle organ development	14/593	166/18723	0.00083617	0.0120949	0.00910511	CAV1/NUPR1/EGR1/DDX17/BASP1/DMD/ARNTL/FLNB/MEF2C/ATF3/TGFB1/BCL2/NR4A1/FOS	14
GO:0042119	BP	GO:0042119	neutrophil activation	6/593	36/18723	0.00085277	0.0122775	0.00924259	ANXA3/SPI1/FCER1G/CCL5/TYROBP/CXCL8	6
GO:1901222	BP	GO:1901222	regulation of NIK/NF-kappaB signaling	11/593	112/18723	0.000854019	0.0122775	0.00924259	PRDX1/CALR/BMP7/SASH1/SPI1/CD27/NFKBIA/TMSB4X/LGALS9/DDX3X/CYLD	11
GO:0006909	BP	GO:0006909	phagocytosis	21/593	308/18723	0.000862306	0.0123588	0.00930383	MET/ANXA1/ANXA3/RAB34/CALR/ITGA2/MFGE8/RAB27A/MSR1/IRF8/PYCARD/RHOH/TRBC1/IGHG4/TRBC2/PTPRC/FCER1G/TYROBP/ITGAL/GAS6/IGHG1	21
GO:0097530	BP	GO:0097530	granulocyte migration	13/593	148/18723	0.00086985	0.0124291	0.0093567	MDK/LGALS3/DAPK2/ANXA1/DPP4/RARRES2/PDE4B/RHOH/CCL3L3/FCER1G/CCL5/CCL4/CXCL8	13
GO:0006956	BP	GO:0006956	complement activation	12/593	130/18723	0.000879448	0.0125024	0.00941188	CLU/CD55/CFH/CFI/TRBC1/C1QC/C1QB/C1QA/IGHG4/TRBC2/IGHG1/CFD	12
GO:0007409	BP	GO:0007409	axonogenesis	26/593	418/18723	0.000880299	0.0125024	0.00941188	FN1/S100A6/NTRK2/APOE/VEGFA/FLRT3/PLXNB2/NRP2/CRABP2/BMP7/EPHA4/GOLGA4/MAP2/LRP4/ANK3/NRCAM/ETV1/SLIT3/RAPH1/TCTN1/RHOH/NR4A2/SEMA4D/VASP/BCL2/STMN1	26
GO:1903034	BP	GO:1903034	regulation of response to wounding	14/593	167/18723	0.000886829	0.0125436	0.00944294	CAV1/MDK/TNFRSF12A/CLDN1/APOE/PROS1/ANXA1/PTPRF/GJA1/EPHA4/CD109/TNFAIP3/PLAU/KLF4	14
GO:0071216	BP	GO:0071216	cellular response to biotic stimulus	18/593	246/18723	0.000888541	0.0125436	0.00944294	LCN2/HSPA5/CD55/SASH1/LY86/IRF8/PYCARD/PDE4B/SPI1/TNFRSF1B/TXNIP/NFKBIA/MEF2C/ZFP36/TNFAIP3/CCL5/TGFB1/CXCL8	18
GO:0007015	BP	GO:0007015	actin filament organization	27/593	442/18723	0.000925162	0.0130215	0.00980269	TACSTD2/SDC4/PDLIM1/HSP90B1/MET/ID1/DSTN/EMP2/MYO6/SORBS2/EPS8/RHOBTB3/LIMCH1/TENM1/MSRB2/NEBL/TMSB10/PYCARD/SH3KBP1/RHOH/TMSB4X/VASP/MYADM/BIN1/BCL2/IQGAP2/STMN1	27
GO:1902806	BP	GO:1902806	regulation of cell cycle G1/S phase transition	14/593	168/18723	0.00094005	0.0131585	0.00990582	CCND1/SOX4/MUC1/ANXA1/TMEM14B/PLPP2/RPS27L/CCND2/BCL2/CDKN1A/ATM/CCND3/DDX3X/KLF4	14
GO:0050853	BP	GO:0050853	B cell receptor signaling pathway	12/593	131/18723	0.000940953	0.0131585	0.00990582	SLC39A10/ITK/MEF2C/MNDA/TRBC1/IGHG4/TRBC2/PTPRC/CMTM3/IGHG1/BCL2/BAX	12
GO:0032102	BP	GO:0032102	negative regulation of response to external stimulus	26/593	420/18723	0.000943293	0.0131585	0.00990582	MDK/APOE/PROS1/DPP4/GJA1/EPHA4/ARG2/NT5E/PARP14/CD109/SERPINB9/CD96/SOCS3/TNFRSF1B/FGL2/HLA-B/ZFP36/TNFAIP3/CST7/PTPRC/LGALS9/SEMA4D/PLAU/DUSP1/KLF4/RORA	26
GO:0045137	BP	GO:0045137	development of primary sexual characteristics	17/593	227/18723	0.00094671	0.0131671	0.0099123	CCND1/TESC/VEGFA/NUPR1/HSPA5/LRP2/RHOBTB3/INHBB/HSD17B4/NRIP1/BASP1/SDC1/TIPARP/SLIT3/TNFSF10/BCL2/BAX	17
GO:0031579	BP	GO:0031579	membrane raft organization	5/593	25/18723	0.000983734	0.0135571	0.0102059	CAV1/EMP2/CD2/PTPRC/MYADM	5
GO:0060706	BP	GO:0060706	cell differentiation involved in embryonic placenta development	5/593	25/18723	0.000983734	0.0135571	0.0102059	KRT19/ST14/HECTD1/SOCS3/PRDM1	5
GO:0002286	BP	GO:0002286	T cell activation involved in immune response	11/593	114/18723	0.000989511	0.0135571	0.0102059	MDK/LGALS3/TMEM98/ANXA1/RAB27A/FGL2/GPR183/FCER1G/ITGAL/LGALS9/RORA	11
GO:0032570	BP	GO:0032570	response to progesterone	6/593	37/18723	0.000990934	0.0135571	0.0102059	CAV1/SREBF1/TXNIP/TGFB1/FOSB/FOS	6
GO:0043029	BP	GO:0043029	T cell homeostasis	6/593	37/18723	0.000990934	0.0135571	0.0102059	SIT1/TSC22D3/LGALS9/BCL2/PMAIP1/BAX	6
GO:0003170	BP	GO:0003170	heart valve development	8/593	65/18723	0.000994937	0.0135571	0.0102059	SOX4/ADAMTS9/HECTD1/SLIT3/TNFRSF1B/MEF2C/TGFB1/PRDM1	8
GO:0032507	BP	GO:0032507	maintenance of protein location in cell	8/593	65/18723	0.000994937	0.0135571	0.0102059	CAV1/HSPA5/GJA1/ANK3/KDELR3/TMSB10/TMSB4X/SYNE1	8
GO:0070252	BP	GO:0070252	actin-mediated cell contraction	10/593	97/18723	0.000998682	0.0135688	0.0102147	CAV1/KCNJ2/ATP1A1/EMP2/GJA1/LIMCH1/EPB41L5/PDE4B/DSC2/BIN1	10
GO:0010975	BP	GO:0010975	regulation of neuron projection development	27/593	445/18723	0.00102233	0.0136656	0.0102875	FN1/MDK/NTRK2/SDC2/APOE/ID1/VEGFA/LRRK2/HSPA5/ITGA3/PTPRF/PLXNB2/CRABP2/BMP7/INPP5J/EPHA4/GOLGA4/MAP2/LRP4/CREB3L2/SPOCK1/TNIK/ABI3/RGS2/SEMA4D/LGALS1/KLF4	27
GO:0009163	BP	GO:0009163	nucleoside biosynthetic process	4/593	15/18723	0.00102906	0.0136656	0.0102875	NT5E/ADK/PNP/AMD1	4
GO:0031958	BP	GO:0031958	corticosteroid receptor signaling pathway	4/593	15/18723	0.00102906	0.0136656	0.0102875	LMO3/CALR/ARNTL/NR3C1	4
GO:0034404	BP	GO:0034404	nucleobase-containing small molecule biosynthetic process	4/593	15/18723	0.00102906	0.0136656	0.0102875	NT5E/ADK/PNP/AMD1	4
GO:0048569	BP	GO:0048569	post-embryonic animal organ development	4/593	15/18723	0.00102906	0.0136656	0.0102875	VEGFA/FBN1/KLF4/BAX	4
GO:0098760	BP	GO:0098760	response to interleukin-7	4/593	15/18723	0.00102906	0.0136656	0.0102875	GIPC1/RAD23B/LSP1/IL7R	4
GO:0098761	BP	GO:0098761	cellular response to interleukin-7	4/593	15/18723	0.00102906	0.0136656	0.0102875	GIPC1/RAD23B/LSP1/IL7R	4
GO:1904424	BP	GO:1904424	regulation of GTP binding	4/593	15/18723	0.00102906	0.0136656	0.0102875	MET/CLN5/EPHA4/STMN1	4
GO:0071222	BP	GO:0071222	cellular response to lipopolysaccharide	16/593	209/18723	0.00104907	0.0138921	0.0104581	LCN2/CD55/SASH1/LY86/IRF8/PYCARD/PDE4B/SPI1/TNFRSF1B/NFKBIA/MEF2C/ZFP36/TNFAIP3/CCL5/TGFB1/CXCL8	16
GO:0030178	BP	GO:0030178	negative regulation of Wnt signaling pathway	14/593	170/18723	0.00105459	0.0139259	0.0104835	CAV1/MDK/IGFBP6/APOE/CITED1/EGR1/PRICKLE1/RBMS3/LRP4/VGLL4/DAB2/SLC9A3R1/TLE4/CYLD	14
GO:0050878	BP	GO:0050878	regulation of body fluid levels	24/593	379/18723	0.0010741	0.0141127	0.0106241	FN1/CAV1/SERPINA1/CCND1/AGR2/MET/CLDN1/APOE/VEGFA/PROS1/EMP2/PAM/GJA1/LSR/ITGA2/ENTPD1/RAB27A/FCER1G/GAS6/PLAU/CLIC1/PRKACB/PLAUR/STMN1	24
GO:0010595	BP	GO:0010595	positive regulation of endothelial cell migration	12/593	133/18723	0.00107474	0.0141127	0.0106241	LCN2/MET/VEGFA/ANXA1/ANXA3/CALR/NRP2/RRAS/SASH1/SPARC/TMSB4X/TGFB1	12
GO:0050766	BP	GO:0050766	positive regulation of phagocytosis	8/593	66/18723	0.00110136	0.014422	0.010857	CALR/ITGA2/MFGE8/RAB27A/PYCARD/PTPRC/FCER1G/GAS6	8
GO:0098754	BP	GO:0098754	detoxification	13/593	152/18723	0.00111352	0.0145342	0.0109415	GPX3/APOE/GPX4/TPO/PRDX1/BMP7/GSTM3/ALDH1A1/SLC22A18/PIM1/ALOX5AP/MT1F/MT1X	13
GO:0042129	BP	GO:0042129	regulation of T cell proliferation	14/593	171/18723	0.00111612	0.0145342	0.0109415	CD24/SDC4/LGALS3/ANXA1/CD55/ARG2/TNFSF13B/PYCARD/TNFRSF1B/CD3E/PTPRC/CCL5/LGALS9/PNP	14
GO:0060537	BP	GO:0060537	muscle tissue development	25/593	403/18723	0.00113924	0.0147943	0.0111373	CAV1/VEGFA/NUPR1/GJA1/CALR/LRP2/SORBS2/BMP7/EGR1/ADAMTS9/DDX17/DMD/ARNTL/NEBL/TIPARP/FLNB/VGLL4/PIM1/MEF2C/RGS2/ATF3/TGFB1/BCL2/NR4A1/FOS	25
GO:0042596	BP	GO:0042596	fear response	6/593	38/18723	0.00114567	0.014813	0.0111514	MDK/APOE/DPP4/GJA1/MEF2C/BCL2	6
GO:0045732	BP	GO:0045732	positive regulation of protein catabolic process	17/593	231/18723	0.00114698	0.014813	0.0111514	CLU/CAV1/APOE/NUPR1/LRRK2/GJA1/LRP2/PRICKLE1/HECTD1/TIPARP/VGLL4/PYHIN1/TNFRSF1B/TNFAIP3/DAB2/HERPUD1/MSN	17
GO:0050808	BP	GO:0050808	synapse organization	26/593	426/18723	0.00115636	0.0148932	0.0112117	NTRK2/APOE/LRRK2/ITGA3/FLRT3/MYH10/PTPRF/IGFN1/PLXNB2/NFIA/GABRB2/NRP2/EPHA4/AGRN/LRP4/ANK3/NRCAM/SPARC/ABI3/TUBA1A/SDCBP/MEF2C/C1QC/C1QB/C1QA/SEMA4D	26
GO:0019221	BP	GO:0019221	cytokine-mediated signaling pathway	28/593	472/18723	0.00116784	0.0149423	0.0112487	CD24/CAV1/EGR1/ECM1/PARP14/SLIT3/AGPAT2/TNFSF13B/PYCARD/SPI1/TNFRSF1B/NFKBIA/TNFRSF4/TNFAIP3/CCL3L3/IL7R/TMSB4X/PTPRC/FCER1G/CCL5/CCL4/GAS6/TNFRSF18/CD44/PLP2/IFITM3/CYLD/CXCL8	28
GO:0033209	BP	GO:0033209	tumor necrosis factor-mediated signaling pathway	10/593	99/18723	0.00116951	0.0149423	0.0112487	TNFSF13B/PYCARD/TNFRSF1B/NFKBIA/TNFRSF4/TNFAIP3/TMSB4X/GAS6/TNFRSF18/CYLD	10
GO:0061448	BP	GO:0061448	connective tissue development	18/593	252/18723	0.00116971	0.0149423	0.0112487	MDK/CHI3L1/TIMP1/BMP7/EGR1/ECM1/HMGA2/POR/CREB3L2/MBOAT2/ANXA6/RUNX3/SPI1/MEF2C/TGFBI/TGFB1/MGP/CD44	18
GO:0060669	BP	GO:0060669	embryonic placenta morphogenesis	5/593	26/18723	0.00118656	0.0150351	0.0113185	SPINT1/ZFP36L1/BMP7/ST14/SOCS3	5
GO:0097066	BP	GO:0097066	response to thyroid hormone	5/593	26/18723	0.00118656	0.0150351	0.0113185	CTSB/CTSH/HPN/KLF9/CTSS	5
GO:2000108	BP	GO:2000108	positive regulation of leukocyte apoptotic process	5/593	26/18723	0.00118656	0.0150351	0.0113185	ANXA1/MEF2C/CCL5/LGALS9/BAX	5
GO:0048568	BP	GO:0048568	embryonic organ development	26/593	427/18723	0.00119565	0.0151095	0.0113745	KRT19/PAX8/VEGFA/CITED1/TPO/SPINT1/PHLDA2/ZFP36L1/FOXE1/MYO6/FOLR1/BMP7/HPN/ST14/RAD23B/HECTD1/RARRES2/FBN1/SOCS3/JUNB/MEF2C/TGFB1/SLC9A3R1/CXCL8/TRA2B/PRDM1	26
GO:0010594	BP	GO:0010594	regulation of endothelial cell migration	17/593	232/18723	0.00120232	0.0151531	0.0114073	LCN2/MET/APOE/VEGFA/ANXA1/ANXA3/EMP2/CALR/NRP2/RRAS/ADAMTS9/SASH1/SPARC/MEF2C/TMSB4X/TGFB1/KLF4	17
GO:0035914	BP	GO:0035914	skeletal muscle cell differentiation	8/593	67/18723	0.00121668	0.0152931	0.0115127	NUPR1/EGR1/DDX17/ARNTL/MEF2C/ATF3/NR4A1/FOS	8
GO:0097305	BP	GO:0097305	response to alcohol	18/593	253/18723	0.00122325	0.0153346	0.011544	CCND1/CLDN1/EPS8/SREBF1/SLIT3/SPARC/SPI1/CD27/KLF2/RGS2/TGFB1/EIF4EBP1/CDKN1A/KLF9/ATP2B1/KLF4/FOSB/FOS	18
GO:0048678	BP	GO:0048678	response to axon injury	9/593	83/18723	0.0012335	0.0154134	0.0116033	FLRT3/PTPRF/FOLR1/EPHA4/TYROBP/LGALS1/BCL2/KLF4/BAX	9
GO:0043254	BP	GO:0043254	regulation of protein-containing complex assembly	26/593	428/18723	0.00123608	0.0154134	0.0116033	CLU/LGALS3/CRYAB/MET/APOE/VEGFA/HSPA5/EPS8/INPP5J/KIF9/MAP2/TENM1/TMSB10/PYCARD/TMSB4X/VASP/TGFB1/MYADM/BIN1/EIF4EBP1/ATM/IQGAP2/DDX3X/BAX/STMN1/MSN	26
GO:0030856	BP	GO:0030856	regulation of epithelial cell differentiation	13/593	154/18723	0.00125526	0.015611	0.0117521	CD24/CAV1/PAX8/CCND1/ID1/VEGFA/CITED1/ZFP36L1/ERRFI1/ZBED2/CD109/SPRY1/ZFP36	13
GO:0060840	BP	GO:0060840	artery development	10/593	100/18723	0.00126346	0.0156716	0.0117977	MDK/SOX4/APOE/VEGFA/FOLR1/LRP2/ADAMTS9/PRICKLE1/HECTD1/PRDM1	10
GO:0050731	BP	GO:0050731	positive regulation of peptidyl-tyrosine phosphorylation	15/593	193/18723	0.0012784	0.0158152	0.0119058	CD24/VEGFA/AFAP1L2/EPHA4/LRP4/PARP14/AREG/CD3E/PTPRC/CCL5/GAS6/TNFRSF18/SEMA4D/TGFB1/CD44	15
GO:0014706	BP	GO:0014706	striated muscle tissue development	24/593	384/18723	0.001283	0.0158304	0.0119172	CAV1/VEGFA/NUPR1/GJA1/CALR/LRP2/SORBS2/BMP7/EGR1/ADAMTS9/DDX17/DMD/ARNTL/NEBL/FLNB/VGLL4/PIM1/MEF2C/RGS2/ATF3/TGFB1/BCL2/NR4A1/FOS	24
GO:0002347	BP	GO:0002347	response to tumor cell	6/593	39/18723	0.00131825	0.0161804	0.0121807	RBMS3/ABI3/SPI1/TXNIP/PRF1/KLF4	6
GO:1903115	BP	GO:1903115	regulation of actin filament-based movement	6/593	39/18723	0.00131825	0.0161804	0.0121807	CAV1/KCNJ2/ATP1A1/PDE4B/DSC2/BIN1	6
GO:0007519	BP	GO:0007519	skeletal muscle tissue development	13/593	155/18723	0.00133157	0.0161961	0.0121926	CAV1/NUPR1/EGR1/DDX17/DMD/ARNTL/FLNB/MEF2C/ATF3/TGFB1/BCL2/NR4A1/FOS	13
GO:1903362	BP	GO:1903362	regulation of cellular protein catabolic process	18/593	255/18723	0.0013366	0.0161961	0.0121926	CLU/CAV1/APOE/NUPR1/LRRK2/LRP2/EPHA4/PRICKLE1/GIPC1/RAD23B/HECTD1/VGLL4/PYHIN1/SDCBP/TNFAIP3/DAB2/HERPUD1/MSN	18
GO:0006978	BP	GO:0006978	DNA damage response, signal transduction by p53 class mediator resulting in transcription of p21 class mediator	4/593	16/18723	0.00133794	0.0161961	0.0121926	MUC1/RPS27L/PYHIN1/CDKN1A	4
GO:1901214	BP	GO:1901214	regulation of neuron death	21/593	319/18723	0.00133893	0.0161961	0.0121926	CLU/MDK/LCN2/NTRK2/APOE/CITED1/NUPR1/LRRK2/GABRB2/EGR1/TRIM2/TNFRSF1B/NR4A2/MEF2C/C1QA/CCL5/TYROBP/DDIT4/BCL2/BAX/FOS	21
GO:0010921	BP	GO:0010921	regulation of phosphatase activity	9/593	84/18723	0.00134357	0.0161961	0.0121926	LGALS3/HSP90B1/SLC39A10/ITGA2/MEF2C/PTPRC/PPP6R3/SEMA4D/PPP1R15A	9
GO:0002707	BP	GO:0002707	negative regulation of lymphocyte mediated immunity	7/593	53/18723	0.00134365	0.0161961	0.0121926	CD55/SERPINB9/CD96/HLA-B/IL7R/PTPRC/LGALS9	7
GO:0043620	BP	GO:0043620	regulation of DNA-templated transcription in response to stress	7/593	53/18723	0.00134365	0.0161961	0.0121926	MUC1/VEGFA/HSPA5/EGR1/KLF2/ATF3/DNAJB1	7
GO:0042102	BP	GO:0042102	positive regulation of T cell proliferation	10/593	101/18723	0.00136348	0.0163931	0.0123408	CD24/ANXA1/CD55/TNFSF13B/PYCARD/CD3E/PTPRC/CCL5/LGALS9/PNP	10
GO:0090090	BP	GO:0090090	negative regulation of canonical Wnt signaling pathway	12/593	137/18723	0.00138992	0.0166684	0.0125481	CAV1/MDK/IGFBP6/APOE/EGR1/PRICKLE1/RBMS3/LRP4/DAB2/SLC9A3R1/TLE4/CYLD	12
GO:0001764	BP	GO:0001764	neuron migration	13/593	156/18723	0.00141171	0.0168438	0.0126801	MDK/NTRK2/VEGFA/ITGA3/PLXNB2/NRP2/NRCAM/SPOCK1/NR4A2/MEF2C/GAS6/DDIT4/BAX	13
GO:0009267	BP	GO:0009267	cellular response to starvation	13/593	156/18723	0.00141171	0.0168438	0.0126801	DAPL1/LRRK2/HSPA5/SREBF1/XPR1/INHBB/GAS6/ATF3/BCL2/CDKN1A/PMAIP1/GABARAPL1/SLC38A2	13
GO:0001656	BP	GO:0001656	metanephros development	9/593	85/18723	0.00146142	0.0173489	0.0130604	PAX8/CTSH/CITED1/BMP7/EGR1/BASP1/SPRY1/FBN1/BCL2	9
GO:0045069	BP	GO:0045069	regulation of viral genome replication	9/593	85/18723	0.00146142	0.0173489	0.0130604	SLPI/HMGA2/ISG20/CCL5/PKN2/BCL2/DDX3X/IFITM3/CXCL8	9
GO:0032677	BP	GO:0032677	regulation of interleukin-8 production	10/593	102/18723	0.00146983	0.0174048	0.0131024	CHI3L1/ANXA1/AFAP1L2/PYCARD/TMSB4X/CD2/PTPRC/LGALS9/CD58/KLF4	10
GO:0001837	BP	GO:0001837	epithelial to mesenchymal transition	13/593	157/18723	0.00149581	0.0176466	0.0132845	MDK/BMP7/HPN/DDX17/HMGA2/EPB41L5/VASN/SPRY1/GLIPR2/SDCBP/DAB2/TGFB1/S100A4	13
GO:0043410	BP	GO:0043410	positive regulation of MAPK cascade	28/593	480/18723	0.00149776	0.0176466	0.0132845	CD24/NTRK2/IGFBP6/TPD52L1/APOE/VEGFA/CHI3L1/GDF15/LRRK2/EPHA4/TENM1/SASH1/TNIK/GLIPR2/PYCARD/SPI1/CD27/SDCBP/CCL3L3/GPR183/PTPRC/CCL5/CCL4/GAS6/LGALS9/TGFB1/CD44/GADD45B	28
GO:0031348	BP	GO:0031348	negative regulation of defense response	18/593	258/18723	0.00152328	0.0179024	0.013477	MDK/APOE/ARG2/NT5E/PARP14/SERPINB9/CD96/SOCS3/TNFRSF1B/FGL2/HLA-B/ZFP36/TNFAIP3/CST7/PTPRC/LGALS9/KLF4/RORA	18
GO:0043405	BP	GO:0043405	regulation of MAP kinase activity	14/593	177/18723	0.00155197	0.0181941	0.0136966	CD24/CAV1/TPD52L1/APOE/VEGFA/LRRK2/BMP7/EPHA4/TENM1/SASH1/SPRY1/RGS2/TGFB1/DUSP1	14
GO:0010952	BP	GO:0010952	positive regulation of peptidase activity	15/593	197/18723	0.00156796	0.0182903	0.0137691	FN1/CAV1/PERP/CTSH/MTCH1/EPHA4/RPS27L/PYCARD/ASPH/LGALS9/TNFSF10/CYCS/DDX3X/PMAIP1/BAX	15
GO:0042594	BP	GO:0042594	response to starvation	15/593	197/18723	0.00156796	0.0182903	0.0137691	DAPL1/LRRK2/HSPA5/SREBF1/XPR1/INHBB/ZFP36/GAS6/ATF3/EIF4EBP1/BCL2/CDKN1A/PMAIP1/GABARAPL1/SLC38A2	15
GO:0030216	BP	GO:0030216	keratinocyte differentiation	12/593	139/18723	0.00157406	0.018316	0.0137884	ASAH1/ANXA1/ZFP36L1/PPL/ERRFI1/ZBED2/SCEL/ST14/CD109/FLNB/TXNIP/ZFP36	12
GO:0030593	BP	GO:0030593	neutrophil chemotaxis	10/593	103/18723	0.00158283	0.0183273	0.0137969	MDK/LGALS3/DAPK2/DPP4/PDE4B/CCL3L3/FCER1G/CCL5/CCL4/CXCL8	10
GO:0032637	BP	GO:0032637	interleukin-8 production	10/593	103/18723	0.00158283	0.0183273	0.0137969	CHI3L1/ANXA1/AFAP1L2/PYCARD/TMSB4X/CD2/PTPRC/LGALS9/CD58/KLF4	10
GO:0002455	BP	GO:0002455	humoral immune response mediated by circulating immunoglobulin	11/593	121/18723	0.00161078	0.0186051	0.014006	CLU/CD55/CFI/TRBC1/C1QC/C1QB/C1QA/IGHG4/TRBC2/PTPRC/IGHG1	11
GO:0031099	BP	GO:0031099	regeneration	15/593	198/18723	0.00164836	0.0189254	0.0142472	MDK/CCND1/CLDN1/ANXA1/CPQ/ANXA3/PTPRF/FOLR1/EPHA4/IGF2R/NINJ1/GAS6/BCL2/CDKN1A/KLF4	15
GO:0001558	BP	GO:0001558	regulation of cell growth	25/593	414/18723	0.00165059	0.0189254	0.0142472	FN1/CRYAB/APOE/VEGFA/CHPT1/DCBLD2/DCSTAMP/GJA1/CRABP2/HPN/GOLGA4/LTBP4/MAP2/NRCAM/SPOCK1/SLIT3/VGLL4/SDCBP/SGK1/RGS2/SEMA4D/TGFB1/BCL2/CDKN1A/DDX3X	25
GO:0043434	BP	GO:0043434	response to peptide hormone	25/593	414/18723	0.00165059	0.0189254	0.0142472	CAV1/TSHR/CITED1/TIMP1/GDF15/ANXA1/ZFP36L1/GJA1/ERRFI1/BMP7/EGR1/SREBF1/INHBB/POR/RARRES2/FBN1/SPARC/SOCS3/NR4A2/AREG/RAB8B/TNFSF10/CCND3/ATP2B1/NR4A1	25
GO:0050673	BP	GO:0050673	epithelial cell proliferation	26/593	437/18723	0.00165649	0.0189469	0.0142633	CAV1/MDK/CCND1/CLDN1/APOE/ID1/VEGFA/NUPR1/COL8A1/ZFP36L1/GJA1/NRP2/ERRFI1/ECM1/HPN/CD109/SPARC/RUNX3/AREG/MEF2C/ZFP36/TNFAIP3/TGFB1/KLF9/BAX/NR4A1	26
GO:0002313	BP	GO:0002313	mature B cell differentiation involved in immune response	5/593	28/18723	0.0016827	0.0190611	0.0143493	IRF8/SPI1/ITM2A/GPR183/LGALS1	5
GO:0002507	BP	GO:0002507	tolerance induction	5/593	28/18723	0.0016827	0.0190611	0.0143493	ICOS/HLA-B/TNFAIP3/CD3E/LGALS9	5
GO:0031342	BP	GO:0031342	negative regulation of cell killing	5/593	28/18723	0.0016827	0.0190611	0.0143493	SERPINB9/HLA-B/IL7R/PTPRC/LGALS9	5
GO:0090200	BP	GO:0090200	positive regulation of release of cytochrome c from mitochondria	5/593	28/18723	0.0016827	0.0190611	0.0143493	PYCARD/TNFSF10/PLAUR/PMAIP1/BAX	5
GO:0030002	BP	GO:0030002	cellular anion homeostasis	4/593	17/18723	0.00170614	0.0191422	0.0144104	SLC34A2/CKB/XPR1/SLC9A3R1	4
GO:0042772	BP	GO:0042772	DNA damage response, signal transduction resulting in transcription	4/593	17/18723	0.00170614	0.0191422	0.0144104	MUC1/RPS27L/PYHIN1/CDKN1A	4
GO:0055119	BP	GO:0055119	relaxation of cardiac muscle	4/593	17/18723	0.00170614	0.0191422	0.0144104	KCNJ2/ATP1A1/PDE4B/RGS2	4
GO:0097067	BP	GO:0097067	cellular response to thyroid hormone stimulus	4/593	17/18723	0.00170614	0.0191422	0.0144104	CTSB/CTSH/KLF9/CTSS	4
GO:1990266	BP	GO:1990266	neutrophil migration	11/593	122/18723	0.00172109	0.0192287	0.0144755	MDK/LGALS3/DAPK2/DPP4/PDE4B/RHOH/CCL3L3/FCER1G/CCL5/CCL4/CXCL8	11
GO:0150104	BP	GO:0150104	transport across blood-brain barrier	9/593	87/18723	0.00172203	0.0192287	0.0144755	APOE/LRP2/ATP8A1/SLC7A2/ABCC3/FABP5/SLC9A3R1/SLC38A1/SLC38A2	9
GO:0031333	BP	GO:0031333	negative regulation of protein-containing complex assembly	12/593	141/18723	0.00177784	0.0198048	0.0149092	CLU/CRYAB/HSPA5/EPS8/INPP5J/MAP2/TMSB10/TMSB4X/MYADM/EIF4EBP1/DDX3X/STMN1	12
GO:0016311	BP	GO:0016311	dephosphorylation	25/593	417/18723	0.00182031	0.0202299	0.0152292	LGALS3/HSP90B1/DUSP6/LRRK2/ATP1A1/PTPRF/SLC39A10/DUSP5/INPP5J/PLPP2/ITGA2/PTPN13/NT5E/NT5C2/NT5C3B/MEF2C/PTPRC/PPP6R3/DUSP23/SEMA4D/TGFB1/BCL2/DUSP4/DUSP1/PPP1R15A	25
GO:0071219	BP	GO:0071219	cellular response to molecule of bacterial origin	16/593	221/18723	0.00187262	0.0207622	0.01563	LCN2/CD55/SASH1/LY86/IRF8/PYCARD/PDE4B/SPI1/TNFRSF1B/NFKBIA/MEF2C/ZFP36/TNFAIP3/CCL5/TGFB1/CXCL8	16
GO:0003018	BP	GO:0003018	vascular process in circulatory system	18/593	263/18723	0.00188341	0.0208328	0.0156831	CAV1/APOE/VEGFA/GJA1/LRP2/ATP8A1/ECE1/SLC7A2/SCPEP1/ABCC3/KLF2/RGS2/FABP5/TGFB1/SLC9A3R1/ATP2B1/SLC38A1/SLC38A2	18
GO:0033627	BP	GO:0033627	cell adhesion mediated by integrin	8/593	72/18723	0.00194548	0.0214688	0.0161619	TESC/MUC1/DPP4/ITGA2/FBN1/CD3E/CCL5/PLAU	8
GO:0009154	BP	GO:0009154	purine ribonucleotide catabolic process	6/593	42/18723	0.00195637	0.021488	0.0161764	PDE5A/PDE8B/NT5E/NT5C2/PDE4B/PNP	6
GO:1902895	BP	GO:1902895	positive regulation of pri-miRNA transcription by RNA polymerase II	6/593	42/18723	0.00195637	0.021488	0.0161764	EGR1/SPI1/TGFB1/NR3C1/KLF4/FOS	6
GO:1902430	BP	GO:1902430	negative regulation of amyloid-beta formation	5/593	29/18723	0.00198097	0.021609	0.0162674	CLU/NTRK2/APOE/RTN3/BIN1	5
GO:0051100	BP	GO:0051100	negative regulation of binding	13/593	162/18723	0.00198117	0.021609	0.0162674	SLPI/CAV1/ID1/LRRK2/PTPRF/HMGA2/MAP2/EPB41L5/NFKBIA/TMSB4X/DAB2/CDKN1A/BAX	13
GO:0060759	BP	GO:0060759	regulation of response to cytokine stimulus	13/593	162/18723	0.00198117	0.021609	0.0162674	CD24/CAV1/ECM1/PARP14/SLIT3/AGPAT2/PYCARD/TNFAIP3/PTPRC/CCL5/GAS6/KLF4/CYLD	13
GO:0038061	BP	GO:0038061	NIK/NF-kappaB signaling	12/593	143/18723	0.00200281	0.0217706	0.0163891	CHI3L1/PRDX1/CALR/BMP7/SASH1/SPI1/CD27/NFKBIA/TMSB4X/LGALS9/DDX3X/CYLD	12
GO:0009913	BP	GO:0009913	epidermal cell differentiation	15/593	202/18723	0.00200525	0.0217706	0.0163891	ASAH1/ANXA1/ZFP36L1/MYO6/PPL/ERRFI1/ZBED2/SCEL/ST14/CD109/FLNB/TXNIP/ZFP36/SLC9A3R1/KLF4	15
GO:0061138	BP	GO:0061138	morphogenesis of a branching epithelium	14/593	182/18723	0.00201594	0.0218363	0.0164385	TACSTD2/MDK/PAX8/MET/CTSH/VEGFA/CITED1/SPINT1/BMP7/ST14/SPRY1/SOCS3/AREG/BCL2	14
GO:0006898	BP	GO:0006898	receptor-mediated endocytosis	17/593	244/18723	0.00206347	0.0222997	0.0167874	CLU/CAV1/APOE/VEGFA/CD63/APOC1/CLTA/CANX/FOLR1/LRP2/IGF2R/MSR1/SDCBP/FCER1G/DAB2/AP1S1/CXCL8	17
GO:0033135	BP	GO:0033135	regulation of peptidyl-serine phosphorylation	12/593	144/18723	0.00212374	0.0228665	0.0172141	CAV1/NTRK2/VEGFA/INPP5J/TENM1/DMD/GAS6/TGFB1/DDIT4/BCL2/CD44/BAX	12
GO:0032732	BP	GO:0032732	positive regulation of interleukin-1 production	8/593	73/18723	0.00212565	0.0228665	0.0172141	S100A13/EGR1/IL16/PYHIN1/PYCARD/MNDA/TYROBP/LGALS9	8
GO:0002283	BP	GO:0002283	neutrophil activation involved in immune response	4/593	18/18723	0.00213916	0.022907	0.0172446	ANXA3/SPI1/FCER1G/TYROBP	4
GO:0060192	BP	GO:0060192	negative regulation of lipase activity	4/593	18/18723	0.00213916	0.022907	0.0172446	ANXA1/APOC1/POR/RGS2	4
GO:0050792	BP	GO:0050792	regulation of viral process	13/593	164/18723	0.00220857	0.0235965	0.0177636	SLPI/HMGA2/ISG20/ZFP36/CCL5/PKN2/LGALS9/LGALS1/BCL2/TRIM22/DDX3X/IFITM3/CXCL8	13
GO:0036230	BP	GO:0036230	granulocyte activation	6/593	43/18723	0.00221379	0.0235987	0.0177652	ANXA3/SPI1/FCER1G/CCL5/TYROBP/CXCL8	6
GO:0006958	BP	GO:0006958	complement activation, classical pathway	10/593	108/18723	0.00225825	0.0240182	0.0180811	CLU/CD55/CFI/TRBC1/C1QC/C1QB/C1QA/IGHG4/TRBC2/IGHG1	10
GO:0001954	BP	GO:0001954	positive regulation of cell-matrix adhesion	7/593	58/18723	0.00228813	0.024281	0.0182789	SDC4/VEGFA/EMP2/CCL28/RRAS/EPB41L5/CD3E	7
GO:0033137	BP	GO:0033137	negative regulation of peptidyl-serine phosphorylation	5/593	30/18723	0.0023161	0.0244946	0.0184397	CAV1/INPP5J/DMD/DDIT4/BAX	5
GO:0048844	BP	GO:0048844	artery morphogenesis	8/593	74/18723	0.00231868	0.0244946	0.0184397	MDK/SOX4/APOE/VEGFA/FOLR1/LRP2/ADAMTS9/PRDM1	8
GO:0032956	BP	GO:0032956	regulation of actin cytoskeleton organization	22/593	358/18723	0.00247095	0.0260447	0.0196067	TACSTD2/SDC4/MDK/MET/ID1/DSTN/PAM/EPS8/RHOBTB3/LIMCH1/TENM1/ABI3/TMSB10/PYCARD/RHOH/TMSB4X/ARHGDIB/VASP/MYADM/BIN1/IQGAP2/STMN1	22
GO:0048066	BP	GO:0048066	developmental pigmentation	6/593	44/18723	0.00249592	0.0262491	0.0197605	CITED1/CD63/RAB27A/MEF2C/BCL2/BAX	6
GO:0033077	BP	GO:0033077	T cell differentiation in thymus	8/593	75/18723	0.00252519	0.0263955	0.0198707	ZFP36L1/ZFP36L2/CD3G/CD3E/IL7R/PTPRC/CD3D/BCL2	8
GO:0043627	BP	GO:0043627	response to estrogen	8/593	75/18723	0.00252519	0.0263955	0.0198707	KRT19/CD24/CAV1/SLC34A2/CCND1/CITED1/GSTM3/SERPINB9	8
GO:0050732	BP	GO:0050732	negative regulation of peptidyl-tyrosine phosphorylation	7/593	59/18723	0.00252669	0.0263955	0.0198707	CAV1/ERRFI1/PARP14/SOCS3/PTPRC/SEMA4D/SH3BP5	7
GO:0016064	BP	GO:0016064	immunoglobulin mediated immune response	15/593	207/18723	0.00253962	0.0264717	0.0199281	CLU/CD55/CFI/CD27/HLA-DQB1/TRBC1/C1QC/C1QB/C1QA/IGHG4/TRBC2/PTPRC/FCER1G/TGFB1/IGHG1	15
GO:1901653	BP	GO:1901653	cellular response to peptide	22/593	359/18723	0.0025565	0.0265887	0.0200162	CAV1/LCN2/TSHR/ID1/GDF15/ZFP36L1/GJA1/ERRFI1/SREBF1/EPHA4/INHBB/POR/RARRES2/FBN1/SOCS3/NR4A2/KLF2/RAB8B/CCND3/ATP2B1/KLF4/NR4A1	22
GO:0002716	BP	GO:0002716	negative regulation of natural killer cell mediated immunity	4/593	19/18723	0.00264242	0.0272412	0.0205074	SERPINB9/CD96/HLA-B/LGALS9	4
GO:0006977	BP	GO:0006977	DNA damage response, signal transduction by p53 class mediator resulting in cell cycle arrest	4/593	19/18723	0.00264242	0.0272412	0.0205074	SOX4/MUC1/CDKN1A/ATM	4
GO:0048245	BP	GO:0048245	eosinophil chemotaxis	4/593	19/18723	0.00264242	0.0272412	0.0205074	LGALS3/DAPK2/CCL5/CCL4	4
GO:1901659	BP	GO:1901659	glycosyl compound biosynthetic process	4/593	19/18723	0.00264242	0.0272412	0.0205074	NT5E/ADK/PNP/AMD1	4
GO:0032535	BP	GO:0032535	regulation of cellular component size	23/593	383/18723	0.00266635	0.0272727	0.0205311	FN1/APOE/VEGFA/DSTN/EPS8/CRABP2/GOLGA4/MAP2/TENM1/NRCAM/TMSB10/PYCARD/IL7R/TMSB4X/SEMA4D/VASP/TMEM123/MYADM/SLC9A3R1/BIN1/IQGAP2/PPP1R15A/MSN	23
GO:0010212	BP	GO:0010212	response to ionizing radiation	12/593	148/18723	0.00266868	0.0272727	0.0205311	CRYAB/CCND1/ANXA1/HSPA5/EGR1/HMGA2/CCND2/PTPRC/BCL2/CDKN1A/ATM/BAX	12
GO:1903900	BP	GO:1903900	regulation of viral life cycle	12/593	148/18723	0.00266868	0.0272727	0.0205311	SLPI/HMGA2/ISG20/CCL5/PKN2/LGALS9/LGALS1/BCL2/TRIM22/DDX3X/IFITM3/CXCL8	12
GO:2001056	BP	GO:2001056	positive regulation of cysteine-type endopeptidase activity	12/593	148/18723	0.00266868	0.0272727	0.0205311	PERP/CTSH/MTCH1/RPS27L/PYCARD/ASPH/LGALS9/TNFSF10/CYCS/DDX3X/PMAIP1/BAX	12
GO:0007498	BP	GO:0007498	mesoderm development	11/593	129/18723	0.00267806	0.0273092	0.0205586	VEGFA/ITGA3/ZFP36L1/GJA1/BMP7/ITGA2/HMGA2/EPB41L5/IKZF1/IKZF3/KLF4	11
GO:0001782	BP	GO:0001782	B cell homeostasis	5/593	31/18723	0.00269061	0.0273187	0.0205657	TNFSF13B/MEF2C/TNFAIP3/BCL2/BAX	5
GO:0071480	BP	GO:0071480	cellular response to gamma radiation	5/593	31/18723	0.00269061	0.0273187	0.0205657	CRYAB/HSPA5/EGR1/CDKN1A/ATM	5
GO:0060993	BP	GO:0060993	kidney morphogenesis	9/593	93/18723	0.00273339	0.027651	0.0208159	TACSTD2/PAX8/SOX4/VEGFA/CITED1/LRRK2/BMP7/BASP1/BCL2	9
GO:0070997	BP	GO:0070997	neuron death	22/593	361/18723	0.0027351	0.027651	0.0208159	CLU/MDK/LCN2/NTRK2/APOE/CITED1/NUPR1/LRRK2/HSPA5/GABRB2/EGR1/TRIM2/TNFRSF1B/NR4A2/MEF2C/C1QA/CCL5/TYROBP/DDIT4/BCL2/BAX/FOS	22
GO:0086001	BP	GO:0086001	cardiac muscle cell action potential	8/593	76/18723	0.00274581	0.0276996	0.0208525	CAV1/KCNJ2/ATP1A1/GJA1/ANK3/DMD/DSC2/BIN1	8
GO:0031638	BP	GO:0031638	zymogen activation	7/593	60/18723	0.00278393	0.0280241	0.0210967	PERP/CTSH/HPN/PYCARD/ASPH/PLAU/PGK1	7
GO:0019724	BP	GO:0019724	B cell mediated immunity	15/593	210/18723	0.00291331	0.0292638	0.02203	CLU/CD55/CFI/CD27/HLA-DQB1/TRBC1/C1QC/C1QB/C1QA/IGHG4/TRBC2/PTPRC/FCER1G/TGFB1/IGHG1	15
GO:0019080	BP	GO:0019080	viral gene expression	9/593	94/18723	0.0029401	0.0294699	0.0221852	CANX/MGAT4B/HPN/HMGA2/ZFP36/CCL5/CCL4/MGAT1/IFITM3	9
GO:0046632	BP	GO:0046632	alpha-beta T cell differentiation	10/593	112/18723	0.00295084	0.0295147	0.0222189	TMEM98/ANXA1/ITK/RUNX3/GPR183/LGALS9/BCL2/PNP/RORA/PRDM1	10
GO:0001959	BP	GO:0001959	regulation of cytokine-mediated signaling pathway	12/593	150/18723	0.00298096	0.0296918	0.0223522	CD24/CAV1/ECM1/PARP14/SLIT3/AGPAT2/PYCARD/TNFAIP3/PTPRC/CCL5/GAS6/CYLD	12
GO:0055117	BP	GO:0055117	regulation of cardiac muscle contraction	8/593	77/18723	0.00298118	0.0296918	0.0223522	CAV1/KCNJ2/ATP1A1/DMD/PDE4B/RGS2/DSC2/BIN1	8
GO:0019079	BP	GO:0019079	viral genome replication	11/593	131/18723	0.00301879	0.0299395	0.0225387	SLPI/NFIA/HMGA2/ISG20/CCL5/PKN2/GAS6/BCL2/DDX3X/IFITM3/CXCL8	11
GO:0046683	BP	GO:0046683	response to organophosphorus	11/593	131/18723	0.00301879	0.0299395	0.0225387	HSP90B1/CITED1/HSPA5/ZFP36L1/SREBF1/SDC1/SPARC/AREG/DUSP1/FOSB/FOS	11
GO:0007346	BP	GO:0007346	regulation of mitotic cell cycle	26/593	457/18723	0.00304859	0.0301714	0.0227132	CCND1/SOX4/MUC1/ANXA1/ZFP36L1/BMP7/TMEM14B/AFAP1L2/HMGA2/RPS27L/CCND2/CDC27/SDCBP/ZFP36L2/PKN2/TGFB1/SLC9A3R1/EIF4EBP1/BCL2/CDKN1A/ATM/CCND3/DUSP1/DDX3X/KLF4/CYLD	26
GO:0010039	BP	GO:0010039	response to iron ion	5/593	32/18723	0.00310708	0.0306214	0.023052	LCN2/CCND1/CYBRD1/C1QA/BCL2	5
GO:0072337	BP	GO:0072337	modified amino acid transport	5/593	32/18723	0.00310708	0.0306214	0.023052	GJA1/FOLR1/LRP2/SLC9A3R1/SLC38A2	5
GO:0006195	BP	GO:0006195	purine nucleotide catabolic process	6/593	46/18723	0.00314017	0.0308182	0.0232002	PDE5A/PDE8B/NT5E/NT5C2/PDE4B/PNP	6
GO:0043616	BP	GO:0043616	keratinocyte proliferation	6/593	46/18723	0.00314017	0.0308182	0.0232002	MDK/ZFP36L1/CD109/AREG/ZFP36/KLF9	6
GO:0006942	BP	GO:0006942	regulation of striated muscle contraction	9/593	95/18723	0.00315895	0.0308737	0.0232419	CAV1/KCNJ2/ATP1A1/DMD/PDE4B/RGS2/DSC2/BIN1/NR4A1	9
GO:0008585	BP	GO:0008585	female gonad development	9/593	95/18723	0.00315895	0.0308737	0.0232419	VEGFA/NUPR1/HSPA5/INHBB/NRIP1/TIPARP/SLIT3/BCL2/BAX	9
GO:0009169	BP	GO:0009169	purine ribonucleoside monophosphate catabolic process	3/593	10/18723	0.00321155	0.0312226	0.0235046	NT5E/NT5C2/PNP	3
GO:0097278	BP	GO:0097278	complement-dependent cytotoxicity	3/593	10/18723	0.00321155	0.0312226	0.0235046	CD55/CFH/RAB27A	3
GO:0071243	BP	GO:0071243	cellular response to arsenic-containing substance	4/593	20/18723	0.00322122	0.0312226	0.0235046	MAPK13/ATF3/DDX3X/SLC38A2	4
GO:1990182	BP	GO:1990182	exosomal secretion	4/593	20/18723	0.00322122	0.0312226	0.0235046	SDC4/SDC1/RAB27A/SDCBP	4
GO:0048732	BP	GO:0048732	gland development	25/593	436/18723	0.00328137	0.0317402	0.0238942	TG/CAV1/MDK/PAX8/CCND1/MET/CLDN1/VEGFA/ELF3/ANXA1/PAM/FOXE1/BMP7/ARHGAP5/LSR/ITGA2/HPN/IGF2R/AREG/TNFAIP3/TGFB1/SLC9A3R1/BCL2/BAX/MSN	25
GO:0032872	BP	GO:0032872	regulation of stress-activated MAPK cascade	14/593	192/18723	0.00329074	0.0317654	0.0239133	IGFBP6/TPD52L1/VEGFA/PRDX1/SASH1/ZMYND11/TNIK/PYCARD/SPI1/CD27/SDCBP/DUSP1/GADD45B/CYLD	14
GO:0046660	BP	GO:0046660	female sex differentiation	10/593	114/18723	0.00335559	0.0320869	0.0241553	VEGFA/NUPR1/HSPA5/LRP2/INHBB/NRIP1/TIPARP/SLIT3/BCL2/BAX	10
GO:0032623	BP	GO:0032623	interleukin-2 production	7/593	62/18723	0.00335817	0.0320869	0.0241553	ANXA1/PDE4B/ZFP36/TNFAIP3/CD3E/PTPRC/PNP	7
GO:0032663	BP	GO:0032663	regulation of interleukin-2 production	7/593	62/18723	0.00335817	0.0320869	0.0241553	ANXA1/PDE4B/ZFP36/TNFAIP3/CD3E/PTPRC/PNP	7
GO:0060393	BP	GO:0060393	regulation of pathway-restricted SMAD protein phosphorylation	7/593	62/18723	0.00335817	0.0320869	0.0241553	GDF15/BMP7/INHBB/SNX25/SDCBP/DAB2/TGFB1	7
GO:0070265	BP	GO:0070265	necrotic cell death	7/593	62/18723	0.00335817	0.0320869	0.0241553	CAV1/ASAH1/NUPR1/NINJ1/TMEM123/CYLD/BAX	7
GO:0034620	BP	GO:0034620	cellular response to unfolded protein	9/593	96/18723	0.00339044	0.032264	0.0242886	CCND1/AGR2/HSPA5/CREB3L2/RHBDD2/ATF3/PPP1R15A/HERPUD1/BAX	9
GO:1901655	BP	GO:1901655	cellular response to ketone	9/593	96/18723	0.00339044	0.032264	0.0242886	ERRFI1/KLF2/GAS6/NR3C1/DDIT4/KLF9/ATP2B1/KLF4/MSN	9
GO:0031349	BP	GO:0031349	positive regulation of defense response	18/593	278/18723	0.00342004	0.03248	0.0244512	MDK/NUPR1/LRRK2/GJA1/ITGA2/MAPK13/NINJ1/IL16/SH2D1A/PYHIN1/PYCARD/SPI1/NFKBIA/MEF2C/MNDA/ALOX5AP/CCL5/TYROBP	18
GO:0042176	BP	GO:0042176	regulation of protein catabolic process	23/593	391/18723	0.00344309	0.032633	0.0245664	CLU/CAV1/APOE/TIMP1/NUPR1/LRRK2/GJA1/LRP2/EPHA4/PRICKLE1/GIPC1/RAD23B/HECTD1/TIPARP/VGLL4/PYHIN1/TNFRSF1B/SDCBP/TNFAIP3/DAB2/HERPUD1/CTSA/MSN	23
GO:0001774	BP	GO:0001774	microglial cell activation	6/593	47/18723	0.00350524	0.0329562	0.0248097	CLU/LRRK2/CST7/C1QA/PTPRC/TYROBP	6
GO:0009261	BP	GO:0009261	ribonucleotide catabolic process	6/593	47/18723	0.00350524	0.0329562	0.0248097	PDE5A/PDE8B/NT5E/NT5C2/PDE4B/PNP	6
GO:0097028	BP	GO:0097028	dendritic cell differentiation	6/593	47/18723	0.00350524	0.0329562	0.0248097	DCSTAMP/IRF8/SPI1/HLA-B/GAS6/LGALS9	6
GO:1900744	BP	GO:1900744	regulation of p38MAPK cascade	6/593	47/18723	0.00350524	0.0329562	0.0248097	VEGFA/SASH1/SPI1/DUSP1/GADD45B/CYLD	6
GO:0051099	BP	GO:0051099	positive regulation of binding	13/593	173/18723	0.00351323	0.0329655	0.0248167	CAV1/MET/APOE/LRRK2/CLN5/ITGA2/EPHA4/EPB41L5/PYHIN1/TGFB1/PLAUR/KLF4/STMN1	13
GO:0002335	BP	GO:0002335	mature B cell differentiation	5/593	33/18723	0.00356807	0.0331376	0.0249463	IRF8/SPI1/ITM2A/GPR183/LGALS1	5
GO:0003382	BP	GO:0003382	epithelial cell morphogenesis	5/593	33/18723	0.00356807	0.0331376	0.0249463	MET/ST14/EPB41L5/FLNB/RILPL2	5
GO:0046685	BP	GO:0046685	response to arsenic-containing substance	5/593	33/18723	0.00356807	0.0331376	0.0249463	MAPK13/ATF3/CDKN1A/DDX3X/SLC38A2	5
GO:0048333	BP	GO:0048333	mesodermal cell differentiation	5/593	33/18723	0.00356807	0.0331376	0.0249463	ITGA3/GJA1/ITGA2/HMGA2/KLF4	5
GO:1902992	BP	GO:1902992	negative regulation of amyloid precursor protein catabolic process	5/593	33/18723	0.00356807	0.0331376	0.0249463	CLU/NTRK2/APOE/RTN3/BIN1	5
GO:0030278	BP	GO:0030278	regulation of ossification	10/593	115/18723	0.00357387	0.0331376	0.0249463	MDK/DHRS3/BMP7/ECM1/LRP4/MEF2C/TGFB1/MGP/BCL2/ATP2B1	10
GO:0050777	BP	GO:0050777	negative regulation of immune response	14/593	194/18723	0.00361161	0.0334216	0.0251601	LGALS3/ANXA1/CD55/ARG2/PARP14/SERPINB9/CD96/SPI1/FGL2/HLA-B/TNFAIP3/IL7R/PTPRC/LGALS9	14
GO:1901216	BP	GO:1901216	positive regulation of neuron death	9/593	97/18723	0.00363505	0.0335724	0.0252736	CLU/LCN2/NUPR1/EGR1/C1QA/TYROBP/DDIT4/BAX/FOS	9
GO:2000242	BP	GO:2000242	negative regulation of reproductive process	7/593	63/18723	0.0036771	0.0338942	0.0255158	TIMP1/GJA1/CALR/BMP7/ARHGDIB/PRKACB/DUSP1	7
GO:0070302	BP	GO:0070302	regulation of stress-activated protein kinase signaling cascade	14/593	195/18723	0.00378136	0.0347345	0.0261484	IGFBP6/TPD52L1/VEGFA/PRDX1/SASH1/ZMYND11/TNIK/PYCARD/SPI1/CD27/SDCBP/DUSP1/GADD45B/CYLD	14
GO:0043087	BP	GO:0043087	regulation of GTPase activity	21/593	348/18723	0.00378304	0.0347345	0.0261484	NTRK2/MET/LRRK2/PLXNB2/DOCK9/RGL3/EPHA4/AGRN/MYO9A/SPRY1/SIPA1L2/DOCK8/PYCARD/TBC1D10C/RGS10/CCL3L3/CCL5/CCL4/SEMA4D/IQGAP2/STMN1	21
GO:0015849	BP	GO:0015849	organic acid transport	19/593	303/18723	0.00380042	0.0347844	0.0261859	NMB/SLC26A7/NTRK2/APOE/SLC25A29/ANXA1/SLC17A5/SLC26A4/GJA1/FOLR1/LRP2/SLC7A2/GIPC1/ABCC3/RGS2/FABP5/SLC9A3R1/SLC38A1/SLC38A2	19
GO:1990748	BP	GO:1990748	cellular detoxification	10/593	116/18723	0.00380327	0.0347844	0.0261859	GPX3/APOE/GPX4/TPO/PRDX1/BMP7/GSTM3/ALDH1A1/PIM1/ALOX5AP	10
GO:0046641	BP	GO:0046641	positive regulation of alpha-beta T cell proliferation	4/593	21/18723	0.00388072	0.0352658	0.0265484	CD55/CD3E/PTPRC/LGALS9	4
GO:0097734	BP	GO:0097734	extracellular exosome biogenesis	4/593	21/18723	0.00388072	0.0352658	0.0265484	SDC4/SDC1/RAB27A/SDCBP	4
GO:0150146	BP	GO:0150146	cell junction disassembly	4/593	21/18723	0.00388072	0.0352658	0.0265484	EPHA4/C1QC/C1QB/C1QA	4
GO:0033628	BP	GO:0033628	regulation of cell adhesion mediated by integrin	6/593	48/18723	0.00390092	0.0352658	0.0265484	TESC/MUC1/DPP4/CD3E/CCL5/PLAU	6
GO:0090199	BP	GO:0090199	regulation of release of cytochrome c from mitochondria	6/593	48/18723	0.00390092	0.0352658	0.0265484	CLU/PYCARD/TNFSF10/PLAUR/PMAIP1/BAX	6
GO:1902003	BP	GO:1902003	regulation of amyloid-beta formation	6/593	48/18723	0.00390092	0.0352658	0.0265484	CLU/NTRK2/APOE/RTN3/EPHA4/BIN1	6
GO:0001885	BP	GO:0001885	endothelial cell development	7/593	64/18723	0.00401853	0.036223	0.027269	MET/CLDN1/VEGFA/GSTM3/MARVELD2/MYADM/MSN	7
GO:0051960	BP	GO:0051960	regulation of nervous system development	25/593	443/18723	0.00402555	0.036223	0.027269	TG/FN1/MDK/NTRK2/ID1/VEGFA/BHLHE41/TMEM98/SPINT1/FLRT3/PLXNB2/LRP2/CRABP2/BMP7/EPHA4/AGRN/GOLGA4/MAP2/LRP4/ARNTL/TNFRSF1B/CST7/SEMA4D/TGFB1/BIN1	25
GO:0072676	BP	GO:0072676	lymphocyte migration	10/593	117/18723	0.00404417	0.036223	0.027269	ECM1/DOCK8/PYCARD/CCL3L3/GPR183/CCL5/CCL4/ITGAL/GAS6/MSN	10
GO:0072593	BP	GO:0072593	reactive oxygen species metabolic process	16/593	239/18723	0.00407312	0.036223	0.027269	GPX3/LCN2/CRYAB/LRRK2/TPO/PRDX1/BMP7/ARG2/RAB27A/DUOXA2/TYROBP/TGFB1/DDIT4/BCL2/CDKN1A/PMAIP1	16
GO:0010922	BP	GO:0010922	positive regulation of phosphatase activity	5/593	34/18723	0.00407615	0.036223	0.027269	SLC39A10/ITGA2/MEF2C/PTPRC/PPP1R15A	5
GO:0032743	BP	GO:0032743	positive regulation of interleukin-2 production	5/593	34/18723	0.00407615	0.036223	0.027269	ANXA1/PDE4B/CD3E/PTPRC/PNP	5
GO:0043516	BP	GO:0043516	regulation of DNA damage response, signal transduction by p53 class mediator	5/593	34/18723	0.00407615	0.036223	0.027269	PYHIN1/KMT5A/ATM/CD44/PMAIP1	5
GO:0050869	BP	GO:0050869	negative regulation of B cell activation	5/593	34/18723	0.00407615	0.036223	0.027269	TBC1D10C/MNDA/TNFAIP3/TYROBP/ATM	5
GO:0050931	BP	GO:0050931	pigment cell differentiation	5/593	34/18723	0.00407615	0.036223	0.027269	CITED1/CD63/RAB27A/MEF2C/BCL2	5
GO:0010717	BP	GO:0010717	regulation of epithelial to mesenchymal transition	9/593	99/18723	0.00416566	0.0369487	0.0278152	MDK/BMP7/HPN/VASN/SPRY1/GLIPR2/SDCBP/DAB2/TGFB1	9
GO:0072659	BP	GO:0072659	protein localization to plasma membrane	18/593	284/18723	0.00427398	0.0374758	0.0282121	LGALS3/AGR2/TESC/ITGA3/RAB34/EMP2/GOLGA4/ANK3/HECTD1/TNIK/ABI3/DAB2/GAS6/RAB8B/TGFB1/MYADM/SLC9A3R1/RILPL2	18
GO:0018108	BP	GO:0018108	peptidyl-tyrosine phosphorylation	22/593	375/18723	0.00430426	0.0374758	0.0282121	CD24/CAV1/NTRK2/MET/VEGFA/ERRFI1/AFAP1L2/EPHA4/LRP4/PARP14/ITK/SOCS3/AREG/CD3E/PTPRC/CCL5/GAS6/TNFRSF18/SEMA4D/TGFB1/SH3BP5/CD44	22
GO:0003093	BP	GO:0003093	regulation of glomerular filtration	3/593	11/18723	0.00431267	0.0374758	0.0282121	EMP2/GJA1/GAS6	3
GO:0009128	BP	GO:0009128	purine nucleoside monophosphate catabolic process	3/593	11/18723	0.00431267	0.0374758	0.0282121	NT5E/NT5C2/PNP	3
GO:0033632	BP	GO:0033632	regulation of cell-cell adhesion mediated by integrin	3/593	11/18723	0.00431267	0.0374758	0.0282121	DPP4/CD3E/CCL5	3
GO:0036490	BP	GO:0036490	regulation of translation in response to endoplasmic reticulum stress	3/593	11/18723	0.00431267	0.0374758	0.0282121	DNAJC3/PPP1R15A/DDX3X	3
GO:0042447	BP	GO:0042447	hormone catabolic process	3/593	11/18723	0.00431267	0.0374758	0.0282121	HSD17B6/DIO2/ECE1	3
GO:0045161	BP	GO:0045161	neuronal ion channel clustering	3/593	11/18723	0.00431267	0.0374758	0.0282121	MTCH1/AGRN/NRCAM	3
GO:1903897	BP	GO:1903897	regulation of PERK-mediated unfolded protein response	3/593	11/18723	0.00431267	0.0374758	0.0282121	AGR2/HSPA5/PPP1R15A	3
GO:0010862	BP	GO:0010862	positive regulation of pathway-restricted SMAD protein phosphorylation	6/593	49/18723	0.00432873	0.0374758	0.0282121	GDF15/BMP7/INHBB/SDCBP/DAB2/TGFB1	6
GO:0030857	BP	GO:0030857	negative regulation of epithelial cell differentiation	6/593	49/18723	0.00432873	0.0374758	0.0282121	CAV1/CCND1/ID1/VEGFA/CITED1/SPRY1	6
GO:0052372	BP	GO:0052372	modulation by symbiont of entry into host	6/593	49/18723	0.00432873	0.0374758	0.0282121	CAV1/LGALS9/LGALS1/TRIM22/IFITM3/CXCL8	6
GO:0072091	BP	GO:0072091	regulation of stem cell proliferation	6/593	49/18723	0.00432873	0.0374758	0.0282121	CITED1/ZFP36L1/GJA1/HMGA2/PIM1/PTPRC	6
GO:0048645	BP	GO:0048645	animal organ formation	7/593	65/18723	0.00438344	0.0377409	0.0284117	PAX8/FOLR1/LRP2/BMP7/SPRY1/PIM1/MEF2C	7
GO:0060389	BP	GO:0060389	pathway-restricted SMAD protein phosphorylation	7/593	65/18723	0.00438344	0.0377409	0.0284117	GDF15/BMP7/INHBB/SNX25/SDCBP/DAB2/TGFB1	7
GO:1905330	BP	GO:1905330	regulation of morphogenesis of an epithelium	7/593	65/18723	0.00438344	0.0377409	0.0284117	TACSTD2/MDK/PAX8/LCN2/VEGFA/GJA1/BMP7	7
GO:0001910	BP	GO:0001910	regulation of leukocyte mediated cytotoxicity	8/593	82/18723	0.00440278	0.0377691	0.0284328	SH2D1A/SERPINB9/SPI1/HLA-B/IL7R/PTPRC/TYROBP/LGALS9	8
GO:0008625	BP	GO:0008625	extrinsic apoptotic signaling pathway via death domain receptors	8/593	82/18723	0.00440278	0.0377691	0.0284328	LGALS3/SPI1/TNFAIP3/ATF3/BCL2/DDX3X/PMAIP1/BAX	8
GO:0048638	BP	GO:0048638	regulation of developmental growth	20/593	330/18723	0.0044327	0.0379205	0.0285468	FN1/AGR2/DUSP6/APOE/VEGFA/GDF15/GJA1/CRABP2/AGRN/GOLGA4/MAP2/BASP1/NRCAM/VGLL4/PIM1/MEF2C/RGS2/SEMA4D/BCL2/CDKN1A	20
GO:0031346	BP	GO:0031346	positive regulation of cell projection organization	21/593	353/18723	0.00445244	0.0379205	0.0285468	FN1/MDK/LCN2/NTRK2/APOE/VEGFA/HSPA5/ITGA3/PLXNB2/EPS8/CRABP2/BMP7/ITGA2/EPHA4/AGRN/GOLGA4/TENM1/CREB3L2/RGS2/SEMA4D/RAB8B	21
GO:0019218	BP	GO:0019218	regulation of steroid metabolic process	9/593	100/18723	0.00445269	0.0379205	0.0285468	ASAH1/APOE/APOC1/ATP1A1/EGR1/SREBF1/POR/ERLIN2/RORA	9
GO:0046545	BP	GO:0046545	development of primary female sexual characteristics	9/593	100/18723	0.00445269	0.0379205	0.0285468	VEGFA/NUPR1/HSPA5/INHBB/NRIP1/TIPARP/SLIT3/BCL2/BAX	9
GO:0071214	BP	GO:0071214	cellular response to abiotic stimulus	20/593	331/18723	0.00458271	0.0388302	0.0292317	CRYAB/TIMP1/HSPA5/KCNJ2/ATP1A1/ZFP36L1/GJA1/ERRFI1/EGR1/MAP3K1/ITGA2/HMGA2/SLC25A23/MAPK13/CCND2/CDKN1A/ATM/DDX3X/BAX/SLC38A2	20
GO:0104004	BP	GO:0104004	cellular response to environmental stimulus	20/593	331/18723	0.00458271	0.0388302	0.0292317	CRYAB/TIMP1/HSPA5/KCNJ2/ATP1A1/ZFP36L1/GJA1/ERRFI1/EGR1/MAP3K1/ITGA2/HMGA2/SLC25A23/MAPK13/CCND2/CDKN1A/ATM/DDX3X/BAX/SLC38A2	20
GO:0045061	BP	GO:0045061	thymic T cell selection	4/593	22/18723	0.0046259	0.0388302	0.0292317	CD3G/CD3E/PTPRC/CD3D	4
GO:0045540	BP	GO:0045540	regulation of cholesterol biosynthetic process	4/593	22/18723	0.0046259	0.0388302	0.0292317	APOE/SREBF1/POR/ERLIN2	4
GO:0106118	BP	GO:0106118	regulation of sterol biosynthetic process	4/593	22/18723	0.0046259	0.0388302	0.0292317	APOE/SREBF1/POR/ERLIN2	4
GO:0009119	BP	GO:0009119	ribonucleoside metabolic process	5/593	35/18723	0.00463385	0.0388302	0.0292317	NT5E/ADK/NT5C2/PNP/AMD1	5
GO:0035633	BP	GO:0035633	maintenance of blood-brain barrier	5/593	35/18723	0.00463385	0.0388302	0.0292317	CLDN1/VEGFA/GJA1/LSR/DMD	5
GO:0046640	BP	GO:0046640	regulation of alpha-beta T cell proliferation	5/593	35/18723	0.00463385	0.0388302	0.0292317	CD55/ARG2/CD3E/PTPRC/LGALS9	5
GO:1905898	BP	GO:1905898	positive regulation of response to endoplasmic reticulum stress	5/593	35/18723	0.00463385	0.0388302	0.0292317	CAV1/AGR2/PMAIP1/HERPUD1/BAX	5
GO:0010950	BP	GO:0010950	positive regulation of endopeptidase activity	13/593	179/18723	0.00468808	0.0392147	0.0295211	PERP/CTSH/MTCH1/EPHA4/RPS27L/PYCARD/ASPH/LGALS9/TNFSF10/CYCS/DDX3X/PMAIP1/BAX	13
GO:0018212	BP	GO:0018212	peptidyl-tyrosine modification	22/593	378/18723	0.00472344	0.0394277	0.0296815	CD24/CAV1/NTRK2/MET/VEGFA/ERRFI1/AFAP1L2/EPHA4/LRP4/PARP14/ITK/SOCS3/AREG/CD3E/PTPRC/CCL5/GAS6/TNFRSF18/SEMA4D/TGFB1/SH3BP5/CD44	22
GO:0071902	BP	GO:0071902	positive regulation of protein serine/threonine kinase activity	14/593	200/18723	0.00473032	0.0394277	0.0296815	CD24/CCND1/TPD52L1/VEGFA/LRRK2/FAM20A/EPHA4/HMGA2/TENM1/CCND2/SASH1/TGFB1/CCND3/DDX3X	14
GO:0042446	BP	GO:0042446	hormone biosynthetic process	7/593	66/18723	0.00477284	0.0395064	0.0297407	TG/HSD17B6/TPO/DIO2/ATP1A1/EGR1/POR	7
GO:0050918	BP	GO:0050918	positive chemotaxis	7/593	66/18723	0.00477284	0.0395064	0.0297407	LGALS3/MET/VEGFA/ITGA2/IL16/CCL5/CXCL8	7
GO:0072678	BP	GO:0072678	T cell migration	7/593	66/18723	0.00477284	0.0395064	0.0297407	ECM1/DOCK8/PYCARD/GPR183/CCL5/ITGAL/MSN	7
GO:0019083	BP	GO:0019083	viral transcription	6/593	50/18723	0.00479018	0.0395064	0.0297407	HPN/HMGA2/ZFP36/CCL5/CCL4/IFITM3	6
GO:0050873	BP	GO:0050873	brown fat cell differentiation	6/593	50/18723	0.00479018	0.0395064	0.0297407	DIO2/LAMB3/BMP7/PIM1/RGS2/ARL4A	6
GO:0060688	BP	GO:0060688	regulation of morphogenesis of a branching structure	6/593	50/18723	0.00479018	0.0395064	0.0297407	TACSTD2/MDK/PAX8/VEGFA/LRRK2/BMP7	6
GO:0048675	BP	GO:0048675	axon extension	10/593	120/18723	0.00483985	0.0398461	0.0299965	FN1/APOE/VEGFA/NRP2/GOLGA4/MAP2/NRCAM/SLIT3/RAPH1/SEMA4D	10
GO:0001818	BP	GO:0001818	negative regulation of cytokine production	21/593	357/18723	0.00505629	0.0415553	0.0312831	CD24/FN1/ANXA1/ERRFI1/ARG2/INHBB/CD96/PYCARD/TIGIT/KLF2/ZFP36/TNFAIP3/TMSB4X/PTPRC/TYROBP/GAS6/LGALS9/TGFB1/ATP2B1/KLF4/CYLD	21
GO:2000134	BP	GO:2000134	negative regulation of G1/S transition of mitotic cell cycle	8/593	84/18723	0.00509844	0.0418286	0.0314889	CCND1/SOX4/MUC1/RPS27L/BCL2/CDKN1A/ATM/KLF4	8
GO:0045766	BP	GO:0045766	positive regulation of angiogenesis	13/593	181/18723	0.00514335	0.0420503	0.0316558	S100A1/MDK/CTSH/VEGFA/CHI3L1/ANXA3/RRAS/ECM1/HMGA2/SASH1/NINJ1/KLF4/CXCL8	13
GO:1904018	BP	GO:1904018	positive regulation of vasculature development	13/593	181/18723	0.00514335	0.0420503	0.0316558	S100A1/MDK/CTSH/VEGFA/CHI3L1/ANXA3/RRAS/ECM1/HMGA2/SASH1/NINJ1/KLF4/CXCL8	13
GO:0046635	BP	GO:0046635	positive regulation of alpha-beta T cell activation	7/593	67/18723	0.00518773	0.0423394	0.0318734	ANXA1/CD55/RUNX3/CD3E/PTPRC/LGALS9/PNP	7
GO:0051385	BP	GO:0051385	response to mineralocorticoid	5/593	36/18723	0.0052437	0.0427221	0.0321615	CCND1/CDKN1A/ATP2B1/FOSB/FOS	5
GO:1903038	BP	GO:1903038	negative regulation of leukocyte cell-cell adhesion	11/593	141/18723	0.00528147	0.0429243	0.0323138	SDC4/MDK/LGALS3/ANXA1/CCL28/ARG2/RUNX3/FGL2/TIGIT/LGALS9/KLF4	11
GO:0071622	BP	GO:0071622	regulation of granulocyte chemotaxis	6/593	51/18723	0.00528679	0.0429243	0.0323138	MDK/DAPK2/DPP4/RARRES2/CCL5/CXCL8	6
GO:0003279	BP	GO:0003279	cardiac septum development	9/593	103/18723	0.00540696	0.0438243	0.0329913	PAX8/DHRS3/SOX4/LRP2/NRP2/BMP7/HECTD1/SLIT3/PRDM1	9
GO:0035640	BP	GO:0035640	exploration behavior	4/593	23/18723	0.00546157	0.0440391	0.033153	APOE/LRRK2/ITGA3/DPP4	4
GO:0072677	BP	GO:0072677	eosinophil migration	4/593	23/18723	0.00546157	0.0440391	0.033153	LGALS3/DAPK2/CCL5/CCL4	4
GO:0140112	BP	GO:0140112	extracellular vesicle biogenesis	4/593	23/18723	0.00546157	0.0440391	0.033153	SDC4/SDC1/RAB27A/SDCBP	4
GO:0030433	BP	GO:0030433	ubiquitin-dependent ERAD pathway	8/593	85/18723	0.00547631	0.0440824	0.0331856	CAV1/HSP90B1/HSPA5/CANX/CALR/ERLIN2/RHBDD2/HERPUD1	8
GO:0072006	BP	GO:0072006	nephron development	11/593	142/18723	0.00556646	0.0442971	0.0333472	CD24/TACSTD2/PAX8/VEGFA/CITED1/ITGA3/BMP7/EGR1/BASP1/MEF2C/BCL2	11
GO:0062197	BP	GO:0062197	cellular response to chemical stress	20/593	337/18723	0.00557358	0.0442971	0.0333472	CAV1/LCN2/MET/ANXA1/LRRK2/PRDX1/ZFP36L1/ERRFI1/BMP7/SLC25A23/ARNTL/MAPK13/NR4A2/KLF2/TNFAIP3/BCL2/ATM/DDX3X/KLF4/FOS	20
GO:0031953	BP	GO:0031953	negative regulation of protein autophosphorylation	3/593	12/18723	0.00561605	0.0442971	0.0333472	CAV1/ERRFI1/PTPRC	3
GO:0035739	BP	GO:0035739	CD4-positive, alpha-beta T cell proliferation	3/593	12/18723	0.00561605	0.0442971	0.0333472	CD55/ARG2/LGALS9	3
GO:0043129	BP	GO:0043129	surfactant homeostasis	3/593	12/18723	0.00561605	0.0442971	0.0333472	CTSH/VEGFA/NAPSA	3
GO:0048934	BP	GO:0048934	peripheral nervous system neuron differentiation	3/593	12/18723	0.00561605	0.0442971	0.0333472	NTRK2/ETV1/RUNX3	3
GO:0048935	BP	GO:0048935	peripheral nervous system neuron development	3/593	12/18723	0.00561605	0.0442971	0.0333472	NTRK2/ETV1/RUNX3	3
GO:0070493	BP	GO:0070493	thrombin-activated receptor signaling pathway	3/593	12/18723	0.00561605	0.0442971	0.0333472	MET/IQGAP2/STMN1	3
GO:0071635	BP	GO:0071635	negative regulation of transforming growth factor beta production	3/593	12/18723	0.00561605	0.0442971	0.0333472	CD24/FN1/TYROBP	3
GO:0098911	BP	GO:0098911	regulation of ventricular cardiac muscle cell action potential	3/593	12/18723	0.00561605	0.0442971	0.0333472	CAV1/DSC2/BIN1	3
GO:0140289	BP	GO:0140289	protein mono-ADP-ribosylation	3/593	12/18723	0.00561605	0.0442971	0.0333472	PARP14/PARP4/TIPARP	3
GO:2000561	BP	GO:2000561	regulation of CD4-positive, alpha-beta T cell proliferation	3/593	12/18723	0.00561605	0.0442971	0.0333472	CD55/ARG2/LGALS9	3
GO:0032922	BP	GO:0032922	circadian regulation of gene expression	7/593	68/18723	0.00562911	0.0443257	0.0333687	ID4/ID1/BHLHE41/EGR1/NRIP1/ARNTL/RORA	7
GO:0046634	BP	GO:0046634	regulation of alpha-beta T cell activation	9/593	104/18723	0.00575788	0.0451883	0.0340181	ANXA1/CD55/ARG2/RUNX3/CD3E/PTPRC/LGALS9/PNP/PRDM1	9
GO:1901890	BP	GO:1901890	positive regulation of cell junction assembly	9/593	104/18723	0.00575788	0.0451883	0.0340181	CAV1/SDC4/NTRK2/CLDN1/VEGFA/FLRT3/AGRN/EPB41L5/SEMA4D	9
GO:0010718	BP	GO:0010718	positive regulation of epithelial to mesenchymal transition	6/593	52/18723	0.00582006	0.0455243	0.034271	MDK/BMP7/GLIPR2/SDCBP/DAB2/TGFB1	6
GO:0072523	BP	GO:0072523	purine-containing compound catabolic process	6/593	52/18723	0.00582006	0.0455243	0.034271	PDE5A/PDE8B/NT5E/NT5C2/PDE4B/PNP	6
GO:0045786	BP	GO:0045786	negative regulation of cell cycle	22/593	385/18723	0.00583473	0.0455632	0.0343003	CCND1/CAMK2N1/SOX4/MUC1/NUPR1/ZFP36L1/BMP7/PTTG1/HMGA2/RPS27L/RUNX3/ZFP36L2/TNFAIP3/TGFB1/SLC9A3R1/BCL2/PRKACB/CDKN1A/ATM/DUSP1/KLF4/NR4A1	22
GO:0060761	BP	GO:0060761	negative regulation of response to cytokine stimulus	8/593	86/18723	0.00587517	0.045803	0.0344808	CAV1/ECM1/PARP14/SLIT3/PTPRC/CCL5/GAS6/KLF4	8
GO:0043368	BP	GO:0043368	positive T cell selection	5/593	37/18723	0.0059082	0.0458324	0.034503	CD3G/CD3E/PTPRC/CD3D/BCL2	5
GO:0045616	BP	GO:0045616	regulation of keratinocyte differentiation	5/593	37/18723	0.0059082	0.0458324	0.034503	ZFP36L1/ERRFI1/ZBED2/CD109/ZFP36	5
GO:1905332	BP	GO:1905332	positive regulation of morphogenesis of an epithelium	5/593	37/18723	0.0059082	0.0458324	0.034503	MDK/PAX8/LCN2/VEGFA/GJA1	5
GO:0007568	BP	GO:0007568	aging	20/593	339/18723	0.00594061	0.0460079	0.0346351	CRYAB/CLDN1/TIMP1/LRRK2/GPX4/CANX/CALR/SREBF1/ARG2/HMGA2/ARNTL/ABI3/SPI1/TNFRSF1B/C1QA/BCL2/CDKN1A/ATM/ATP2B1/FOS	20
GO:0045926	BP	GO:0045926	negative regulation of growth	16/593	249/18723	0.006013	0.046492	0.0349995	CRYAB/GDF15/DCBLD2/DCSTAMP/GJA1/MAP2/SLIT3/VGLL4/RGS2/SEMA4D/TGFB1/BCL2/CDKN1A/MT1F/DDX3X/MT1X	16
GO:0097237	BP	GO:0097237	cellular response to toxic substance	10/593	124/18723	0.00608632	0.0469816	0.0353681	GPX3/APOE/GPX4/TPO/PRDX1/BMP7/GSTM3/ALDH1A1/PIM1/ALOX5AP	10
GO:0050810	BP	GO:0050810	regulation of steroid biosynthetic process	7/593	69/18723	0.00609799	0.0469945	0.0353778	ASAH1/APOE/ATP1A1/EGR1/SREBF1/POR/ERLIN2	7
GO:0043433	BP	GO:0043433	negative regulation of DNA-binding transcription factor activity	13/593	185/18723	0.00616011	0.0473955	0.0356797	ID1/NUPR1/BMP7/PIM1/PYCARD/SPI1/NFKBIA/TNFRSF4/TNFAIP3/TMSB4X/GAS6/KLF4/CYLD	13
GO:0050767	BP	GO:0050767	regulation of neurogenesis	21/593	364/18723	0.0062755	0.0482045	0.0362887	FN1/MDK/NTRK2/ID1/VEGFA/BHLHE41/TMEM98/SPINT1/PLXNB2/LRP2/CRABP2/BMP7/EPHA4/GOLGA4/MAP2/LRP4/ARNTL/TNFRSF1B/SEMA4D/TGFB1/BIN1	21
GO:0007566	BP	GO:0007566	embryo implantation	6/593	53/18723	0.00639152	0.0487038	0.0366646	VEGFA/TIMP1/EMP2/GJA1/CALR/ARHGDIB	6
GO:0045744	BP	GO:0045744	negative regulation of G protein-coupled receptor signaling pathway	6/593	53/18723	0.00639152	0.0487038	0.0366646	MET/PDE4B/RGS2/CCL5/CXCL8/STMN1	6
GO:0001779	BP	GO:0001779	natural killer cell differentiation	4/593	24/18723	0.00639231	0.0487038	0.0366646	HECTD1/PTPRC/GAS6/PRDM1	4
GO:0016486	BP	GO:0016486	peptide hormone processing	4/593	24/18723	0.00639231	0.0487038	0.0366646	PCSK1N/PCSK2/ECE1/SCG5	4
GO:1903077	BP	GO:1903077	negative regulation of protein localization to plasma membrane	4/593	24/18723	0.00639231	0.0487038	0.0366646	HECTD1/ABI3/DAB2/TGFB1	4
GO:0034249	BP	GO:0034249	negative regulation of cellular amide metabolic process	17/593	273/18723	0.00641415	0.0487123	0.036671	CLU/NTRK2/APOE/ZFP36L1/CALR/IGF2BP2/RTN3/SAMD4A/NT5C3B/ZFP36L2/ZFP36/RGS2/SYNCRIP/BIN1/EIF4EBP1/PAIP2/DDX3X	17
GO:0046942	BP	GO:0046942	carboxylic acid transport	17/593	273/18723	0.00641415	0.0487123	0.036671	NMB/SLC26A7/NTRK2/SLC25A29/ANXA1/SLC17A5/SLC26A4/GJA1/FOLR1/LRP2/SLC7A2/GIPC1/ABCC3/RGS2/SLC9A3R1/SLC38A1/SLC38A2	17
GO:0031345	BP	GO:0031345	negative regulation of cell projection organization	13/593	186/18723	0.00643777	0.0488129	0.0367467	TACSTD2/APOE/ID1/LRRK2/ITGA3/INPP5J/EPHA4/MAP2/LRP4/SPOCK1/ABI3/SEMA4D/LGALS1	13
GO:0035821	BP	GO:0035821	modulation of process of other organism	9/593	106/18723	0.00651223	0.0492979	0.0371118	SLPI/APOE/HPN/HMGA2/IGF2R/SERPINB9/PRF1/CCL5/CCL4	9
GO:0030279	BP	GO:0030279	negative regulation of ossification	5/593	38/18723	0.0066298	0.0498667	0.03754	MDK/ECM1/LRP4/MEF2C/BCL2	5
GO:0046633	BP	GO:0046633	alpha-beta T cell proliferation	5/593	38/18723	0.0066298	0.0498667	0.03754	CD55/ARG2/CD3E/PTPRC/LGALS9	5
GO:0048246	BP	GO:0048246	macrophage chemotaxis	5/593	38/18723	0.0066298	0.0498667	0.03754	MDK/LGALS3/MTUS1/RARRES2/CCL5	5
GO:0097242	BP	GO:0097242	amyloid-beta clearance	5/593	38/18723	0.0066298	0.0498667	0.03754	CLU/APOE/LRP2/LRP4/MSR1	5
GO:0002573	BP	GO:0002573	myeloid leukocyte differentiation	14/593	208/18723	0.00664126	0.0498731	0.0375448	TESC/VEGFA/ZFP36L1/DCSTAMP/CD109/FBN1/SPI1/JUNB/GPR183/C1QC/TYROBP/LBR/TGFB1/FOS	14
GO:0062023	CC	GO:0062023	collagen-containing extracellular matrix	46/615	425/19550	2.73532e-13	1.30475e-10	9.84714e-11	CLU/FN1/SLPI/S100A6/CTSB/MDK/SERPINA1/LGALS3/HSP90B1/CTSH/SDC2/APOE/TIMP1/GDF15/ANXA1/CCDC80/COL8A1/LAMB3/CD151/BCAM/CALR/BMP7/ECM1/MEGF9/LTBP2/ADAMTS9/AGRN/MFGE8/LTBP4/RARRES2/FBN1/SPARC/SERPINB9/ANXA6/FGL2/C1QC/C1QB/C1QA/LGALS9/TGFBI/TGFB1/LGALS1/MGP/S100A4/CTSS/HNRNPM	46
GO:0030667	CC	GO:0030667	secretory granule membrane	30/615	311/19550	5.79616e-08	1.38238e-05	1.04331e-05	CAV1/APLP2/LGALS3/CD63/CD55/PAM/ATP11A/ATP8A1/MLEC/MFGE8/RAB27A/IGF2R/CD109/AGPAT2/SPARC/TBC1D10C/FCGR2A/TNFRSF1B/GLIPR1/HLA-B/PTPRC/FCER1G/TYROBP/ITGAL/FABP5/PLAU/PLAUR/CD44/CD58/IQGAP2	30
GO:0034774	CC	GO:0034774	secretory granule lumen	30/615	322/19550	1.25097e-07	1.49666e-05	1.12955e-05	CLU/FN1/SLPI/NPC2/SERPINA1/LCN2/CTSH/VEGFA/CHI3L1/TIMP1/PROS1/ECM1/QPCT/RAB27A/DNAJC3/RARRES2/SPARC/PYCARD/SDCBP/MNDA/TMSB4X/S100A11/GAS6/RNASET2/FABP5/TGFB1/PNP/DDX3X/CFD/CTSA	30
GO:0060205	CC	GO:0060205	cytoplasmic vesicle lumen	30/615	325/19550	1.53256e-07	1.49666e-05	1.12955e-05	CLU/FN1/SLPI/NPC2/SERPINA1/LCN2/CTSH/VEGFA/CHI3L1/TIMP1/PROS1/ECM1/QPCT/RAB27A/DNAJC3/RARRES2/SPARC/PYCARD/SDCBP/MNDA/TMSB4X/S100A11/GAS6/RNASET2/FABP5/TGFB1/PNP/DDX3X/CFD/CTSA	30
GO:0031983	CC	GO:0031983	vesicle lumen	30/615	327/19550	1.75194e-07	1.49666e-05	1.12955e-05	CLU/FN1/SLPI/NPC2/SERPINA1/LCN2/CTSH/VEGFA/CHI3L1/TIMP1/PROS1/ECM1/QPCT/RAB27A/DNAJC3/RARRES2/SPARC/PYCARD/SDCBP/MNDA/TMSB4X/S100A11/GAS6/RNASET2/FABP5/TGFB1/PNP/DDX3X/CFD/CTSA	30
GO:0009897	CC	GO:0009897	external side of plasma membrane	35/615	421/19550	1.88259e-07	1.49666e-05	1.12955e-05	CD24/CTSB/ANXA1/ITGA3/BCAM/FOLR1/CALR/LRP2/ECE1/ITGA2/NT5E/MFGE8/SDC1/NRCAM/MSR1/CD8A/CD27/TNFRSF4/FCGR3A/CD48/CD3G/TRBC1/CD3E/IL7R/CD2/IGHG4/TRBC2/PTPRC/CD3D/FCER1G/CD69/TNFRSF18/TMEM123/IGHG1/SLC38A1	35
GO:0030055	CC	GO:0030055	cell-substrate junction	35/615	425/19550	2.36233e-07	1.60976e-05	1.21491e-05	CAV1/SDC4/PDLIM1/HSP90B1/ANXA1/HSPA5/ITGA3/DPP4/FLRT3/CD151/GJA1/CALR/SORBS2/RHOU/RRAS/ITGA2/SYNE2/EPB41L5/DMD/ZFYVE21/IGF2R/FLNB/IL16/TNFSF13B/ANXA6/SH3KBP1/SLA/SDCBP/PTPRC/DAB2/VASP/PLAU/PLAUR/CD44/MSN	35
GO:0005925	CC	GO:0005925	focal adhesion	34/615	418/19550	4.68406e-07	2.79287e-05	2.10783e-05	CAV1/SDC4/PDLIM1/HSP90B1/ANXA1/HSPA5/ITGA3/DPP4/FLRT3/CD151/GJA1/CALR/SORBS2/RHOU/RRAS/ITGA2/SYNE2/EPB41L5/ZFYVE21/IGF2R/FLNB/IL16/TNFSF13B/ANXA6/SH3KBP1/SLA/SDCBP/PTPRC/DAB2/VASP/PLAU/PLAUR/CD44/MSN	34
GO:0031904	CC	GO:0031904	endosome lumen	9/615	35/19550	9.66181e-07	5.12076e-05	3.86472e-05	SFTPB/CTSB/CTSH/PDLIM4/NAPSA/CD63/LRP2/PRF1/CTSS	9
GO:0031091	CC	GO:0031091	platelet alpha granule	13/615	91/19550	5.25537e-06	0.000250681	0.000189193	CLU/FN1/APLP2/SERPINA1/VEGFA/TIMP1/PROS1/CD109/SPARC/TMSB4X/GAS6/TGFB1/CFD	13
GO:0031093	CC	GO:0031093	platelet alpha granule lumen	11/615	67/19550	7.0852e-06	0.00030724	0.000231879	CLU/FN1/SERPINA1/VEGFA/TIMP1/PROS1/SPARC/TMSB4X/GAS6/TGFB1/CFD	11
GO:0005911	CC	GO:0005911	cell-cell junction	34/615	494/19550	1.81114e-05	0.000719929	0.000543343	CLDN7/PERP/PDLIM1/CCND1/CLDN1/VEGFA/PDLIM4/CLDN16/ANXA1/DPP4/FLRT3/KCNJ2/ATP1A1/MXRA8/GJA1/PPL/LSR/HPN/EPHA4/CDH6/ANK3/EPB41L5/MARVELD2/FRMD4B/ITK/SH3KBP1/SDCBP/CD3E/CD2/S100A11/PKN2/VASP/DSC2/MYADM	34
GO:0005788	CC	GO:0005788	endoplasmic reticulum lumen	25/615	313/19550	2.096e-05	0.000743121	0.000560846	CLU/FN1/APLP2/SERPINA1/PRSS23/HSP90B1/SDC2/APOE/TIMP1/HSPA5/COL8A1/PDIA6/RCN2/MXRA8/CANX/CALR/MFGE8/P4HA2/DNAJC3/FBN1/GAS6/MANF/RNASET2/LGALS1/PLAUR	25
GO:0045121	CC	GO:0045121	membrane raft	26/615	335/19550	2.36833e-05	0.000743121	0.000560846	CD24/CAV1/SDC4/LRRK2/CD55/DPP4/ATP1A1/EMP2/GJA1/MALL/PLPP2/LRP4/DMD/ERLIN2/SELPLG/TNFRSF1B/CD8A/TUBA1A/SDCBP/CD48/CD2/PTPRC/MYADM/SLC9A3R1/PGK1/ATP2B1	26
GO:0098857	CC	GO:0098857	membrane microdomain	26/615	335/19550	2.36833e-05	0.000743121	0.000560846	CD24/CAV1/SDC4/LRRK2/CD55/DPP4/ATP1A1/EMP2/GJA1/MALL/PLPP2/LRP4/DMD/ERLIN2/SELPLG/TNFRSF1B/CD8A/TUBA1A/SDCBP/CD48/CD2/PTPRC/MYADM/SLC9A3R1/PGK1/ATP2B1	26
GO:0030139	CC	GO:0030139	endocytic vesicle	26/615	336/19550	2.49265e-05	0.000743121	0.000560846	CAV1/SFTPB/HSP90B1/APOE/CLTA/DPP4/ANXA3/RAB34/MYO6/CALR/LRP2/GIPC1/IGF2R/FLNB/SPARC/MSR1/SH3KBP1/HLA-B/AREG/CD3G/HLA-DQB1/IL7R/CD3D/GNLY/RAB8B/CTSS	26
GO:0030175	CC	GO:0030175	filopodium	13/615	107/19550	3.13682e-05	0.000880155	0.000664268	ITGA3/MYO6/EPHA4/MAP2/SYNE2/DMD/RAPH1/TBC1D10C/ARL4C/VASP/SLC9A3R1/IQGAP2/MSN	13
GO:0005775	CC	GO:0005775	vacuolar lumen	17/615	174/19550	3.66534e-05	0.000971315	0.000733068	NPC2/CTSB/SDC4/ASAH1/DAPK2/SDC2/PLD3/AGRN/SDC1/DNAJC3/PYCARD/SDCBP/MNDA/RNASET2/FABP5/CTSS/CTSA	17
GO:0030136	CC	GO:0030136	clathrin-coated vesicle	18/615	196/19550	4.97773e-05	0.00124967	0.00094315	SFTPB/APOE/CLTA/MYO6/FOLR1/MALL/LRP2/ECE1/RAB27A/IGF2R/AREG/CD3G/HLA-DQB1/IL7R/CD3D/DAB2/AP1S1/RAB8B	18
GO:0030662	CC	GO:0030662	coated vesicle membrane	17/615	181/19550	6.04164e-05	0.00138895	0.00104827	APOE/CLTA/MYO6/FOLR1/LRP2/MCFD2/SREBF1/KDELR3/IGF2R/HLA-B/AREG/CD3G/HLA-DQB1/IL7R/CD3D/DAB2/AP1S1	17
GO:0030018	CC	GO:0030018	Z disc	14/615	130/19550	6.11489e-05	0.00138895	0.00104827	KRT19/S100A1/PDLIM1/CRYAB/PDLIM4/IGFN1/SORBS2/SYNE2/ANK3/DMD/NEBL/FLNB/PDE4B/BIN1	14
GO:0031252	CC	GO:0031252	cell leading edge	29/615	422/19550	7.60579e-05	0.00163942	0.0012373	S100A6/TESC/PDLIM4/DPP4/MYH10/MYO6/SORBS2/EPS8/PSD3/INPP5J/PTPN13/SYNE2/EPB41L5/FRMD4B/DUOXA2/RAPH1/ABI3/DOCK8/S100A11/ABLIM1/PKN2/VASP/MYADM/SLC9A3R1/CD44/ATP2B1/IQGAP2/DDX3X/GABARAPL1	29
GO:0030135	CC	GO:0030135	coated vesicle	23/615	299/19550	7.90496e-05	0.00163942	0.0012373	SFTPB/SERPINA1/APOE/CLTA/MYO6/FOLR1/MALL/LRP2/ECE1/MCFD2/SREBF1/KDELR3/RAB27A/IGF2R/HLA-B/AREG/CD3G/HLA-DQB1/IL7R/CD3D/DAB2/AP1S1/RAB8B	23
GO:0031253	CC	GO:0031253	cell projection membrane	25/615	346/19550	0.000107412	0.0021348	0.00161117	SLC34A2/DHRS3/TESC/ITGA3/DPP4/SLC26A4/MXRA8/MYO6/FOLR1/LRP2/EPS8/PSD3/CYBRD1/SYNE2/EPB41L5/DMD/TXNDC15/DOCK8/TBC1D10C/VASP/SLC9A3R1/CD44/ATP2B1/GABARAPL1/MSN	25
GO:0045334	CC	GO:0045334	clathrin-coated endocytic vesicle	11/615	91/19550	0.000132054	0.00251249	0.00189622	SFTPB/APOE/CLTA/MYO6/LRP2/IGF2R/AREG/CD3G/HLA-DQB1/IL7R/CD3D	11
GO:0031527	CC	GO:0031527	filopodium membrane	5/615	17/19550	0.000136949	0.00251249	0.00189622	ITGA3/SYNE2/DMD/TBC1D10C/VASP	5
GO:0031674	CC	GO:0031674	I band	14/615	141/19550	0.000147399	0.00260406	0.00196533	KRT19/S100A1/PDLIM1/CRYAB/PDLIM4/IGFN1/SORBS2/SYNE2/ANK3/DMD/NEBL/FLNB/PDE4B/BIN1	14
GO:0042470	CC	GO:0042470	melanosome	12/615	109/19550	0.000163956	0.00269679	0.00203531	CTSB/HSP90B1/CD63/HSPA5/PRDX1/ATP1A1/PDIA6/CANX/SYPL1/RAB27A/ANXA6/SDCBP	12
GO:0048770	CC	GO:0048770	pigment granule	12/615	109/19550	0.000163956	0.00269679	0.00203531	CTSB/HSP90B1/CD63/HSPA5/PRDX1/ATP1A1/PDIA6/CANX/SYPL1/RAB27A/ANXA6/SDCBP	12
GO:0005604	CC	GO:0005604	basement membrane	11/615	96/19550	0.000213629	0.0033967	0.00256355	FN1/TIMP1/CCDC80/COL8A1/LAMB3/CD151/MEGF9/AGRN/FBN1/SPARC/TGFBI	11
GO:0043202	CC	GO:0043202	lysosomal lumen	11/615	97/19550	0.00023424	0.00360427	0.0027202	NPC2/CTSB/SDC4/ASAH1/SDC2/PLD3/AGRN/SDC1/RNASET2/CTSS/CTSA	11
GO:0101002	CC	GO:0101002	ficolin-1-rich granule	16/615	185/19550	0.000256859	0.00382881	0.00288967	CTSB/SERPINA1/LGALS3/ASAH1/CTSH/CD55/QPCT/TBC1D10C/FGL2/MNDA/FCER1G/PNP/CD58/DDX3X/CFD/CTSS	16
GO:0016324	CC	GO:0016324	apical plasma membrane	25/615	367/19550	0.000266819	0.00385674	0.00291075	FN1/SLC34A2/CTSB/CLDN1/MUC1/ANXA1/DPP4/ATP1A1/SLC26A4/EMP2/GJA1/FOLR1/LRP2/SORBS2/CYBRD1/HPN/MARVELD2/RAB27A/SLC22A18/TNIK/SLC9A3R1/CD44/ATP2B1/SLC38A1/MSN	25
GO:0030665	CC	GO:0030665	clathrin-coated vesicle membrane	12/615	116/19550	0.000294957	0.00413807	0.00312307	APOE/CLTA/MYO6/LRP2/IGF2R/AREG/CD3G/HLA-DQB1/IL7R/CD3D/DAB2/AP1S1	12
GO:0005903	CC	GO:0005903	brush border	11/615	106/19550	0.000507804	0.00677836	0.00511574	SLC34A2/SLC26A4/FOLR1/LRP2/EPS8/CYBRD1/GIPC1/FLNB/SLC9A3R1/CLIC1/SLC38A2	11
GO:0031258	CC	GO:0031258	lamellipodium membrane	5/615	22/19550	0.000511574	0.00677836	0.00511574	DPP4/SYNE2/DOCK8/VASP/CD44	5
GO:0042581	CC	GO:0042581	specific granule	14/615	160/19550	0.000544743	0.00702276	0.0053002	SLPI/LCN2/CHI3L1/ANXA3/ATP11A/ATP8A1/QPCT/MLEC/RAB27A/AGPAT2/TNFRSF1B/ITGAL/PLAU/PLAUR	14
GO:0071682	CC	GO:0071682	endocytic vesicle lumen	5/615	23/19550	0.000636895	0.00790578	0.00596662	HSP90B1/APOE/CALR/SPARC/GNLY	5
GO:0098858	CC	GO:0098858	actin-based cell projection	17/615	221/19550	0.000653798	0.00790578	0.00596662	LRRK2/ITGA3/MYO6/EPS8/EPHA4/MAP2/SYNE2/DMD/RAPH1/TBC1D10C/ARL4C/VASP/TGFB1/SLC9A3R1/CD44/IQGAP2/MSN	17
GO:0045177	CC	GO:0045177	apical part of cell	27/615	435/19550	0.000662958	0.00790578	0.00596662	FN1/SLC34A2/CTSB/CLDN1/MUC1/ANXA1/DPP4/ATP1A1/SLC26A4/EMP2/MYO6/GJA1/FOLR1/LRP2/SORBS2/CYBRD1/HPN/MARVELD2/RAB27A/DUOXA2/SLC22A18/TNIK/SLC9A3R1/CD44/ATP2B1/SLC38A1/MSN	27
GO:0030027	CC	GO:0030027	lamellipodium	16/615	202/19550	0.000680753	0.00791998	0.00597734	TESC/PDLIM4/DPP4/MYH10/SORBS2/PTPN13/SYNE2/RAPH1/ABI3/DOCK8/ABLIM1/PKN2/VASP/CD44/IQGAP2/DDX3X	16
GO:0072562	CC	GO:0072562	blood microparticle	13/615	146/19550	0.000721219	0.00819099	0.00618188	CLU/FN1/APOE/PROS1/CFH/SDCBP/C1QC/C1QB/IGHG4/TGFB1/IGHG1/CLIC1/MSN	13
GO:0016528	CC	GO:0016528	sarcoplasm	9/615	79/19550	0.000824184	0.00914269	0.00690015	S100A1/HSP90B1/CALR/SYNE2/ANK3/SPOCK1/MEF2C/MANF/ASPH	9
GO:0005771	CC	GO:0005771	multivesicular body	8/615	64/19550	0.000859355	0.00931619	0.00703109	SFTPB/CTSH/NAPSA/CD63/LRRK2/GJA1/RAB27A/CST7	8
GO:0005793	CC	GO:0005793	endoplasmic reticulum-Golgi intermediate compartment	12/615	132/19550	0.000950945	0.01008	0.00760756	FN1/SERPINA1/HSPA5/CD55/PDIA6/DCSTAMP/FOLR1/CALR/MCFD2/MGAT4B/AREG/MGAT1	12
GO:0030666	CC	GO:0030666	endocytic vesicle membrane	15/615	193/19550	0.00119878	0.0124309	0.00938179	CAV1/APOE/ANXA3/RAB34/CALR/LRP2/IGF2R/MSR1/HLA-B/AREG/CD3G/HLA-DQB1/IL7R/CD3D/RAB8B	15
GO:0045178	CC	GO:0045178	basal part of cell	19/615	276/19550	0.00123881	0.0125726	0.00948873	TACSTD2/CLDN7/TSHR/SLC26A7/MET/CLDN1/ANXA1/ITGA3/ATP1A1/FOLR1/ITGA2/ANK3/ST14/MARVELD2/ABCC3/CD44/ATP2B1/SLC38A1/MSN	19
GO:0032994	CC	GO:0032994	protein-lipid complex	6/615	39/19550	0.00127402	0.0126606	0.00955515	CLU/APOE/APOC1/LSR/MSR1/BIN1	6
GO:0043194	CC	GO:0043194	axon initial segment	4/615	16/19550	0.00130514	0.0127051	0.00958878	MAP2/ANK3/NRCAM/BIN1	4
GO:0009925	CC	GO:0009925	basal plasma membrane	18/615	257/19550	0.00135795	0.0129548	0.00977722	TACSTD2/CLDN7/TSHR/SLC26A7/MET/CLDN1/ANXA1/ITGA3/ATP1A1/FOLR1/ANK3/ST14/MARVELD2/ABCC3/CD44/ATP2B1/SLC38A1/MSN	18
GO:0030133	CC	GO:0030133	transport vesicle	25/615	412/19550	0.00141624	0.013246	0.00999699	LRRK2/CLTA/CD55/SLC17A5/PAM/PCSK2/FOLR1/MCFD2/SREBF1/SYPL1/GIPC1/KDELR3/RAB27A/IGF2R/MCTP2/PDE4B/HLA-B/AREG/HLA-DQB1/AP1S1/RAB8B/SYTL3/BIN1/ATP2B1/SYNGR2	25
GO:1904813	CC	GO:1904813	ficolin-1-rich granule lumen	11/615	124/19550	0.00186207	0.0167998	0.0126791	CTSB/SERPINA1/ASAH1/CTSH/QPCT/FGL2/MNDA/PNP/DDX3X/CFD/CTSS	11
GO:0030669	CC	GO:0030669	clathrin-coated endocytic vesicle membrane	8/615	72/19550	0.00186664	0.0167998	0.0126791	APOE/LRP2/IGF2R/AREG/CD3G/HLA-DQB1/IL7R/CD3D	8
GO:0043197	CC	GO:0043197	dendritic spine	14/615	183/19550	0.00199808	0.0176497	0.0133205	CRYAB/NTRK2/PDLIM4/KCNJ2/CANX/EPHA4/GIPC1/ABI3/PDE4B/SLA/RGS10/CD3E/ATP2B1/DNAJB1	14
GO:0043034	CC	GO:0043034	costamere	4/615	18/19550	0.0020874	0.017904	0.0135124	KRT19/SDC4/ANK3/DMD	4
GO:0044309	CC	GO:0044309	neuron spine	14/615	184/19550	0.00210194	0.017904	0.0135124	CRYAB/NTRK2/PDLIM4/KCNJ2/CANX/EPHA4/GIPC1/ABI3/PDE4B/SLA/RGS10/CD3E/ATP2B1/DNAJB1	14
GO:0070160	CC	GO:0070160	tight junction	11/615	129/19550	0.00254615	0.0213073	0.016081	CLDN7/CCND1/CLDN1/CLDN16/MXRA8/GJA1/LSR/ANK3/MARVELD2/FRMD4B/VASP	11
GO:0016323	CC	GO:0016323	basolateral plasma membrane	16/615	231/19550	0.00273989	0.0221513	0.016718	CLDN7/TSHR/SLC26A7/CLDN1/ANXA1/ITGA3/ATP1A1/FOLR1/ANK3/ST14/MARVELD2/ABCC3/CD44/ATP2B1/SLC38A1/MSN	16
GO:0030016	CC	GO:0030016	myofibril	16/615	231/19550	0.00273989	0.0221513	0.016718	KRT19/S100A1/SDC4/PDLIM1/CRYAB/PDLIM4/IGFN1/SORBS2/SYNE2/ANK3/DMD/NEBL/FLNB/PDE4B/BIN1/SYNE1	16
GO:0033116	CC	GO:0033116	endoplasmic reticulum-Golgi intermediate compartment membrane	8/615	77/19550	0.00286285	0.0224168	0.0169184	SERPINA1/CD55/DCSTAMP/FOLR1/CALR/MCFD2/AREG/MGAT1	8
GO:0030017	CC	GO:0030017	sarcomere	15/615	211/19550	0.00286672	0.0224168	0.0169184	KRT19/S100A1/PDLIM1/CRYAB/PDLIM4/IGFN1/SORBS2/SYNE2/ANK3/DMD/NEBL/FLNB/PDE4B/BIN1/SYNE1	15
GO:0030658	CC	GO:0030658	transport vesicle membrane	15/615	212/19550	0.00299824	0.0230671	0.0174091	LRRK2/CLTA/SLC17A5/PAM/FOLR1/MCFD2/SREBF1/SYPL1/MCTP2/HLA-B/AREG/HLA-DQB1/AP1S1/ATP2B1/SYNGR2	15
GO:0034663	CC	GO:0034663	endoplasmic reticulum chaperone complex	3/615	10/19550	0.00315079	0.023856	0.0180045	HSP90B1/HSPA5/PDIA6	3
GO:0005790	CC	GO:0005790	smooth endoplasmic reticulum	5/615	33/19550	0.00346747	0.0258435	0.0195045	HSPA5/KCNJ2/CANX/CALR/DNAJC3	5
GO:0032432	CC	GO:0032432	actin filament bundle	8/615	80/19550	0.00363423	0.0266696	0.020128	PDLIM1/CRYAB/PDLIM4/MYH10/LIMCH1/NEBL/FLNB/ABLIM1	8
GO:0043292	CC	GO:0043292	contractile fiber	16/615	239/19550	0.00382654	0.0276555	0.0208721	KRT19/S100A1/SDC4/PDLIM1/CRYAB/PDLIM4/IGFN1/SORBS2/SYNE2/ANK3/DMD/NEBL/FLNB/PDE4B/BIN1/SYNE1	16
GO:0034358	CC	GO:0034358	plasma lipoprotein particle	5/615	36/19550	0.0050984	0.034742	0.0262204	CLU/APOE/APOC1/LSR/MSR1	5
GO:0043198	CC	GO:0043198	dendritic shaft	5/615	36/19550	0.0050984	0.034742	0.0262204	INPP5J/EPHA4/MAP2/GIPC1/ABI3	5
GO:0098576	CC	GO:0098576	lumenal side of membrane	5/615	36/19550	0.0050984	0.034742	0.0262204	CANX/CALR/HLA-B/HLA-DQB1/CTSA	5
GO:1990777	CC	GO:1990777	lipoprotein particle	5/615	36/19550	0.0050984	0.034742	0.0262204	CLU/APOE/APOC1/LSR/MSR1	5
GO:0005796	CC	GO:0005796	Golgi lumen	9/615	104/19550	0.00551989	0.0370844	0.0279882	SDC4/MUC1/SDC2/PROS1/MUC21/AGRN/SDC1/GAS6/TGFB1	9
GO:0070820	CC	GO:0070820	tertiary granule	12/615	164/19550	0.00578861	0.0383495	0.028943	LGALS3/ASAH1/CTSH/CD55/ATP11A/METTL7A/QPCT/TBC1D10C/FCER1G/PLAU/CD58/CTSS	12
GO:0016529	CC	GO:0016529	sarcoplasmic reticulum	7/615	70/19550	0.00636666	0.0416014	0.0313973	S100A1/HSP90B1/CALR/SYNE2/ANK3/MANF/ASPH	7
GO:0001725	CC	GO:0001725	stress fiber	7/615	71/19550	0.00687651	0.0433583	0.0327233	PDLIM1/PDLIM4/MYH10/LIMCH1/NEBL/FLNB/ABLIM1	7
GO:0097517	CC	GO:0097517	contractile actin filament bundle	7/615	71/19550	0.00687651	0.0433583	0.0327233	PDLIM1/PDLIM4/MYH10/LIMCH1/NEBL/FLNB/ABLIM1	7
GO:0034362	CC	GO:0034362	low-density lipoprotein particle	3/615	13/19550	0.00699914	0.0433583	0.0327233	APOE/LSR/MSR1	3
GO:0042627	CC	GO:0042627	chylomicron	3/615	13/19550	0.00699914	0.0433583	0.0327233	APOE/APOC1/LSR	3
GO:0005765	CC	GO:0005765	lysosomal membrane	22/615	395/19550	0.00724784	0.0437623	0.0330281	TSPAN1/CD63/CLTA/SLC17A5/DPP4/MYO6/ATP11A/LRP2/ATP8A1/CLN5/ECE1/CYBRD1/PLD3/BORCS7/VASN/ANXA6/GLIPR1/HLA-DQB1/DAB2/AP1S1/IFITM3/CTSA	22
GO:0098852	CC	GO:0098852	lytic vacuole membrane	22/615	395/19550	0.00724784	0.0437623	0.0330281	TSPAN1/CD63/CLTA/SLC17A5/DPP4/MYO6/ATP11A/LRP2/ATP8A1/CLN5/ECE1/CYBRD1/PLD3/BORCS7/VASN/ANXA6/GLIPR1/HLA-DQB1/DAB2/AP1S1/IFITM3/CTSA	22
GO:0035578	CC	GO:0035578	azurophil granule lumen	8/615	91/19550	0.00790291	0.0465393	0.035124	NPC2/DNAJC3/PYCARD/SDCBP/MNDA/RNASET2/FABP5/CTSA	8
GO:0035579	CC	GO:0035579	specific granule membrane	8/615	91/19550	0.00790291	0.0465393	0.035124	ATP11A/ATP8A1/MLEC/AGPAT2/TNFRSF1B/ITGAL/PLAU/PLAUR	8
GO:0005770	CC	GO:0005770	late endosome	17/615	282/19550	0.008219	0.0478105	0.0360834	SFTPB/CTSH/NAPSA/CD63/LRRK2/GJA1/PLD3/DYNC1LI2/PARM1/RAB27A/IGF2R/ATP13A3/ANXA6/CST7/RASGEF1B/CTSS/IFITM3	17
GO:0043394	MF	GO:0043394	proteoglycan binding	10/606	36/18368	1.66165e-07	0.000128113	0.000109319	FN1/CTSB/APOE/CFH/PTPRF/ITGA2/AGRN/SDCBP/PTPRC/CTSS	10
GO:0050840	MF	GO:0050840	extracellular matrix binding	11/606	56/18368	1.77808e-06	0.000465019	0.000396801	LGALS3/VEGFA/ITGA3/BCAM/ECM1/ITGA2/AGRN/SPARC/TGFBI/LGALS1/CTSS	11
GO:0043236	MF	GO:0043236	laminin binding	8/606	28/18368	2.32239e-06	0.000465019	0.000396801	LGALS3/ITGA3/BCAM/ECM1/ITGA2/AGRN/LGALS1/CTSS	8
GO:0061134	MF	GO:0061134	peptidase regulator activity	23/606	230/18368	2.41255e-06	0.000465019	0.000396801	FN1/SLPI/CST6/CAV1/APLP2/PEBP1/SERPINA1/CTSH/TIMP1/PROS1/PCSK1N/SPINT1/PTTG1/RPS27L/CD109/SPOCK1/SERPINB9/PYCARD/CD27/CST7/GAS6/TNFAIP8/BIN1	23
GO:0005539	MF	GO:0005539	glycosaminoglycan binding	22/606	230/18368	8.17453e-06	0.00107823	0.00092005	FN1/APLP2/MDK/APOE/VEGFA/CCDC80/NELL2/LIPH/CFH/PTPRF/NRP2/BMP7/LTBP2/AGRN/LIPG/LTBP4/TENM1/SLIT3/FBN1/ANXA6/PTPRC/CD44	22
GO:0008330	MF	GO:0008330	protein tyrosine/threonine phosphatase activity	5/606	10/18368	8.44406e-06	0.00107823	0.00092005	DUSP6/DUSP5/DUSP2/DUSP4/DUSP1	5
GO:0008201	MF	GO:0008201	heparin binding	18/606	166/18368	9.78933e-06	0.00107823	0.00092005	FN1/APLP2/MDK/APOE/VEGFA/CCDC80/NELL2/LIPH/CFH/PTPRF/NRP2/BMP7/LTBP2/LIPG/TENM1/SLIT3/FBN1/PTPRC	18
GO:1901681	MF	GO:1901681	sulfur compound binding	23/606	265/18368	2.49414e-05	0.00240373	0.00205111	FN1/APLP2/MDK/APOE/VEGFA/CCDC80/NELL2/LIPH/CFH/PTPRF/NRP2/BMP7/GSTM3/LTBP2/ITGA2/AGRN/LIPG/TPMT/TENM1/SLIT3/FBN1/ANXA6/PTPRC	23
GO:0004866	MF	GO:0004866	endopeptidase inhibitor activity	18/606	180/18368	2.96123e-05	0.00253679	0.00216464	SLPI/CST6/APLP2/PEBP1/SERPINA1/TIMP1/PROS1/PCSK1N/SPINT1/PTTG1/CD109/SPOCK1/SERPINB9/CD27/CST7/GAS6/TNFAIP8/BIN1	18
GO:0017017	MF	GO:0017017	MAP kinase tyrosine/serine/threonine phosphatase activity	5/606	13/18368	3.97072e-05	0.00306142	0.00261231	DUSP6/DUSP5/DUSP2/DUSP4/DUSP1	5
GO:0030414	MF	GO:0030414	peptidase inhibitor activity	18/606	187/18368	4.91757e-05	0.00344677	0.00294113	SLPI/CST6/APLP2/PEBP1/SERPINA1/TIMP1/PROS1/PCSK1N/SPINT1/PTTG1/CD109/SPOCK1/SERPINB9/CD27/CST7/GAS6/TNFAIP8/BIN1	18
GO:0008236	MF	GO:0008236	serine-type peptidase activity	18/606	191/18368	6.489e-05	0.00416918	0.00355757	PRSS23/CTSH/DPP4/PCSK2/CFI/KLK11/HPN/KLK10/ST14/SCPEP1/RHBDD2/GZMM/GZMK/SEC11C/PLAU/CFD/CTSS/CTSA	18
GO:0061135	MF	GO:0061135	endopeptidase regulator activity	18/606	194/18368	7.94389e-05	0.00467507	0.00398924	SLPI/CST6/APLP2/PEBP1/SERPINA1/TIMP1/PROS1/PCSK1N/SPINT1/PTTG1/CD109/SPOCK1/SERPINB9/CD27/CST7/GAS6/TNFAIP8/BIN1	18
GO:0017171	MF	GO:0017171	serine hydrolase activity	18/606	195/18368	8.48911e-05	0.00467507	0.00398924	PRSS23/CTSH/DPP4/PCSK2/CFI/KLK11/HPN/KLK10/ST14/SCPEP1/RHBDD2/GZMM/GZMK/SEC11C/PLAU/CFD/CTSS/CTSA	18
GO:0002020	MF	GO:0002020	protease binding	14/606	135/18368	0.000151355	0.00777965	0.00663838	FN1/SERPINA1/LCN2/NTRK2/TIMP1/ITGA3/DPP4/ECM1/RHBDD2/SERPINB9/PYCARD/TNFAIP3/BIN1/BCL2	14
GO:0043395	MF	GO:0043395	heparan sulfate proteoglycan binding	5/606	17/18368	0.000171065	0.0082432	0.00703392	APOE/CFH/ITGA2/AGRN/PTPRC	5
GO:0051087	MF	GO:0051087	chaperone binding	12/606	107/18368	0.000212519	0.00926415	0.0079051	CLU/FN1/HSPA5/ATP1A1/CALR/LRP2/DNAJC3/HLA-B/DNAJB4/BIN1/BAX/DNAJB1	12
GO:0004252	MF	GO:0004252	serine-type endopeptidase activity	16/606	174/18368	0.000216284	0.00926415	0.0079051	PRSS23/CTSH/DPP4/PCSK2/CFI/KLK11/HPN/KLK10/ST14/RHBDD2/GZMM/GZMK/SEC11C/PLAU/CFD/CTSS	16
GO:0033549	MF	GO:0033549	MAP kinase phosphatase activity	5/606	18/18368	0.00023046	0.00935181	0.00797991	DUSP6/DUSP5/DUSP2/DUSP4/DUSP1	5
GO:0001968	MF	GO:0001968	fibronectin binding	6/606	28/18368	0.000254871	0.00982527	0.00838391	SDC4/IGFBP6/VEGFA/CCDC80/ITGA3/CTSS	6
GO:0043028	MF	GO:0043028	cysteine-type endopeptidase regulator activity involved in apoptotic process	7/606	40/18368	0.000296984	0.0109036	0.00930401	CTSH/RPS27L/SERPINB9/PYCARD/CD27/GAS6/TNFAIP8	7
GO:0002162	MF	GO:0002162	dystroglycan binding	4/606	11/18368	0.000321712	0.0112745	0.00962058	AGR2/AGRN/MAP2/DMD	4
GO:0003779	MF	GO:0003779	actin binding	29/606	441/18368	0.000355139	0.0119049	0.0101584	PDLIM1/PDLIM4/LRRK2/DSTN/MYH10/MYO6/EPS8/LIMCH1/SYNE2/GIPC1/DMD/MSRB2/NEBL/FLNB/MYO9A/ABI3/TMSB10/ANXA6/FXYD5/LSP1/TMSB4X/ABLIM1/PXK/VASP/BIN1/IQGAP2/S100A4/SYNE1/MSN	29
GO:0004869	MF	GO:0004869	cysteine-type endopeptidase inhibitor activity	8/606	56/18368	0.000470941	0.015129	0.0129096	CST6/PTTG1/SPOCK1/SERPINB9/CD27/CST7/GAS6/TNFAIP8	8
GO:0048306	MF	GO:0048306	calcium-dependent protein binding	10/606	88/18368	0.000633542	0.0195384	0.0166722	S100A13/S100A1/S100A6/S100A2/ANXA1/ANXA3/S100A16/ANXA6/S100A11/S100A4	10
GO:0019207	MF	GO:0019207	kinase regulator activity	18/606	233/18368	0.000754687	0.0223794	0.0190963	CD24/CCND1/CAMK2N1/TESC/FAM20A/AFAP1L2/CCND2/DNAJC3/SOCS3/RHOH/CCL5/GAS6/CDKN1A/CCND3/SH3BP5/DDX3X/CCNL1/KLF4	18
GO:0005125	MF	GO:0005125	cytokine activity	18/606	235/18368	0.000833289	0.023795	0.0203043	CXCL14/VEGFA/TIMP1/GDF15/CCL28/BMP7/INHBB/IL16/TNFSF13B/AREG/CCL3L3/CCL5/IL32/CCL4/TGFB1/CMTM3/TNFSF10/CXCL8	18
GO:0035259	MF	GO:0035259	glucocorticoid receptor binding	4/606	14/18368	0.000901721	0.0248295	0.0211871	NRIP1/NR4A2/TACC1/NR4A1	4
GO:0004029	MF	GO:0004029	aldehyde dehydrogenase (NAD+) activity	4/606	15/18368	0.00119773	0.0318431	0.0271717	ALDH9A1/ALDH1A1/ALDH7A1/ALDH2	4
GO:0019887	MF	GO:0019887	protein kinase regulator activity	16/606	204/18368	0.0012401	0.0318706	0.0271952	CD24/CCND1/CAMK2N1/TESC/FAM20A/AFAP1L2/CCND2/DNAJC3/SOCS3/CCL5/GAS6/CDKN1A/CCND3/SH3BP5/DDX3X/CCNL1	16
GO:0004879	MF	GO:0004879	nuclear receptor activity	7/606	52/18368	0.00151509	0.0363446	0.0310128	SREBF1/NR2F6/RXRG/NR4A2/NR3C1/RORA/NR4A1	7
GO:0098531	MF	GO:0098531	ligand-activated transcription factor activity	7/606	52/18368	0.00151509	0.0363446	0.0310128	SREBF1/NR2F6/RXRG/NR4A2/NR3C1/RORA/NR4A1	7
GO:0004030	MF	GO:0004030	aldehyde dehydrogenase [NAD(P)+] activity	4/606	16/18368	0.0015556	0.0363446	0.0310128	ALDH9A1/ALDH1A1/ALDH7A1/ALDH2	4
GO:0048018	MF	GO:0048018	receptor ligand activity	29/606	487/18368	0.00167738	0.0380371	0.0324571	TG/CXCL14/MDK/LGALS3/NMB/VEGFA/TIMP1/GDF15/DPP4/FLRT3/CCL28/BMP7/INHBB/CD320/FBN1/IL16/TNFSF13B/AREG/CCL3L3/CCL5/IL32/CCL4/GAS6/MANF/SEMA4D/TGFB1/CMTM3/TNFSF10/CXCL8	29
GO:0005201	MF	GO:0005201	extracellular matrix structural constituent	14/606	172/18368	0.00172844	0.038075	0.0324894	FN1/CHI3L1/COL8A1/LAMB3/ECM1/LTBP2/AGRN/MFGE8/LTBP4/FBN1/SPARC/FGL2/TGFBI/MGP	14
GO:0005518	MF	GO:0005518	collagen binding	8/606	69/18368	0.00190711	0.040844	0.0348522	FN1/CTSB/ITGA3/ITGA2/SPARC/TGFBI/CD44/CTSS	8
GO:0030674	MF	GO:0030674	protein-macromolecule adaptor activity	20/606	296/18368	0.00204057	0.042521	0.0362832	CAV1/LRRK2/FLRT3/SORBS2/EPS8/AFAP1L2/SYNE2/ANK3/TRAT1/SDCBP/CD3G/CD3E/DAB2/AP1S1/GAS6/SLC9A3R1/TRIM22/KLF4/HERPUD1/SYNE1	20
GO:0030546	MF	GO:0030546	signaling receptor activator activity	29/606	495/18368	0.00213388	0.0432954	0.036944	TG/CXCL14/MDK/LGALS3/NMB/VEGFA/TIMP1/GDF15/DPP4/FLRT3/CCL28/BMP7/INHBB/CD320/FBN1/IL16/TNFSF13B/AREG/CCL3L3/CCL5/IL32/CCL4/GAS6/MANF/SEMA4D/TGFB1/CMTM3/TNFSF10/CXCL8	29
GO:0019838	MF	GO:0019838	growth factor binding	12/606	141/18368	0.00248799	0.0491857	0.0419702	S100A13/NTRK2/IGFBP6/LRP2/NRP2/LTBP2/LTBP4/VASN/IGF2R/CD109/SDCBP/DUSP1	12
